# Supplementary material for: Development and validation of ferroptosis-related lncRNAs signature for hepatocellular carcinoma
Source: PeerJ journal article supplement (doi:10.7717/peerj.11627), 2021-06-11

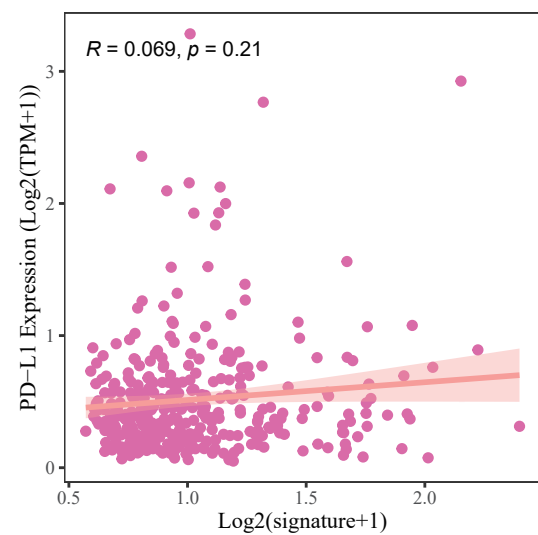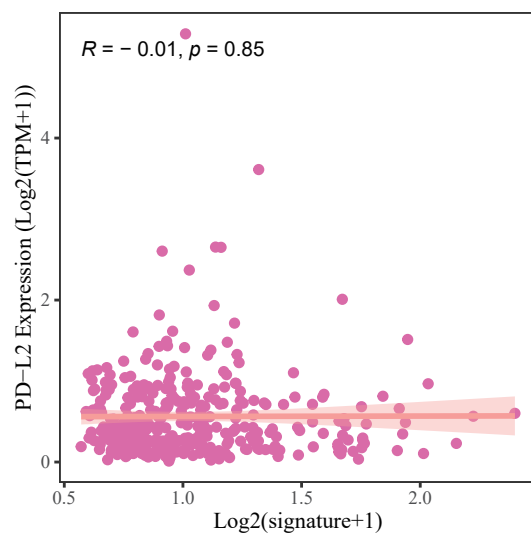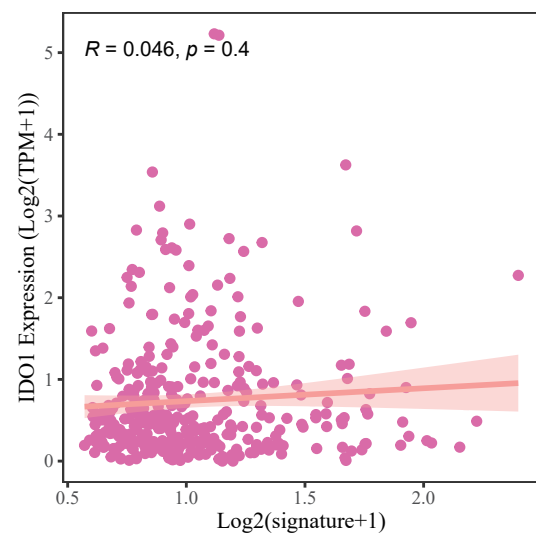

Supplement: Figure_S1.pdf [file Figure_S1.pdf]
