# Supplementary material for: Development and validation of ferroptosis-related lncRNAs signature for hepatocellular carcinoma
Source: PeerJ. 2021 Jun 11;9:e11627. doi: 10.7717/peerj.11627 (PMC8202323; doi:10.7717/peerj.11627)
Supplement: Supplemental Information 2 [file peerj-09-11627-s002.xlsx]

## Sheet: Sheet1
ID	Type	OS	OS.time	Age	Gender	Grade	Stage	T	M	N	Etiology	Radiation_therapy	Family_history_of_cancer
TCGA-2Y-A9GU	LIHC	Alive	1939	<65	FEMALE	G2	Stage I	T1	MX	NX	None	NO	Yes
TCGA-2Y-A9GV	LIHC	Dead	2532	<65	FEMALE	G1	Stage I	T1	MX	NX	Alcohol consumption	NO	No
TCGA-2Y-A9GY	LIHC	Dead	757	<65	FEMALE	G3	Stage II	T2	MX	NX	None	NO	Yes
TCGA-2Y-A9GZ	LIHC	Dead	848	>=65	FEMALE	G2	Stage II	T2	MX	NX	None	NO	Yes
TCGA-2Y-A9H2	LIHC	Alive	1731	<65	FEMALE	G3	Stage I	T1	MX	N0	Alcohol consumption	NO	No
TCGA-2Y-A9H5	LIHC	Dead	555	<65	FEMALE	G3	Stage I	T1	MX	N0	Alcohol consumption|Hepatitis C	NO	Yes
TCGA-2Y-A9H6	LIHC	Alive	357	>=65	FEMALE	G2	Stage I	T1	MX	NX	Alcohol consumption	[Unknown]	Yes
TCGA-2Y-A9H7	LIHC	Alive	1168	>=65	FEMALE	G2	Stage I	T1	MX	N0	None	NO	No
TCGA-2Y-A9H8	LIHC	Dead	633	>=65	FEMALE	G2	Stage II	T1	MX	NX	Alcohol consumption	NO	Yes
TCGA-5R-AA1D	LIHC	Alive	449	<65	FEMALE	G3	Stage IIIA	T3a	M0	N0	None	YES	No
TCGA-5R-AAAM	LIHC	Dead	46	>=65	FEMALE	G2	Stage II	T2	M0	N0	None	NO	No
TCGA-BC-4072	LIHC	Dead	1490	>=65	FEMALE	G3	Stage IIIA	T3	M0	N0	None	NO	Yes
TCGA-BC-A10Q	LIHC	Dead	1135	>=65	FEMALE	[Not Available]	[Not Available]	T2	MX	NX	None	NO	Yes
TCGA-BC-A10R	LIHC	Dead	308	>=65	FEMALE	G2	[Not Available]	T3	MX	NX	None	NO	Yes
TCGA-BC-A10X	LIHC	Dead	770	<65	FEMALE	G2	Stage IIIA	T3a	MX	N0	None	NO	Yes
TCGA-BC-A10Z	LIHC	Dead	34	<65	FEMALE	G2	Stage I	T1	MX	N0	None	NO	Yes
TCGA-BC-A110	LIHC	Dead	2116	<65	FEMALE	G1	[Not Available]	T1	MX	NX	Alcohol consumption	NO	Yes
TCGA-BC-A216	LIHC	Alive	1351	<65	FEMALE	G2	Stage IIIA	T3	M0	NX	None	NO	Yes
TCGA-BC-A217	LIHC	Dead	1397	>=65	FEMALE	G3	Stage II	T2	M0	NX	Alcohol consumption	NO	No
TCGA-BC-A3KF	LIHC	Alive	8	>=65	FEMALE	G2	Stage I	T1	M0	NX	None	[Unknown]	Yes
TCGA-BC-A3KG	LIHC	Alive	680	>=65	FEMALE	G3	Stage II	T2	M0	N0	Alcohol consumption	NO	No
TCGA-BC-A8YO	LIHC	Alive	562	>=65	FEMALE	G3	Stage IIIC	T4	M0	N0	Alcohol consumption|Other	NO	Yes
TCGA-BD-A3EP	LIHC	Alive	409	>=65	FEMALE	G2	Stage I	T1	M0	N0	None	NO	No
TCGA-BW-A5NP	LIHC	Alive	0	<65	FEMALE	G3	Stage IV	T2	M1	N0	Hepatitis B	NO	[Unknown]
TCGA-CC-5259	LIHC	Alive	250	<65	FEMALE	G2	Stage IIIC	T4	M0	N0	None	NO	No
TCGA-CC-5260	LIHC	Dead	87	<65	FEMALE	G1	Stage IIIC	T4	M0	N0	[Not Available]	NO	No
TCGA-CC-A123	LIHC	Alive	219	<65	FEMALE	G1	Stage IIIA	T3	M0	N0	[Not Available]	NO	[Not Available]
TCGA-CC-A8HU	LIHC	Dead	344	<65	FEMALE	G3	Stage IIIA	T3	M0	N0	None	NO	No
TCGA-CC-A8HV	LIHC	Dead	279	<65	FEMALE	G2	Stage II	T2	M0	N0	None	NO	No
TCGA-CC-A9FU	LIHC	Alive	0	<65	FEMALE	G2	Stage IIIA	T3a	M0	N0	Hepatitis B	[Unknown]	No
TCGA-DD-A113	LIHC	Alive	2425	<65	FEMALE	G3	Stage II	T2	M0	N0	Other	NO	[Not Available]
TCGA-DD-A118	LIHC	Alive	3437	>=65	FEMALE	G2	Stage II	T2	M0	N0	[Not Available]	NO	No
TCGA-DD-A11D	LIHC	Dead	1560	<65	FEMALE	G2	Stage I	T1	M0	N0	Nonalcoholic Fatty Liver Disease	NO	Yes
TCGA-DD-A1EB	LIHC	Alive	2017	>=65	FEMALE	G2	Stage I	T1	M0	N0	Other	NO	Yes
TCGA-DD-A1EC	LIHC	Alive	602	<65	FEMALE	G3	Stage I	T1	M0	N0	[Not Available]	NO	No
TCGA-DD-A1EF	LIHC	Dead	394	<65	FEMALE	G3	Stage I	T1	M0	N0	None	[Unknown]	Yes
TCGA-DD-A1EJ	LIHC	Dead	1005	>=65	FEMALE	G2	Stage IIIC	T1	M0	N1	None	NO	Yes
TCGA-DD-A1EK	LIHC	Dead	558	<65	FEMALE	G2	Stage IVB	T4	M1	N0	Other	NO	Yes
TCGA-DD-A39W	LIHC	Dead	827	<65	FEMALE	G2	Stage III	T3	M0	N0	None	[Unknown]	[Not Available]
TCGA-DD-A39X	LIHC	Dead	1694	>=65	FEMALE	G2	Stage I	T1	M0	NX	None	NO	Yes
TCGA-DD-A39Z	LIHC	Dead	601	<65	FEMALE	G2	Stage II	T2	M0	NX	Alcohol consumption	[Unknown]	Yes
TCGA-DD-A3A2	LIHC	Dead	2131	>=65	FEMALE	G1	Stage I	T1	M0	N0	None	NO	No
TCGA-DD-A3A5	LIHC	Dead	3125	>=65	FEMALE	G2	Stage III	T3	M0	N0	None	NO	No
TCGA-DD-A3A6	LIHC	Dead	3258	>=65	FEMALE	G2	Stage II	T2	M0	N0	None	NO	No
TCGA-DD-A3A9	LIHC	Dead	931	<65	FEMALE	G2	Stage IVB	T4	M1	N0	Other	[Unknown]	No
TCGA-DD-A4NA	LIHC	Alive	1008	>=65	FEMALE	G3	Stage IIIC	T2	M0	N1	None	NO	Yes
TCGA-DD-A4ND	LIHC	Alive	2746	<65	FEMALE	G3	Stage I	T1	M0	N0	None	NO	Yes
TCGA-DD-A4NE	LIHC	Dead	660	>=65	FEMALE	G3	Stage IIIA	T3a	M0	N0	None	NO	Yes
TCGA-DD-A4NH	LIHC	Alive	917	>=65	FEMALE	G3	Stage IIIB	T3b	M0	N0	Alcohol consumption	NO	Yes
TCGA-DD-A4NJ	LIHC	Alive	928	<65	FEMALE	G2	Stage II	T2	M0	N0	Nonalcoholic Fatty Liver Disease	NO	Yes
TCGA-DD-A4NK	LIHC	Dead	1210	>=65	FEMALE	G2	Stage IIIA	T3	M0	N0	None	NO	Yes
TCGA-DD-A4NN	LIHC	Dead	899	<65	FEMALE	G3	Stage I	T1	M0	N0	None	NO	Yes
TCGA-DD-A4NR	LIHC	Dead	9	>=65	FEMALE	G3	Stage I	T1	M0	N0	Other	NO	Yes
TCGA-DD-A4NS	LIHC	Dead	2456	<65	FEMALE	G2	Stage I	T1	M0	N0	Alcohol consumption	NO	Yes
TCGA-DD-A73B	LIHC	Dead	283	>=65	FEMALE	G2	Stage I	T1	M0	N0	Alpha-1 Antitrypsin Deficiency|Other(Hepatitis B Surface Antigen)	NO	Yes
TCGA-DD-A73C	LIHC	Alive	701	>=65	FEMALE	G1	Stage IIIA	T3a	M0	N0	None	NO	Yes
TCGA-DD-A73D	LIHC	Alive	693	>=65	FEMALE	G1	Stage II	T2	MX	NX	Hepatitis C	NO	Yes
TCGA-DD-A73F	LIHC	Alive	1085	>=65	FEMALE	G1	Stage I	T1	M0	N0	None	[Unknown]	Yes
TCGA-DD-A73G	LIHC	Alive	3478	>=65	FEMALE	G3	Stage I	T1	M0	N0	None	NO	Yes
TCGA-DD-AA3A	LIHC	Dead	410	>=65	FEMALE	G4	Stage I	T1	MX	N0	None	NO	Yes
TCGA-DD-AACB	LIHC	Alive	2324	>=65	FEMALE	G3	Stage I	T1	M0	N0	Hepatitis B	NO	No
TCGA-DD-AACL	LIHC	Dead	107	>=65	FEMALE	G3	Stage I	T1	M0	N0	Hepatitis C	NO	No
TCGA-DD-AACT	LIHC	Alive	1562	>=65	FEMALE	G2	Stage I	T1	M0	N0	Hepatitis B	NO	No
TCGA-DD-AACZ	LIHC	Dead	171	<65	FEMALE	G4	Stage I	T1	M0	N0	[Unknown]	NO	No
TCGA-DD-AAD0	LIHC	Alive	137	>=65	FEMALE	G2	Stage I	T1	M0	N0	Hepatitis B	NO	No
TCGA-DD-AAD1	LIHC	Alive	564	<65	FEMALE	G4	Stage I	T1	M0	N0	Hepatitis B|Hepatitis C	NO	No
TCGA-DD-AAD8	LIHC	Alive	1219	>=65	FEMALE	G2	Stage I	T1	M0	N0	Hepatitis B|Hepatitis C	NO	No
TCGA-DD-AADA	LIHC	Alive	1233	>=65	FEMALE	G3	Stage I	T1	M0	N0	Hepatitis B	NO	No
TCGA-DD-AADF	LIHC	Dead	115	<65	FEMALE	G4	Stage I	T1	M0	N0	Hepatitis B	NO	No
TCGA-DD-AADI	LIHC	Alive	1085	<65	FEMALE	G3	Stage I	T1	M0	N0	Hepatitis B	NO	No
TCGA-DD-AADJ	LIHC	Alive	1066	>=65	FEMALE	G3	Stage I	T1	M0	N0	[Unknown]	NO	No
TCGA-DD-AADK	LIHC	Alive	1049	>=65	FEMALE	G3	Stage II	T2	M0	N0	Hepatitis B	NO	No
TCGA-DD-AADY	LIHC	Alive	555	<65	FEMALE	G2	Stage I	T1	M0	N0	Hepatitis B	NO	No
TCGA-DD-AAE0	LIHC	Alive	555	<65	FEMALE	G4	Stage IIIA	T3a	M0	N0	Hepatitis B	NO	No
TCGA-DD-AAE4	LIHC	Alive	608	<65	FEMALE	G1	Stage I	T1	M0	N0	Hepatitis B	NO	No
TCGA-DD-AAE6	LIHC	Alive	141	<65	FEMALE	G2	Stage I	T1	M0	N0	[Unknown]	NO	No
TCGA-DD-AAEG	LIHC	Alive	719	<65	FEMALE	G3	Stage I	T1	M0	N0	None	NO	No
TCGA-ED-A5KG	LIHC	Alive	854	<65	FEMALE	G2	Stage II	T2	M0	N0	None	NO	No
TCGA-ED-A66Y	LIHC	Dead	296	<65	FEMALE	G3	Stage IIIA	T3a	M0	N0	None	NO	No
TCGA-ED-A7PX	LIHC	Alive	6	<65	FEMALE	G3	Stage II	T2	M0	NX	None	NO	No
TCGA-ED-A7PY	LIHC	Alive	390	<65	FEMALE	G3	Stage II	T2	M0	NX	None	NO	No
TCGA-ED-A7XP	LIHC	Alive	400	<65	FEMALE	G3	Stage II	T2	M0	N0	None	NO	No
TCGA-ED-A82E	LIHC	Alive	408	<65	FEMALE	G2	Stage IIIA	T3a	M0	N0	None	NO	No
TCGA-ED-A8O5	LIHC	Alive	406	<65	FEMALE	G3	Stage IIIA	T3a	M0	N0	None	NO	No
TCGA-ED-A8O6	LIHC	Dead	56	<65	FEMALE	G3	Stage IIIA	T3a	M0	N0	None	NO	No
TCGA-EP-A2KA	LIHC	Dead	627	<65	FEMALE	G3	Stage IIIA	T3a	MX	NX	None	NO	Yes
TCGA-EP-A2KB	LIHC	Dead	596	<65	FEMALE	G2	Stage I	T1	MX	NX	Hepatitis C	NO	No
TCGA-FV-A23B	LIHC	Dead	1852	>=65	FEMALE	[Not Available]	Stage II	T2	M0	N0	Hepatitis C	NO	[Not Available]
TCGA-FV-A3I0	LIHC	Alive	848	>=65	FEMALE	G2	Stage II	T2	M0	NX	None	NO	[Not Available]
TCGA-FV-A3I1	LIHC	Dead	247	>=65	FEMALE	G2	Stage II	T2	MX	N0	Alcohol consumption	NO	No
TCGA-FV-A3R3	LIHC	Dead	366	<65	FEMALE	G2	Stage I	T1	MX	NX	None	NO	No
TCGA-FV-A495	LIHC	Alive	1	<65	FEMALE	G2	Stage II	T2	M0	NX	Hepatitis C	[Unknown]	Yes
TCGA-FV-A496	LIHC	Alive	10	>=65	FEMALE	G2	Stage I	T1	M0	NX	None	[Unknown]	Yes
TCGA-G3-A25T	LIHC	Alive	1553	<65	FEMALE	G2	Stage IIIA	T3	M0	N0	Hepatitis C	NO	No
TCGA-G3-A25U	LIHC	Alive	1636	<65	FEMALE	G3	Stage I	T1	M0	N0	Hepatitis B	NO	No
TCGA-G3-A25W	LIHC	Alive	935	>=65	FEMALE	G2	Stage IIIB	T3b	M0	N0	None	NO	Yes
TCGA-G3-A25Y	LIHC	Dead	452	<65	FEMALE	G3	Stage I	T1	M0	N0	Hepatitis B	NO	No
TCGA-G3-A7M6	LIHC	Alive	632	<65	FEMALE	G3	Stage I	T1	MX	NX	Hepatitis C	NO	[Unknown]
TCGA-G3-AAV3	LIHC	Alive	412	<65	FEMALE	G2	Stage II	T2	M0	N0	Alcohol consumption|Hepatitis C|Nonalcoholic Fatty Liver Disease	NO	Yes
TCGA-G3-AAV4	LIHC	Dead	27	>=65	FEMALE	G1	Stage I	T1	M0	N0	Hepatitis B	NO	Yes
TCGA-G3-AAV6	LIHC	Dead	65	<65	FEMALE	G3	Stage IIIA	T3a	M0	N0	None	NO	[Unknown]
TCGA-GJ-A6C0	LIHC	Dead	31	>=65	FEMALE	G2	Stage II	T2	MX	NX	None	NO	Yes
TCGA-HP-A5N0	LIHC	Dead	752	>=65	FEMALE	[Not Available]	[Not Available]	TX	M0	NX	None	NO	Yes
TCGA-KR-A7K7	LIHC	Alive	951	<65	FEMALE	G1	Stage II	T2	M0	N0	None	NO	[Unknown]
TCGA-LG-A6GG	LIHC	Alive	387	>=65	FEMALE	G2	Stage II	T2	M0	NX	Other	NO	[Unknown]
TCGA-PD-A5DF	LIHC	Dead	639	<65	FEMALE	G2	Stage IIIB	T4	M0	N0	None	NO	Yes
TCGA-RC-A6M4	LIHC	Alive	22	>=65	FEMALE	G2	Stage IIIA	T3	MX	NX	None	[Unknown]	Yes
TCGA-RC-A6M5	LIHC	Alive	15	<65	FEMALE	G2	Stage IVA	T1	M0	N1	None	[Unknown]	No
TCGA-RC-A7S9	LIHC	Alive	640	<65	FEMALE	G3	Stage I	T1	M0	N0	Hepatitis B	NO	[Unknown]
TCGA-UB-A7MA	LIHC	Alive	848	<65	FEMALE	G2	Stage II	T2b	M0	N0	None	NO	No
TCGA-UB-AA0V	LIHC	Alive	314	>=65	FEMALE	G1	Stage I	T0	MX	NX	Hemochromatosis	NO	Yes
TCGA-WJ-A86L	LIHC	Alive	345	>=65	FEMALE	G2	Stage I	T1	MX	NX	None	NO	No
TCGA-WQ-A9G7	LIHC	Alive	30	>=65	FEMALE	G3	[Not Available]	T3a	M0	NX	None	NO	No
TCGA-WX-AA44	LIHC	Alive	615	<65	FEMALE	G3	Stage I	T1	MX	NX	Nonalcoholic Fatty Liver Disease	YES	No
TCGA-WX-AA47	LIHC	Dead	556	<65	FEMALE	G2	Stage IIIA	T3a	MX	NX	None	YES	No
TCGA-XR-A8TC	LIHC	Alive	1339	<65	FEMALE	G2	Stage I	T1	MX	NX	Hepatitis B	NO	No
TCGA-XR-A8TD	LIHC	Alive	1030	<65	FEMALE	G3	Stage IIIB	T3	M0	N0	None	NO	[Unknown]
TCGA-ZP-A9CY	LIHC	Alive	782	>=65	FEMALE	G1	[Not Available]	T1	MX	NX	Nonalcoholic Fatty Liver Disease	NO	Yes
TCGA-ZP-A9D0	LIHC	Alive	1091	>=65	FEMALE	G1	[Not Available]	T1	MX	NX	Nonalcoholic Fatty Liver Disease	NO	No
TCGA-ZP-A9D1	LIHC	Alive	21	<65	FEMALE	G2	[Not Available]	T1	MX	NX	Nonalcoholic Fatty Liver Disease	NO	Yes
TCGA-ZP-A9D4	LIHC	Alive	395	<65	FEMALE	G1	[Not Available]	T1	MX	NX	None	NO	No
TCGA-ZS-A9CE	LIHC	Alive	1241	>=65	FEMALE	G1	Stage II	T2	MX	NX	[Unknown]	NO	[Unknown]
TCGA-2V-A95S	LIHC	Alive		NA	MALE	G3	Stage II	T2	MX	NX	Other	NO	No
TCGA-2Y-A9GS	LIHC	Dead	724	<65	MALE	G2	Stage IV	T2	MX	NX	Alcohol consumption	NO	[Unknown]
TCGA-2Y-A9GT	LIHC	Dead	1624	<65	MALE	G2	Stage I	T1	MX	NX	Alcohol consumption|Hepatitis B|Hepatitis C	NO	Yes
TCGA-2Y-A9GW	LIHC	Dead	1271	<65	MALE	G2	Stage I	T1	MX	N0	Alcohol consumption	NO	Yes
TCGA-2Y-A9GX	LIHC	Alive	2442	>=65	MALE	G2	Stage I	T1	MX	NX	Alcohol consumption	NO	No
TCGA-2Y-A9H0	LIHC	Alive	3675	<65	MALE	G1	Stage IIIA	T3	M0	N0	Alcohol consumption|Hepatitis B|Hepatitis C	NO	[Not Available]
TCGA-2Y-A9H1	LIHC	Dead	1229	<65	MALE	G2	Stage I	T1	MX	NX	Alcohol consumption|Hepatitis C	NO	No
TCGA-2Y-A9H3	LIHC	Alive	1516	<65	MALE	G1	Stage II	T2	MX	NX	Alcohol consumption|Nonalcoholic Fatty Liver Disease	NO	Yes
TCGA-2Y-A9H4	LIHC	Alive	1452	>=65	MALE	G2	Stage I	T1	MX	N0	Alcohol consumption|Hepatitis B	NO	Yes
TCGA-2Y-A9H9	LIHC	Alive	697	>=65	MALE	G2	Stage I	T1	MX	N0	Alcohol consumption|Hepatitis C	[Unknown]	Yes
TCGA-2Y-A9HA	LIHC	Dead	36	>=65	MALE	G2	Stage II	T2	MX	NX	Alcohol consumption|Hepatitis C	NO	No
TCGA-2Y-A9HB	LIHC	Alive	260	>=65	MALE	G2	Stage I	T1	MX	NX	Alcohol consumption	[Unknown]	No
TCGA-3K-AAZ8	LIHC	Alive	396	>=65	MALE	G1	Stage IIIB	T3b	MX	NX	Hepatitis C	NO	No
TCGA-4R-AA8I	LIHC	Dead	262	>=65	MALE	G2	Stage II	T2	MX	NX	Nonalcoholic Fatty Liver Disease	NO	No
TCGA-5C-A9VG	LIHC	Alive	328	<65	MALE	G2	Stage II	T2	M0	N0	Other	NO	No
TCGA-5C-A9VH	LIHC	Alive	322	>=65	MALE	G2	Stage I	T1	M0	N0	None	NO	No
TCGA-5C-AAPD	LIHC	Alive	20	<65	MALE	G1	Stage II	T2	M0	N0	Hepatitis B	NO	No
TCGA-5R-AA1C	LIHC	Alive	520	<65	MALE	G2	Stage II	T2	M0	N0	None	NO	No
TCGA-BC-4073	LIHC	Alive	849	>=65	MALE	G3	Stage IIIA	T3	MX	N0	Hemochromatosis	NO	Yes
TCGA-BC-A10S	LIHC	Dead	1423	>=65	MALE	G1	[Not Available]	T3	MX	NX	Alcohol consumption	NO	No
TCGA-BC-A10T	LIHC	Dead	837	>=65	MALE	G1	[Not Available]	T4	MX	NX	None	NO	No
TCGA-BC-A10U	LIHC	Dead	837	>=65	MALE	G2	[Not Available]	T2	MX	NX	Alcohol consumption	NO	Yes
TCGA-BC-A10W	LIHC	Dead	91	<65	MALE	G3	[Not Available]	T4	MX	NX	Hepatitis B	NO	Yes
TCGA-BC-A10Y	LIHC	Dead	711	>=65	MALE	G3	[Not Available]	T4	MX	NX	Alcohol consumption	NO	No
TCGA-BC-A112	LIHC	Dead	153	>=65	MALE	G2	[Not Available]	T3	MX	NX	Alcohol consumption	NO	No
TCGA-BC-A5W4	LIHC	Dead	547	>=65	MALE	G3	Stage IIIA	T3a	M0	NX	Alcohol consumption	NO	No
TCGA-BC-A69H	LIHC	Alive	444	<65	MALE	G3	Stage II	T2	M0	NX	Alcohol consumption	NO	No
TCGA-BC-A69I	LIHC	Alive	387	>=65	MALE	G1	Stage I	T1	M0	N0	None	NO	Yes
TCGA-BD-A2L6	LIHC	Alive	1363	>=65	MALE	G2	[Not Available]	T2	MX	NX	Alcohol consumption	NO	[Not Available]
TCGA-BD-A3ER	LIHC	Alive	1115	<65	MALE	G2	Stage II	T2	MX	NX	Hemochromatosis	NO	No
TCGA-BW-A5NO	LIHC	Alive	20	<65	MALE	G2	Stage IIIA	T3a	MX	NX	Hepatitis C	NO	[Unknown]
TCGA-BW-A5NQ	LIHC	Alive	0	<65	MALE	G3	Stage I	T1	MX	NX	Alcohol consumption|Other	[Unknown]	[Unknown]
TCGA-CC-5258	LIHC	Dead	129	<65	MALE	G2	Stage II	T2	M0	N0	[Not Available]	NO	No
TCGA-CC-5261	LIHC	Dead	97	<65	MALE	G2	Stage II	T2	M0	N0	[Not Available]	NO	[Not Available]
TCGA-CC-5262	LIHC	Dead	103	>=65	MALE	G1	Stage IIIC	T4	M0	N0	None	NO	No
TCGA-CC-5263	LIHC	Dead	129	<65	MALE	G1	Stage IIIA	T3	M0	N0	None	NO	No
TCGA-CC-5264	LIHC	Dead	102	>=65	MALE	G2	Stage IIIA	T3	M0	N0	[Not Available]	NO	[Not Available]
TCGA-CC-A1HT	LIHC	Dead	101	<65	MALE	G3	Stage IIIA	T3	M0	N0	None	NO	No
TCGA-CC-A3M9	LIHC	Dead	300	<65	MALE	G3	Stage IIIA	T3	M0	N0	Alcohol consumption	NO	No
TCGA-CC-A3MA	LIHC	Dead	303	<65	MALE	G2	Stage IIIA	T3	M0	N0	Alcohol consumption	NO	No
TCGA-CC-A3MB	LIHC	Dead	315	<65	MALE	G1	Stage IIIA	T3	M0	N0	None	NO	No
TCGA-CC-A3MC	LIHC	Alive	363	<65	MALE	G2	Stage IIIA	T3	M0	N0	Alcohol consumption	NO	No
TCGA-CC-A5UC	LIHC	Dead	347	<65	MALE	G3	Stage IIIA	T3	M0	N0	Alcohol consumption	NO	No
TCGA-CC-A5UD	LIHC	Dead	304	<65	MALE	G2	Stage IIIA	T3	M0	N0	Alcohol consumption	NO	No
TCGA-CC-A5UE	LIHC	Dead	272	<65	MALE	G2	Stage IIIB	T4	M0	N0	Alcohol consumption	NO	No
TCGA-CC-A7IE	LIHC	Dead	217	<65	MALE	G2	Stage IIIA	T3	M0	N0	Alcohol consumption	NO	No
TCGA-CC-A7IF	LIHC	Dead	649	<65	MALE	G1	Stage IIIA	T3	M0	N0	Alcohol consumption	NO	No
TCGA-CC-A7IG	LIHC	Dead	299	<65	MALE	G2	Stage II	T2	M0	N0	Alcohol consumption	NO	No
TCGA-CC-A7IH	LIHC	Alive	365	<65	MALE	G1	Stage IIIA	T3	M0	N0	Alcohol consumption	NO	No
TCGA-CC-A7II	LIHC	Alive	399	<65	MALE	G3	Stage IIIA	T3	M0	N0	Alcohol consumption	NO	No
TCGA-CC-A7IJ	LIHC	Alive	382	<65	MALE	G3	Stage II	T2	M0	N0	Alcohol consumption	NO	No
TCGA-CC-A7IK	LIHC	Dead	262	<65	MALE	G3	Stage IIIA	T3	M0	N0	Alcohol consumption	NO	No
TCGA-CC-A7IL	LIHC	Dead	278	<65	MALE	G1	Stage IIIA	T3	M0	N0	Alcohol consumption	NO	No
TCGA-CC-A8HS	LIHC	Dead	300	<65	MALE	G1	Stage IIIC	T3	M0	N1	None	NO	No
TCGA-CC-A8HT	LIHC	Dead	140	>=65	MALE	G2	Stage IIIA	T3	M0	N0	Alcohol consumption	NO	No
TCGA-CC-A9FS	LIHC	Alive	211	<65	MALE	G2	Stage II	T2	M0	N0	Alcohol consumption	NO	No
TCGA-CC-A9FV	LIHC	Alive	0	<65	MALE	G2	Stage IIIA	T3	M0	N0	Alcohol consumption	[Unknown]	No
TCGA-CC-A9FW	LIHC	Alive	248	>=65	MALE	G2	Stage IIIA	T3	M0	N0	Alcohol consumption	NO	No
TCGA-DD-A114	LIHC	Dead	1149	<65	MALE	G3	Stage II	T2	M0	[Not Available]	Hepatitis C	NO	No
TCGA-DD-A115	LIHC	Dead	2542	<65	MALE	G2	Stage IIIA	T3	M0	N0	Alcohol consumption	NO	No
TCGA-DD-A116	LIHC	Dead	1622	>=65	MALE	G3	Stage IIIA	T3	M0	N0	Hepatitis B	YES	No
TCGA-DD-A119	LIHC	Dead	223	<65	MALE	G3	Stage IV	T3a	M1	N0	Hepatitis B	[Unknown]	Yes
TCGA-DD-A11A	LIHC	Alive	79	>=65	MALE	G3	Stage I	T1	M0	N0	Other	[Unknown]	No
TCGA-DD-A11B	LIHC	Dead	14	>=65	MALE	G2	Stage I	T1	M0	N0	Nonalcoholic Fatty Liver Disease	NO	No
TCGA-DD-A11C	LIHC	Alive	662	>=65	MALE	G3	Stage I	T1	M0	N0	[Not Available]	NO	Yes
TCGA-DD-A1E9	LIHC	Dead	2759	>=65	MALE	G2	Stage I	T1	M0	N0	Alcohol consumption	NO	Yes
TCGA-DD-A1EA	LIHC	Alive	2415	>=65	MALE	G2	Stage II	T2	M0	N0	Hepatitis B	NO	Yes
TCGA-DD-A1ED	LIHC	Alive	2301	>=65	MALE	G1	Stage I	T1	M0	N0	Alcohol consumption	NO	No
TCGA-DD-A1EE	LIHC	Dead	349	>=65	MALE	G3	Stage IIIA	T3	M0	N0	Hepatitis C	NO	No
TCGA-DD-A1EG	LIHC	Dead	1372	>=65	MALE	G3	Stage I	T1	M0	N0	Alcohol consumption|Nonalcoholic Fatty Liver Disease	NO	Yes
TCGA-DD-A1EH	LIHC	Alive	1495	<65	MALE	G3	Stage III	T3	M0	N0	Hepatitis B	NO	Yes
TCGA-DD-A1EI	LIHC	Alive	183	<65	MALE	G2	Stage I	T1	M0	N0	Hepatitis B	[Unknown]	No
TCGA-DD-A1EL	LIHC	Dead	415	<65	MALE	G3	Stage II	T2	M0	N0	Hepatitis B	NO	No
TCGA-DD-A39V	LIHC	Dead	643	>=65	MALE	G3	Stage II	T2	M0	NX	None	YES	Yes
TCGA-DD-A39Y	LIHC	Dead	171	>=65	MALE	G3	Stage I	T1	M0	NX	None	NO	Yes
TCGA-DD-A3A0	LIHC	Dead	785	>=65	MALE	G2	Stage I	T1	M0	NX	None	NO	No
TCGA-DD-A3A1	LIHC	Dead	233	>=65	MALE	G2	Stage IIIA	T3b	M0	N0	None	NO	Yes
TCGA-DD-A3A3	LIHC	Dead	535	<65	MALE	G2	Stage I	T1	M0	N0	None	[Unknown]	No
TCGA-DD-A3A4	LIHC	Dead	612	<65	MALE	G3	Stage IIIA	T3	M0	N0	Other	NO	Yes
TCGA-DD-A3A7	LIHC	Dead	419	>=65	MALE	G3	Stage IIIB	T3b	M0	N0	Alcohol consumption|Other	NO	Yes
TCGA-DD-A3A8	LIHC	Dead	11	>=65	MALE	G2	Stage II	T2	M0	N0	None	NO	Yes
TCGA-DD-A4NB	LIHC	Alive	989	<65	MALE	G2	Stage I	T1	M0	N0	None	NO	Yes
TCGA-DD-A4NF	LIHC	Alive	942	>=65	MALE	G2	Stage I	T1	M0	N0	Hepatitis C	NO	No
TCGA-DD-A4NG	LIHC	Dead	802	>=65	MALE	G2	Stage IIIA	T3a	M0	NX	Alcohol consumption	NO	Yes
TCGA-DD-A4NI	LIHC	Alive	816	>=65	MALE	G2	Stage II	T2	M0	NX	Alcohol consumption|Nonalcoholic Fatty Liver Disease	NO	Yes
TCGA-DD-A4NL	LIHC	Alive	1711	<65	MALE	G1	Stage I	T1	M0	N0	Alcohol consumption|Other	NO	No
TCGA-DD-A4NO	LIHC	Alive	2245	>=65	MALE	G1	Stage I	T1	M0	N0	Hepatitis C|Other	NO	No
TCGA-DD-A4NP	LIHC	Alive	3308	<65	MALE	G3	Stage I	T1	M0	N0	None	NO	No
TCGA-DD-A4NQ	LIHC	Dead	373	<65	MALE	G3	Stage II	T2	M0	N0	Hepatitis B|Other	NO	Yes
TCGA-DD-A4NV	LIHC	Alive	2398	<65	MALE	G1	Stage IIIA	T3	M0	N0	Nonalcoholic Fatty Liver Disease|Other	NO	Yes
TCGA-DD-A73A	LIHC	Alive	728	>=65	MALE	G2	Stage I	T1	M0	N0	Alcohol consumption	NO	No
TCGA-DD-A73E	LIHC	Alive	44	>=65	MALE	G1	Stage I	T1	M0	N0	Alcohol consumption|Nonalcoholic Fatty Liver Disease	NO	Yes
TCGA-DD-AAC8	LIHC	Dead	16	>=65	MALE	G3	Stage I	T1	M0	N0	Hepatitis B	NO	No
TCGA-DD-AAC9	LIHC	Alive	347	<65	MALE	G2	Stage I	T1	M0	N0	Hepatitis B	NO	No
TCGA-DD-AACA	LIHC	Alive	2301	>=65	MALE	G3	Stage I	T1	M0	N0	Hepatitis B	NO	No
TCGA-DD-AACC	LIHC	Dead	1685	<65	MALE	G2	Stage I	T1	M0	N0	Hepatitis B	NO	No
TCGA-DD-AACD	LIHC	Dead	381	<65	MALE	G4	Stage I	T1	M0	N0	Hepatitis B	NO	Yes
TCGA-DD-AACE	LIHC	Alive	2184	<65	MALE	G3	Stage I	T1	M0	N0	Hepatitis B	NO	No
TCGA-DD-AACF	LIHC	Dead	365	>=65	MALE	G3	Stage I	T1	M0	N0	Hepatitis C	NO	No
TCGA-DD-AACG	LIHC	Dead	469	<65	MALE	G4	Stage II	T2	M0	N0	Hepatitis B	NO	No
TCGA-DD-AACH	LIHC	Dead	195	>=65	MALE	G3	Stage II	T2	M0	N0	Hepatitis B	NO	No
TCGA-DD-AACI	LIHC	Alive	1618	>=65	MALE	G3	Stage II	T2	M0	N0	[Unknown]	NO	No
TCGA-DD-AACJ	LIHC	Alive	2102	>=65	MALE	G2	Stage II	T2	M0	N0	[Unknown]	NO	No
TCGA-DD-AACK	LIHC	Alive	9	>=65	MALE	G2	Stage I	T1	M0	N0	Hepatitis B	[Unknown]	No
TCGA-DD-AACM	LIHC	Alive	1769	<65	MALE	G3	Stage II	T2	M0	N0	Hepatitis B	NO	No
TCGA-DD-AACN	LIHC	Alive	1302	<65	MALE	G3	Stage I	T1	M0	N0	Hepatitis B	NO	No
TCGA-DD-AACO	LIHC	Alive	1876	<65	MALE	G3	Stage I	T1	M0	N0	Hepatitis B	NO	No
TCGA-DD-AACP	LIHC	Alive	415	<65	MALE	G3	Stage I	T1	M0	N0	Alcohol consumption	NO	No
TCGA-DD-AACQ	LIHC	Dead	432	<65	MALE	G3	Stage II	T2	M0	N0	Hepatitis B	NO	No
TCGA-DD-AACS	LIHC	Alive	1804	<65	MALE	G3	Stage I	T1	M0	N0	Hepatitis B	NO	No
TCGA-DD-AACU	LIHC	Alive	1567	<65	MALE	G3	Stage I	T1	M0	N0	Hepatitis B	NO	No
TCGA-DD-AACV	LIHC	Alive	1531	<65	MALE	G3	Stage I	T1	M0	N0	Alcohol consumption	NO	No
TCGA-DD-AACW	LIHC	Alive	1424	<65	MALE	G3	Stage I	T1	M0	N0	Alcohol consumption|Hepatitis B	NO	No
TCGA-DD-AACX	LIHC	Alive	170	>=65	MALE	G3	Stage II	T2	M0	N0	Alcohol consumption|Hepatitis B	NO	No
TCGA-DD-AACY	LIHC	Alive	1450	<65	MALE	G3	Stage I	T1	M0	N0	Hepatitis B	NO	No
TCGA-DD-AAD2	LIHC	Alive	658	>=65	MALE	G2	Stage I	T1	M0	N0	Hepatitis B	NO	No
TCGA-DD-AAD3	LIHC	Alive	1295	<65	MALE	G2	Stage I	T1	M0	N0	Alcohol consumption|Hepatitis B	NO	No
TCGA-DD-AAD5	LIHC	Alive	1345	<65	MALE	G3	Stage I	T1	M0	N0	Alcohol consumption|Hepatitis B	NO	No
TCGA-DD-AAD6	LIHC	Alive	672	>=65	MALE	G3	Stage IIIA	T3a	M0	N0	Hepatitis B	NO	No
TCGA-DD-AADB	LIHC	Alive	1242	<65	MALE	G4	Stage I	T1	M0	N0	Hepatitis B	NO	No
TCGA-DD-AADC	LIHC	Dead	425	<65	MALE	G3	Stage I	T1	M0	N0	Hepatitis B	NO	No
TCGA-DD-AADD	LIHC	Alive	1231	<65	MALE	G4	Stage I	T1	M0	N0	Hepatitis B	NO	No
TCGA-DD-AADE	LIHC	Alive	1202	<65	MALE	G4	Stage I	T1	M0	N0	Hepatitis B	NO	No
TCGA-DD-AADG	LIHC	Alive	1145	>=65	MALE	G3	Stage IIIA	T3a	M0	N0	Alcohol consumption|Hepatitis B	NO	No
TCGA-DD-AADL	LIHC	Alive	636	<65	MALE	G4	Stage I	T1	M0	N0	Alcohol consumption|Hepatitis B	NO	Yes
TCGA-DD-AADM	LIHC	Dead	12	<65	MALE	G3	Stage II	T2	M0	N0	Alcohol consumption|Hepatitis B	NO	No
TCGA-DD-AADN	LIHC	Alive	898	<65	MALE	G4	Stage I	T1	MX	NX	Alcohol consumption|Hepatitis B	NO	No
TCGA-DD-AADO	LIHC	Alive	453	<65	MALE	G3	Stage I	T1	M0	N0	Alcohol consumption|Hepatitis B	NO	No
TCGA-DD-AADP	LIHC	Alive	458	<65	MALE	G3	Stage I	T1	M0	N0	Hepatitis B	NO	No
TCGA-DD-AADQ	LIHC	Alive	436	<65	MALE	G3	Stage II	T2	M0	N0	Alcohol consumption|Hepatitis B	NO	No
TCGA-DD-AADR	LIHC	Alive	2028	<65	MALE	G3	Stage I	T1	M0	N0	Alcohol consumption|Hepatitis B	NO	No
TCGA-DD-AADS	LIHC	Alive	474	<65	MALE	G2	Stage I	T1	M0	N0	Alcohol consumption|Hepatitis C	NO	Yes
TCGA-DD-AADU	LIHC	Alive	554	<65	MALE	G3	Stage II	T2	M0	N0	Alcohol consumption	NO	Yes
TCGA-DD-AADV	LIHC	Alive	574	<65	MALE	G3	Stage I	T1	M0	N0	Alcohol consumption|Hepatitis B	NO	No
TCGA-DD-AADW	LIHC	Alive	587	<65	MALE	G3	Stage I	T1	M0	N0	Hepatitis B	NO	No
TCGA-DD-AAE1	LIHC	Alive	552	<65	MALE	G3	Stage I	T1	M0	N0	Hepatitis B	NO	No
TCGA-DD-AAE2	LIHC	Alive	638	<65	MALE	G3	Stage I	T1	M0	N0	Hepatitis B	NO	No
TCGA-DD-AAE3	LIHC	Alive	566	<65	MALE	G2	Stage I	T1	M0	N0	Alcohol consumption|Hepatitis B	NO	No
TCGA-DD-AAE7	LIHC	Alive	644	>=65	MALE	G2	Stage I	T1	M0	N0	Alcohol consumption|Hepatitis B	NO	No
TCGA-DD-AAE8	LIHC	Alive	664	<65	MALE	G3	Stage I	T1	M0	N0	Hepatitis B	NO	No
TCGA-DD-AAE9	LIHC	Alive	722	>=65	MALE	G3	Stage I	T1	M0	N0	Alcohol consumption|Hepatitis B	NO	No
TCGA-DD-AAEA	LIHC	Alive	575	>=65	MALE	G3	Stage I	T1	M0	N0	Alcohol consumption|Hepatitis B	NO	No
TCGA-DD-AAEB	LIHC	Alive	478	<65	MALE	G2	Stage I	T1	M0	N0	Alcohol consumption|Hepatitis B	NO	No
TCGA-DD-AAED	LIHC	Alive	763	<65	MALE	G3	Stage I	T1	M0	N0	Alcohol consumption|Hepatitis B	NO	No
TCGA-DD-AAEE	LIHC	Alive	810	<65	MALE	G4	Stage I	T1	M0	N0	Hepatitis B	NO	No
TCGA-DD-AAEH	LIHC	Alive	784	>=65	MALE	G2	Stage I	T1	M0	N0	[Unknown]	NO	No
TCGA-DD-AAEI	LIHC	Alive	1531	>=65	MALE	G2	Stage I	T1	M0	N0	Hepatitis B	NO	No
TCGA-DD-AAEK	LIHC	Alive	1067	<65	MALE	G3	Stage II	T2	M0	N0	Hepatitis B	NO	No
TCGA-DD-AAVP	LIHC	Alive	2752	<65	MALE	G1	Stage I	T1	M0	N0	Hepatitis B	NO	Yes
TCGA-DD-AAVQ	LIHC	Alive	2728	<65	MALE	G2	Stage I	T1	M0	N0	Hepatitis B	NO	No
TCGA-DD-AAVR	LIHC	Alive	2513	<65	MALE	G2	Stage I	T1	M0	N0	Hepatitis B	NO	Yes
TCGA-DD-AAVS	LIHC	Alive	1823	<65	MALE	G2	Stage I	T1	M0	N0	Hepatitis B	NO	No
TCGA-DD-AAVU	LIHC	Alive	2202	<65	MALE	G2	Stage II	T2	M0	N0	Hepatitis B	NO	No
TCGA-DD-AAVV	LIHC	Alive	2455	<65	MALE	G3	Stage II	T2	M0	N0	Hepatitis B	NO	No
TCGA-DD-AAVW	LIHC	Alive	2317	<65	MALE	G2	Stage I	T1	M0	N0	Hepatitis B	NO	No
TCGA-DD-AAVX	LIHC	Alive	1718	<65	MALE	G2	Stage II	T2	M0	N0	Hepatitis B	YES	Yes
TCGA-DD-AAVY	LIHC	Alive	1970	<65	MALE	G2	Stage IIIA	T3	M0	N0	None	NO	Yes
TCGA-DD-AAVZ	LIHC	Alive	1900	<65	MALE	G2	Stage I	T1	M0	N0	Hepatitis B	NO	Yes
TCGA-DD-AAW0	LIHC	Alive	2015	<65	MALE	G2	Stage I	T1	M0	N0	Hepatitis B	NO	Yes
TCGA-DD-AAW1	LIHC	Alive	1989	<65	MALE	G2	Stage IIIA	T3	M0	N0	None	NO	No
TCGA-DD-AAW2	LIHC	Alive	1855	>=65	MALE	G2	Stage I	T1	M0	N0	Nonalcoholic Fatty Liver Disease	[Discrepancy]	Yes
TCGA-DD-AAW3	LIHC	Alive	1633	>=65	MALE	G2	Stage I	T1	M0	N0	None	NO	Yes
TCGA-ED-A459	LIHC	Alive	910	<65	MALE	G2	Stage II	T2	M0	N0	[Unknown]	YES	No
TCGA-ED-A4XI	LIHC	Alive	819	<65	MALE	G3	Stage II	T2	M0	N0	None	NO	No
TCGA-ED-A627	LIHC	Alive	423	>=65	MALE	G2	Stage I	T1	M0	NX	Alcohol consumption	NO	[Unknown]
TCGA-ED-A66X	LIHC	Alive	406	<65	MALE	G3	Stage IIIA	T3a	M0	N0	Alcohol consumption	[Unknown]	No
TCGA-ED-A7PZ	LIHC	Alive	6	<65	MALE	G2	Stage II	T2	M0	NX	None	NO	No
TCGA-ED-A7XO	LIHC	Alive	427	<65	MALE	G2	Stage IIIA	T3a	M0	N0	None	NO	No
TCGA-ED-A97K	LIHC	Alive	6	<65	MALE	G2	Stage IIIA	T3a	M0	N0	Alcohol consumption	NO	No
TCGA-EP-A12J	LIHC	Alive	570	<65	MALE	G1	Stage I	T1	MX	NX	Hepatitis C	NO	Yes
TCGA-EP-A26S	LIHC	Alive	608	>=65	MALE	G2	Stage I	T1	MX	N0	Alcohol consumption	NO	No
TCGA-EP-A2KC	LIHC	Dead	19	<65	MALE	G3	Stage I	T1	MX	NX	Hepatitis C	NO	No
TCGA-EP-A3JL	LIHC	Alive	303	>=65	MALE	G2	Stage I	T1	MX	NX	Alcohol consumption	NO	No
TCGA-EP-A3RK	LIHC	Alive	363	>=65	MALE	G2	Stage IIIA	T3a	MX	NX	Alcohol consumption	NO	No
TCGA-ES-A2HS	LIHC	Dead	688	>=65	MALE	G2	Stage I	T1	MX	NX	None	[Not Available]	No
TCGA-ES-A2HT	LIHC	Dead	438	<65	MALE	G2	Stage I	T1	MX	NX	Hepatitis C	[Not Available]	No
TCGA-FV-A2QQ	LIHC	Alive	729	>=65	MALE	G2	Stage I	T1	MX	N0	Alcohol consumption	NO	[Unknown]
TCGA-FV-A2QR	LIHC	Dead	581	>=65	MALE	G1	Stage I	T1	M0	N0	Other	NO	Yes
TCGA-FV-A3R2	LIHC	Dead	194	>=65	MALE	[Not Available]	Stage I	T1	MX	NX	None	NO	Yes
TCGA-FV-A4ZP	LIHC	Dead	2486	>=65	MALE	G2	Stage IIIA	T3	M0	NX	Alcohol consumption	NO	[Unknown]
TCGA-FV-A4ZQ	LIHC	Alive	12	<65	MALE	G2	Stage I	T1	M0	NX	Hepatitis C	[Unknown]	[Unknown]
TCGA-G3-A25S	LIHC	Dead	416	<65	MALE	G2	Stage I	T1	M0	N0	Alcohol consumption	NO	No
TCGA-G3-A25V	LIHC	Alive	860	>=65	MALE	G2	Stage I	T1	M0	N0	Alcohol consumption	NO	No
TCGA-G3-A25X	LIHC	Alive	1779	>=65	MALE	G3	Stage II	T2	M0	N0	Hepatitis B	NO	No
TCGA-G3-A25Z	LIHC	Alive	655	<65	MALE	G2	Stage I	T1	M0	N0	Hepatitis B	NO	Yes
TCGA-G3-A3CG	LIHC	Alive	673	>=65	MALE	G2	Stage I	T1	M0	N0	Hepatitis C	NO	No
TCGA-G3-A3CH	LIHC	Alive	780	<65	MALE	G2	Stage IIIA	T3a	M0	N0	Hepatitis B	NO	No
TCGA-G3-A3CI	LIHC	Alive	180	>=65	MALE	G2	Stage I	T1	M0	N0	Nonalcoholic Fatty Liver Disease	[Unknown]	No
TCGA-G3-A3CJ	LIHC	Alive	594	<65	MALE	G2	Stage II	T2	M0	N0	Hepatitis C	NO	No
TCGA-G3-A3CK	LIHC	Alive	585	<65	MALE	G2	Stage I	T1	M0	N0	Hepatitis B	NO	Yes
TCGA-G3-A5SI	LIHC	Dead	768	<65	MALE	G2	Stage II	T2	M0	N0	Hepatitis C	NO	[Unknown]
TCGA-G3-A5SJ	LIHC	Alive	698	<65	MALE	G2	Stage I	T1	M0	NX	Alcohol consumption|Hepatitis C	NO	No
TCGA-G3-A5SK	LIHC	Alive	744	<65	MALE	G1	Stage I	T1	M0	NX	Hepatitis C	NO	[Unknown]
TCGA-G3-A5SL	LIHC	Alive	621	>=65	MALE	G2	Stage II	T2	M0	NX	Alcohol consumption	NO	No
TCGA-G3-A5SM	LIHC	Alive	520	<65	MALE	G3	Stage II	T2	M0	NX	Alcohol consumption|Hepatitis C	NO	No
TCGA-G3-A6UC	LIHC	Alive	671	>=65	MALE	G2	Stage IIIB	T3b	M0	N0	Alcohol consumption	NO	[Unknown]
TCGA-G3-A7M5	LIHC	Alive	447	>=65	MALE	G2	Stage I	T1	MX	NX	Alcohol consumption	NO	No
TCGA-G3-A7M7	LIHC	Alive	361	>=65	MALE	G1	Stage I	T1	MX	NX	Alcohol consumption	NO	[Unknown]
TCGA-G3-A7M8	LIHC	Alive	430	<65	MALE	G1	Stage I	T1	MX	NX	Alcohol consumption	NO	[Unknown]
TCGA-G3-A7M9	LIHC	Dead	56	>=65	MALE	G2	Stage IIIB	T3b	MX	NX	Hemochromatosis	NO	[Unknown]
TCGA-G3-AAUZ	LIHC	Alive	480	<65	MALE	G2	Stage I	T1	M0	N0	Hepatitis B|Nonalcoholic Fatty Liver Disease	NO	[Unknown]
TCGA-G3-AAV0	LIHC	Alive	476	<65	MALE	G2	Stage I	T1	M0	N0	Hepatitis B	NO	[Unknown]
TCGA-G3-AAV1	LIHC	Dead	359	<65	MALE	G3	Stage IIIC	T4	M0	N0	Hepatitis B	NO	[Unknown]
TCGA-G3-AAV2	LIHC	Alive	372	<65	MALE	G1	Stage I	T1	M0	N0	Alcohol consumption|Hepatitis C	NO	[Unknown]
TCGA-G3-AAV5	LIHC	Alive	354	>=65	MALE	G2	Stage II	T2	M0	N0	Alcohol consumption	[Discrepancy]	[Unknown]
TCGA-G3-AAV7	LIHC	Alive	361	<65	MALE	G2	Stage II	T2	M0	N0	Hepatitis B	NO	[Unknown]
TCGA-GJ-A3OU	LIHC	Alive	879	<65	MALE	G2	Stage I	T1	MX	NX	Alcohol consumption|Nonalcoholic Fatty Liver Disease|Other	NO	Yes
TCGA-GJ-A9DB	LIHC	Dead	67	>=65	MALE	G2	Stage I	T1	MX	N0	None	NO	Yes
TCGA-HP-A5MZ	LIHC	Dead	91	>=65	MALE	G2	Stage I	T1	M0	NX	None	NO	[Unknown]
TCGA-K7-A5RF	LIHC	Alive	631	<65	MALE	G1	Stage I	T1	MX	NX	Hepatitis C	NO	No
TCGA-K7-A5RG	LIHC	Alive	519	>=65	MALE	G1	Stage I	T1	MX	NX	Alcohol consumption|Hepatitis C	NO	Yes
TCGA-K7-A6G5	LIHC	Alive	512	>=65	MALE	G2	Stage I	T1	MX	N0	Alcohol consumption|Hepatitis B|Hepatitis C|Hemochromatosis	NO	[Not Available]
TCGA-K7-AAU7	LIHC	Alive	359	<65	MALE	G2	Stage II	T2a	MX	NX	Hepatitis C|Hemochromatosis	NO	Yes
TCGA-KR-A7K0	LIHC	Dead	65	>=65	MALE	G1	Stage I	T1	M0	N0	Alcohol consumption|Hepatitis C	NO	No
TCGA-KR-A7K2	LIHC	Alive	829	<65	MALE	G1	Stage I	T1	M0	N0	Hepatitis C	NO	[Unknown]
TCGA-KR-A7K8	LIHC	Alive	906	<65	MALE	G1	Stage I	T1	M0	N0	None	NO	Yes
TCGA-LG-A9QC	LIHC	Alive	425	<65	MALE	G2	Stage I	T1	M0	NX	None	NO	Yes
TCGA-LG-A9QD	LIHC	Alive	366	>=65	MALE	G2	Stage IIIA	T3a	M0	N0	None	NO	Yes
TCGA-MI-A75C	LIHC	Alive	291	<65	MALE	G3	Stage I	T1	M0	N0	Hepatitis C	NO	[Unknown]
TCGA-MI-A75E	LIHC	Alive	507	<65	MALE	G2	Stage IIIC	T4	M0	N0	Alcohol consumption|Hepatitis C	NO	Yes
TCGA-MI-A75G	LIHC	Alive	698	<65	MALE	G2	Stage II	T2	M0	N0	Alcohol consumption|Hepatitis C	NO	Yes
TCGA-MI-A75H	LIHC	Alive	747	>=65	MALE	[Not Available]	[Not Available]	[Not Available]	MX	NX	Hepatitis C	NO	[Unknown]
TCGA-MI-A75I	LIHC	Alive	630	<65	MALE	G1	[Not Available]	T2	MX	NX	Hepatitis C	NO	Yes
TCGA-MR-A520	LIHC	Alive	229	<65	MALE	G1	Stage I	T1	MX	NX	Other	NO	[Not Available]
TCGA-MR-A8JO	LIHC	Alive	330	<65	MALE	G3	Stage I	T1	MX	N0	Alcohol consumption	NO	No
TCGA-NI-A4U2	LIHC	Dead	1791	>=65	MALE	G1	Stage IIIA	T3	MX	NX	Alcohol consumption	NO	Yes
TCGA-NI-A8LF	LIHC	Alive	799	>=65	MALE	G3	Stage I	T1	MX	NX	Alcohol consumption	NO	Yes
TCGA-O8-A75V	LIHC	Alive	538	<65	MALE	G2	Stage I	T1	MX	NX	Alcohol consumption|Hepatitis B|Hepatitis C	NO	Yes
TCGA-QA-A7B7	LIHC	Alive	94	<65	MALE	G2	Stage II	T2	MX	NX	Hepatitis B	NO	No
TCGA-RC-A6M3	LIHC	Alive	0	<65	MALE	G3	Stage II	T2	M0	N0	[Unknown]	[Unknown]	No
TCGA-RC-A6M6	LIHC	Alive	9	>=65	MALE	G3	Stage II	T2	M0	NX	Alcohol consumption	[Unknown]	[Unknown]
TCGA-RC-A7SB	LIHC	Alive	588	<65	MALE	G2	Stage II	T2	M0	N0	Hepatitis B	NO	[Unknown]
TCGA-RC-A7SF	LIHC	Alive	579	>=65	MALE	G2	Stage I	T1	M0	N0	Hepatitis C	NO	[Unknown]
TCGA-RC-A7SH	LIHC	Alive	468	<65	MALE	G3	Stage II	T2	M0	N0	Hepatitis B	NO	[Unknown]
TCGA-RC-A7SK	LIHC	Alive	472	<65	MALE	G3	Stage I	T1	M0	N0	Hepatitis C	NO	[Unknown]
TCGA-RG-A7D4	LIHC	Alive	1098	>=65	MALE	G2	Stage II	T2	M0	N0	Hepatitis C	NO	Yes
TCGA-T1-A6J8	LIHC	Alive	23	>=65	MALE	G2	[Not Available]	T1	M0	NX	Alcohol consumption	[Unknown]	[Unknown]
TCGA-UB-A7MB	LIHC	Alive	601	<65	MALE	G3	Stage II	T2	MX	NX	None	NO	No
TCGA-UB-A7MC	LIHC	Alive	500	<65	MALE	G3	Stage IIIA	T3a	MX	N0	Alcohol consumption|Hepatitis B	NO	No
TCGA-UB-A7MD	LIHC	Dead	52	>=65	MALE	G3	Stage I	T1	MX	N0	Alcohol consumption|Hepatitis C	NO	No
TCGA-UB-A7ME	LIHC	Alive	486	<65	MALE	G2	Stage I	T1	MX	NX	Hepatitis B	NO	No
TCGA-UB-A7MF	LIHC	Dead	214	<65	MALE	G2	Stage IIIA	T3a	MX	NX	Hepatitis B|Hepatitis C	NO	Yes
TCGA-UB-AA0U	LIHC	Alive	327	<65	MALE	G2	Stage II	T2	MX	NX	Nonalcoholic Fatty Liver Disease	NO	Yes
TCGA-WQ-AB4B	LIHC	Alive	395	<65	MALE	G2	Stage II	T2	M0	NX	Alcohol consumption|Nonalcoholic Fatty Liver Disease|Other	NO	No
TCGA-WX-AA46	LIHC	Alive	756	<65	MALE	G1	Stage II	T2	MX	NX	None	NO	Yes
TCGA-XR-A8TE	LIHC	Alive	925	<65	MALE	G1	Stage IIIA	T3	MX	N0	None	NO	No
TCGA-XR-A8TF	LIHC	Dead	693	>=65	MALE	G1	Stage I	T1	MX	NX	Hepatitis B	NO	No
TCGA-XR-A8TG	LIHC	Alive	898	<65	MALE	G2	Stage I	T1	M0	NX	Hepatitis C	YES	Yes
TCGA-YA-A8S7	LIHC	Dead	412	>=65	MALE	G3	Stage IIIA	T3a	MX	N0	Hepatitis C	NO	No
TCGA-ZP-A9CV	LIHC	Dead	1088	<65	MALE	G1	[Not Available]	T1	MX	NX	Alcohol consumption|Hepatitis C	NO	No
TCGA-ZP-A9CZ	LIHC	Alive	706	>=65	MALE	G1	[Not Available]	T1	MX	NX	Hepatitis B	NO	Yes
TCGA-ZP-A9D2	LIHC	Dead	765	<65	MALE	G2	[Not Available]	T2	MX	NX	Hepatitis C	NO	Yes
TCGA-ZS-A9CD	LIHC	Dead	1386	>=65	MALE	G2	Stage II	T2	MX	NX	[Unknown]	NO	[Unknown]
TCGA-ZS-A9CF	LIHC	Alive	2412	<65	MALE	G2	Stage II	T2	MX	NX	Hemochromatosis	NO	[Unknown]
TCGA-ZS-A9CG	LIHC	Alive	341	<65	MALE	G2	Stage II	T2	MX	NX	[Unknown]	NO	[Unknown]
