# Supplementary material for: Development and validation of ferroptosis-related lncRNAs signature for hepatocellular carcinoma
Source: PeerJ. 2021 Jun 11;9:e11627. doi: 10.7717/peerj.11627 (PMC8202323; doi:10.7717/peerj.11627)
Supplement: Supplemental Information 4 [file peerj-09-11627-s004.xlsx]

## Sheet: Sheet1
Gene	conMean	treatMean	logFC	P value	FDR
RPL8	211.681	704.837	1.7354	4.54367e-21	3.21086e-20
CS	5.37879	13.8183	1.36123	1.45074e-22	1.18291e-21
EMC2	4.26184	9.93217	1.22063	4.52047e-24	5.63729e-23
NOX1	0.146418	0.415607	1.50512	9.69614e-15	3.11452e-14
NOX4	0.0216366	0.24261	3.4871	1.94152e-28	2.05801e-26
DUOX1	0.0569322	0.494106	3.1175	5.88354e-20	3.46475e-19
G6PD	1.31171	13.5821	3.37219	6.02671e-25	1.06117e-23
ACSL4	7.32149	46.1219	2.65524	3.57418e-12	8.91443e-12
NRAS	5.76946	11.9025	1.04476	7.64046e-17	3.11496e-16
HRAS	4.52107	13.5674	1.5854	7.5853e-25	1.14863e-23
TFRC	3.67961	10.991	1.5787	1.93422e-16	7.32242e-16
SLC38A1	1.29373	4.37665	1.75829	2.99873e-05	4.35432e-05
SLC1A5	2.72912	8.79615	1.68844	0.00412299	0.00504297
GLS2	4.77871	1.7868	-1.41924	1.24398e-15	4.54696e-15
ALOX12	0.109011	0.275266	1.33635	1.04005e-12	2.75612e-12
ALOX15B	0.142067	1.81789	3.67762	7.72369e-07	1.24047e-06
MAPK3	3.65701	9.50819	1.37851	5.73089e-26	1.73564e-24
CDKN2A	0.162719	4.09759	4.65432	1.87e-25	4.4049e-24
MYB	0.0463979	0.13344	1.52406	7.28782e-08	1.26641e-07
PRKAA2	0.279372	1.62845	2.54324	2.29901e-10	4.87389e-10
BAP1	7.27858	15.1878	1.06118	1.67524e-23	1.6912e-22
ABCC1	0.707154	2.38037	1.75109	3.82189e-06	5.87131e-06
ATF3	20.5744	9.02973	-1.1881	1.06808e-11	2.57311e-11
YY1AP1	3.83637	9.08909	1.24439	1.04477e-23	1.16574e-22
EGLN2	1.59681	3.78929	1.24673	1.96154e-20	1.18813e-19
MIOX	0.0253075	0.730526	4.8513	1.25034e-11	2.97833e-11
TAZ	1.72355	5.52082	1.6795	7.51676e-29	1.59355e-26
DNAJB6	1.46502	3.29309	1.16853	2.67946e-26	1.12313e-24
SLC7A11	0.0301082	0.889909	4.88543	1.65466e-19	8.76969e-19
AKR1C1	27.5296	64.1935	1.22145	0.000384398	0.000512531
AKR1C2	16.2497	50.1002	1.62441	5.01125e-06	7.58847e-06
AKR1C3	17.683	83.414	2.23793	1.18324e-23	1.25423e-22
HSPB1	71.3546	339.067	2.24849	7.64893e-24	9.00873e-23
HSF1	6.46639	17.7451	1.45639	3.17318e-25	6.11558e-24
SQSTM1	29.9868	99.9176	1.73641	9.02019e-17	3.47687e-16
NQO1	1.45967	57.9538	5.31119	6.81872e-16	2.53609e-15
FTH1	139.099	286.486	1.04235	8.92719e-17	3.47687e-16
MT1G	1204.51	315.605	-1.93225	3.78444e-23	3.34292e-22
FANCD2	0.131555	1.01643	2.94977	2.64972e-25	5.6174e-24
HSPA5	110.195	231.575	1.07142	1.03689e-19	5.78474e-19
HELLS	0.0938035	0.861082	3.19844	3.83929e-24	5.08706e-23
FADS2	9.64211	20.0576	1.05673	0.0111863	0.0132486
SRC	1.47643	5.36864	1.86244	2.15681e-10	4.61863e-10
PML	1.50235	3.13655	1.06196	9.28832e-18	4.2807e-17
TP63	0.0324914	0.121942	1.90806	0.00237048	0.00297362
ENPP2	4.15292	9.06023	1.12542	9.15986e-05	0.000128602
NF2	1.55921	3.96433	1.34626	2.04366e-24	2.88838e-23
PLIN2	127.362	62.5749	-1.02528	1.68011e-12	4.39733e-12
AIFM2	3.50635	9.47217	1.43372	4.81735e-21	3.29445e-20
ZFP36	164.714	57.4198	-1.52034	7.99658e-18	3.76728e-17
CAV1	4.22235	8.7237	1.04689	3.25018e-09	6.37999e-09
PTGS2	0.685695	0.20982	-1.70841	5.30649e-17	2.24995e-16
DUSP1	210.261	101.366	-1.05261	6.88476e-14	2.02718e-13
NOS2	0.0972624	0.402505	2.04905	5.20947e-13	1.49244e-12
NCF2	1.94716	4.04533	1.05489	0.0117892	0.0138851
MT3	0.0171549	0.505604	4.88132	0.000988025	0.0012772
ALB	34010.4	14088.9	-1.27141	6.52587e-21	4.32339e-20
TXNRD1	6.76314	28.1066	2.05514	1.93464e-17	8.54467e-17
SRXN1	0.361867	1.48891	2.04073	5.05613e-15	1.70143e-14
GPX2	106.985	267.704	1.32323	0.0100979	0.0121634
DDIT4	14.4734	30.4161	1.07143	6.49238e-05	9.23749e-05
ASNS	0.500574	2.5703	2.36028	2.42608e-09	4.8068e-09
DDIT3	9.15751	26.0193	1.50655	3.17612e-17	1.37416e-16
SLC1A4	1.91272	5.00649	1.38818	6.02663e-15	1.99632e-14
SLC7A5	2.46272	5.03757	1.03248	0.0263492	0.0305247
ZNF419	0.285625	0.643774	1.17243	9.42743e-13	2.52989e-12
ZFP69B	0.135104	0.407536	1.59286	8.38869e-17	3.35548e-16
TUBE1	3.04622	1.32905	-1.19662	8.3329e-21	5.35326e-20
IL6	0.867032	0.320722	-1.43476	3.10172e-05	4.47324e-05
FTL	6020.63	12148.8	1.01283	7.27629e-07	1.17754e-06
MAFG	1.05616	4.15899	1.97741	7.4264e-23	6.29758e-22
HAMP	148.253	15.9674	-3.21486	6.50719e-25	1.06117e-23
STEAP3	47.6772	21.8395	-1.12636	2.10621e-19	1.08906e-18
DRD4	0.155276	1.07583	2.79255	1.0577e-14	3.24975e-14
SLC2A1	0.680047	2.53401	1.89771	3.92036e-05	5.61565e-05
SLC2A6	0.920582	3.11068	1.75661	9.56692e-08	1.64893e-07
SLC2A14	0.0452823	0.17522	1.95215	0.00358376	0.00441719
NNMT	469.383	140.667	-1.73849	1.1498e-17	5.18631e-17
STMN1	1.90256	13.5199	2.82907	1.89929e-27	1.00662e-25
RRM2	0.469399	6.3783	3.76429	3.17866e-26	1.12313e-24
CAPG	3.48688	13.1953	1.92002	1.94929e-11	4.44354e-11
AURKA	0.65543	6.89275	3.39456	4.05978e-28	2.86891e-26
