# Supplementary material for: Development and validation of ferroptosis-related lncRNAs signature for hepatocellular carcinoma
Source: PeerJ. 2021 Jun 11;9:e11627. doi: 10.7717/peerj.11627 (PMC8202323; doi:10.7717/peerj.11627)
Supplement: Supplemental Information 5 [file peerj-09-11627-s005.xlsx]

## Sheet: Sheet1
ONTOLOGY	ID	Description	GeneRatio	BgRatio	P value	p.adjust	qvalue	geneID	Count
BP	GO:0062197	cellular response to chemical stress	24/82	350/18670	1.96191e-22	5.53652e-19	3.75241e-19	NOX1/NOX4/G6PD/MAPK3/MYB/PRKAA2/SLC7A11/AKR1C3/HSPB1/HSF1/NQO1/FANCD2/SRC/PML/CAV1/PTGS2/NCF2/MT3/TXNRD1/SRXN1/GPX2/DDIT3/IL6/SLC2A1	24
BP	GO:0006979	response to oxidative stress	23/82	451/18670	1.31904e-18	1.86116e-15	1.26142e-15	NOX1/NOX4/DUOX1/G6PD/MAPK3/MYB/PRKAA2/SLC7A11/AKR1C3/HSPB1/HSF1/NQO1/FANCD2/SRC/PML/PTGS2/DUSP1/NCF2/MT3/TXNRD1/SRXN1/GPX2/IL6	23
BP	GO:0034599	cellular response to oxidative stress	20/82	302/18670	2.01647e-18	1.89683e-15	1.28559e-15	NOX1/NOX4/G6PD/MAPK3/MYB/PRKAA2/SLC7A11/AKR1C3/HSPB1/HSF1/NQO1/FANCD2/SRC/PML/NCF2/MT3/TXNRD1/SRXN1/GPX2/IL6	20
BP	GO:0031667	response to nutrient levels	18/82	499/18670	4.30828e-12	3.03949e-09	2.06004e-09	G6PD/ACSL4/MAPK3/PRKAA2/ATF3/AKR1C3/HSF1/NQO1/HSPA5/SRC/ZFP36/PTGS2/MT3/ALB/ASNS/DDIT3/HAMP/SLC2A1	18
BP	GO:0072593	reactive oxygen species metabolic process	14/82	284/18670	2.24827e-11	1.26892e-08	8.60022e-09	NOX1/NOX4/DUOX1/G6PD/GLS2/ALOX12/AKR1C3/NQO1/CAV1/PTGS2/NOS2/NCF2/MT3/DDIT4	14
BP	GO:0015711	organic anion transport	16/82	495/18670	3.90841e-10	1.83826e-07	1.24589e-07	ACSL4/SLC38A1/SLC1A5/GLS2/PRKAA2/ABCC1/SLC7A11/AKR1C1/PLIN2/NOS2/SLC1A4/SLC7A5/DRD4/SLC2A1/SLC2A6/SLC2A14	16
BP	GO:0042594	response to starvation	11/82	191/18670	7.16328e-10	2.83658e-07	1.92252e-07	MAPK3/PRKAA2/ATF3/AKR1C3/HSPA5/ZFP36/ALB/ASNS/DDIT3/HAMP/SLC2A1	11
BP	GO:0097237	cellular response to toxic substance	12/82	247/18670	8.04134e-10	2.83658e-07	1.92252e-07	DUOX1/MYB/HSF1/NQO1/SRC/PTGS2/MT3/ALB/TXNRD1/SRXN1/GPX2/IL6	12
BP	GO:0006801	superoxide metabolic process	8/82	73/18670	1.04173e-09	3.26641e-07	2.21383e-07	NOX1/NOX4/DUOX1/ALOX12/NQO1/NOS2/NCF2/MT3	8
BP	GO:0046942	carboxylic acid transport	13/82	331/18670	2.00915e-09	5.54372e-07	3.7573e-07	ACSL4/SLC38A1/SLC1A5/GLS2/PRKAA2/ABCC1/SLC7A11/AKR1C1/PLIN2/NOS2/SLC1A4/SLC7A5/DRD4	13
BP	GO:0015849	organic acid transport	13/82	333/18670	2.16091e-09	5.54372e-07	3.7573e-07	ACSL4/SLC38A1/SLC1A5/GLS2/PRKAA2/ABCC1/SLC7A11/AKR1C1/PLIN2/NOS2/SLC1A4/SLC7A5/DRD4	13
BP	GO:0048871	multicellular organismal homeostasis	15/82	486/18670	2.77192e-09	6.51863e-07	4.41805e-07	NOX4/TFRC/ALOX12/PRKAA2/HSPB1/HSF1/SRC/TP63/CAV1/PTGS2/ALB/DDIT3/IL6/HAMP/STMN1	15
BP	GO:0035690	cellular response to drug	14/82	433/18670	5.52465e-09	1.18871e-06	8.05659e-07	TFRC/MAPK3/MYB/PRKAA2/HSF1/NQO1/HSPA5/SRC/PTGS2/NOS2/MT3/DDIT4/IL6/DRD4	14
BP	GO:0010038	response to metal ion	13/82	362/18670	5.89723e-09	1.18871e-06	8.05659e-07	G6PD/MAPK3/PRKAA2/AKR1C3/HSF1/NQO1/MT1G/HSPA5/CAV1/PTGS2/DUSP1/MT3/HAMP	13
BP	GO:0098754	detoxification	9/82	137/18670	8.81457e-09	1.65831e-06	1.12394e-06	DUOX1/NQO1/MT1G/PTGS2/MT3/ALB/TXNRD1/SRXN1/GPX2	9
BP	GO:0098869	cellular oxidant detoxification	8/82	102/18670	1.53404e-08	2.68176e-06	1.81758e-06	DUOX1/NQO1/PTGS2/MT3/ALB/TXNRD1/SRXN1/GPX2	8
BP	GO:0070482	response to oxygen levels	13/82	394/18670	1.61552e-08	2.68176e-06	1.81758e-06	NOX1/NOX4/MYB/EGLN2/HSF1/SRC/PML/CAV1/PTGS2/NOS2/MT3/DDIT4/SLC2A1	13
BP	GO:0001101	response to acid chemical	12/82	343/18670	3.19229e-08	4.76887e-06	3.23214e-06	MYB/PRKAA2/AKR1C1/AKR1C2/AKR1C3/HSF1/NQO1/SRC/PTGS2/DUSP1/ASNS/HAMP	12
BP	GO:1990748	cellular detoxification	8/82	112/18670	3.21079e-08	4.76887e-06	3.23214e-06	DUOX1/NQO1/PTGS2/MT3/ALB/TXNRD1/SRXN1/GPX2	8
BP	GO:0070997	neuron death	12/82	348/18670	3.7424e-08	5.28053e-06	3.57892e-06	G6PD/HRAS/MYB/EGLN2/SLC7A11/HSF1/NQO1/HSPA5/TP63/MT3/DDIT4/DDIT3	12
BP	GO:0001666	response to hypoxia	12/82	359/18670	5.26242e-08	7.0717e-06	4.7929e-06	NOX4/MYB/EGLN2/HSF1/SRC/PML/CAV1/PTGS2/NOS2/MT3/DDIT4/SLC2A1	12
BP	GO:0036293	response to decreased oxygen levels	12/82	370/18670	7.31419e-08	9.17144e-06	6.21601e-06	NOX4/MYB/EGLN2/HSF1/SRC/PML/CAV1/PTGS2/NOS2/MT3/DDIT4/SLC2A1	12
BP	GO:0051186	cofactor metabolic process	13/82	449/18670	7.47495e-08	9.17144e-06	6.21601e-06	NOX1/DUOX1/G6PD/ACSL4/ABCC1/SLC7A11/AKR1C1/AKR1C2/AKR1C3/PTGS2/MT3/SLC2A1/NNMT	13
BP	GO:0031669	cellular response to nutrient levels	10/82	237/18670	8.64231e-08	1.01619e-05	6.88731e-06	MAPK3/PRKAA2/ATF3/AKR1C3/HSF1/HSPA5/PTGS2/ALB/ASNS/SLC2A1	10
BP	GO:0071248	cellular response to metal ion	9/82	188/18670	1.36772e-07	1.54388e-05	1.04638e-05	MAPK3/PRKAA2/AKR1C3/HSF1/NQO1/MT1G/HSPA5/PTGS2/MT3	9
BP	GO:0010332	response to gamma radiation	6/82	56/18670	1.62432e-07	1.76302e-05	1.1949e-05	NOX4/HRAS/HSF1/FANCD2/HSPA5/PML	6
BP	GO:0031668	cellular response to extracellular stimulus	10/82	268/18670	2.70876e-07	2.83116e-05	1.91884e-05	MAPK3/PRKAA2/ATF3/AKR1C3/HSF1/HSPA5/PTGS2/ALB/ASNS/SLC2A1	10
BP	GO:0009267	cellular response to starvation	8/82	149/18670	2.94897e-07	2.97214e-05	2.01439e-05	MAPK3/PRKAA2/ATF3/AKR1C3/HSPA5/ALB/ASNS/SLC2A1	8
BP	GO:0036003	positive regulation of transcription from RNA polymerase II promoter in response to stress	5/82	33/18670	3.11271e-07	3.02899e-05	2.05292e-05	ATF3/HSF1/HSPA5/MT3/DDIT3	5
BP	GO:0071241	cellular response to inorganic substance	9/82	215/18670	4.26413e-07	4.01113e-05	2.71857e-05	MAPK3/PRKAA2/AKR1C3/HSF1/NQO1/MT1G/HSPA5/PTGS2/MT3	9
BP	GO:0042554	superoxide anion generation	5/82	36/18670	4.89359e-07	4.45151e-05	3.01704e-05	NOX1/NOX4/DUOX1/ALOX12/NCF2	5
BP	GO:0001676	long-chain fatty acid metabolic process	7/82	109/18670	5.04778e-07	4.45151e-05	3.01704e-05	ACSL4/ALOX12/ALOX15B/MAPK3/AKR1C3/FADS2/PTGS2	7
BP	GO:0033559	unsaturated fatty acid metabolic process	7/82	110/18670	5.37189e-07	4.49476e-05	3.04636e-05	ALOX12/ALOX15B/MAPK3/AKR1C2/AKR1C3/FADS2/PTGS2	7
BP	GO:0097193	intrinsic apoptotic signaling pathway	10/82	289/18670	5.41537e-07	4.49476e-05	3.04636e-05	NOX1/HRAS/HSPB1/SRC/PML/TP63/CAV1/PTGS2/DDIT4/DDIT3	10
BP	GO:0071276	cellular response to cadmium ion	5/82	37/18670	5.63879e-07	4.54648e-05	3.08141e-05	MAPK3/AKR1C3/HSF1/MT1G/MT3	5
BP	GO:0006690	icosanoid metabolic process	7/82	114/18670	6.849e-07	5.36717e-05	3.63764e-05	ALOX12/ALOX15B/MAPK3/ABCC1/AKR1C2/AKR1C3/PTGS2	7
BP	GO:1901568	fatty acid derivative metabolic process	8/82	167/18670	7.03704e-07	5.36717e-05	3.63764e-05	ACSL4/ALOX12/ALOX15B/MAPK3/ABCC1/AKR1C2/AKR1C3/PTGS2	8
BP	GO:0034614	cellular response to reactive oxygen species	8/82	168/18670	7.36284e-07	5.46788e-05	3.70589e-05	MAPK3/MYB/AKR1C3/HSF1/NQO1/SRC/MT3/IL6	8
BP	GO:0000302	response to reactive oxygen species	9/82	232/18670	8.0658e-07	5.83633e-05	3.95561e-05	MAPK3/MYB/AKR1C3/HSF1/NQO1/SRC/DUSP1/MT3/IL6	9
BP	GO:0071216	cellular response to biotic stimulus	9/82	236/18670	9.30022e-07	6.5613e-05	4.44697e-05	MAPK3/HSF1/HSPA5/SRC/ZFP36/NOS2/DDIT3/IL6/HAMP	9
BP	GO:0051402	neuron apoptotic process	9/82	239/18670	1.03303e-06	7.11026e-05	4.81903e-05	G6PD/HRAS/MYB/EGLN2/NQO1/HSPA5/TP63/MT3/DDIT3	9
BP	GO:0016999	antibiotic metabolic process	7/82	122/18670	1.08402e-06	7.28355e-05	4.93648e-05	CS/NOX1/DUOX1/AKR1C1/AKR1C2/AKR1C3/MT3	7
BP	GO:1901214	regulation of neuron death	10/82	313/18670	1.11836e-06	7.33959e-05	4.97446e-05	G6PD/HRAS/MYB/EGLN2/SLC7A11/HSF1/NQO1/MT3/DDIT4/DDIT3	10
BP	GO:0007568	aging	10/82	321/18670	1.40445e-06	9.00764e-05	6.10499e-05	NOX4/HRAS/ALOX12/MAPK3/CDKN2A/NQO1/PML/TP63/PTGS2/HAMP	10
BP	GO:0046677	response to antibiotic	10/82	327/18670	1.65908e-06	0.000104043	7.05159e-05	G6PD/MYB/HSF1/NQO1/HSPA5/SRC/DUSP1/IL6/HAMP/DRD4	10
BP	GO:0055076	transition metal ion homeostasis	7/82	133/18670	1.93675e-06	0.000117327	7.95193e-05	TFRC/FTH1/MT1G/MT3/FTL/HAMP/STEAP3	7
BP	GO:0036499	PERK-mediated unfolded protein response	4/82	21/18670	1.95406e-06	0.000117327	7.95193e-05	ATF3/HSPA5/ASNS/DDIT3	4
BP	GO:1901654	response to ketone	8/82	193/18670	2.09089e-06	0.000122927	8.33146e-05	PRKAA2/AKR1C2/AKR1C3/HSF1/SRC/CAV1/DUSP1/DDIT4	8
BP	GO:0071496	cellular response to external stimulus	10/82	339/18670	2.29157e-06	0.000131976	8.94476e-05	MAPK3/PRKAA2/ATF3/AKR1C3/HSF1/HSPA5/PTGS2/ALB/ASNS/SLC2A1	10
BP	GO:0062012	regulation of small molecule metabolic process	11/82	429/18670	2.68187e-06	0.000151365	0.000102589	PRKAA2/TAZ/SLC7A11/AKR1C3/NQO1/SRC/CAV1/PTGS2/NOS2/DDIT4/SLC2A6	11
BP	GO:0019369	arachidonic acid metabolic process	5/82	51/18670	2.89602e-06	0.000160247	0.000108608	ALOX12/ALOX15B/MAPK3/AKR1C3/PTGS2	5
BP	GO:0010212	response to ionizing radiation	7/82	147/18670	3.77303e-06	0.000201248	0.000136398	NOX4/HRAS/HSF1/FANCD2/HSPA5/PML/HAMP	7
BP	GO:0071229	cellular response to acid chemical	8/82	209/18670	3.77965e-06	0.000201248	0.000136398	MYB/PRKAA2/AKR1C1/AKR1C2/AKR1C3/HSF1/SRC/HAMP	8
BP	GO:0006636	unsaturated fatty acid biosynthetic process	5/82	54/18670	3.85891e-06	0.000201664	0.000136679	ALOX12/ALOX15B/AKR1C3/FADS2/PTGS2	5
BP	GO:0009314	response to radiation	11/82	448/18670	4.06223e-06	0.00020843	0.000141265	NOX4/HRAS/SLC7A11/HSF1/FANCD2/HSPA5/PML/PTGS2/DUSP1/ASNS/HAMP	11
BP	GO:0043281	regulation of cysteine-type endopeptidase activity involved in apoptotic process	8/82	215/18670	4.65854e-06	0.000234757	0.000159108	ALOX12/DNAJB6/HSF1/SRC/PML/TP63/PTGS2/MT3	8
BP	GO:1990776	response to angiotensin	4/82	28/18670	6.53038e-06	0.000322878	0.000218833	HSF1/SRC/CAV1/PTGS2	4
BP	GO:0006631	fatty acid metabolic process	10/82	383/18670	6.75046e-06	0.000322878	0.000218833	ACSL4/ALOX12/ALOX15B/MAPK3/PRKAA2/AKR1C2/AKR1C3/FADS2/CAV1/PTGS2	10
BP	GO:0048545	response to steroid hormone	10/82	383/18670	6.75046e-06	0.000322878	0.000218833	EGLN2/AKR1C3/SRC/TP63/ZFP36/CAV1/PTGS2/DUSP1/DDIT4/IL6	10
BP	GO:0031960	response to corticosteroid	7/82	162/18670	7.16272e-06	0.000336886	0.000228327	AKR1C3/SRC/ZFP36/PTGS2/DUSP1/DDIT4/IL6	7
BP	GO:0046686	response to cadmium ion	5/82	63/18670	8.31564e-06	0.000384701	0.000260734	MAPK3/AKR1C3/HSF1/MT1G/MT3	5
BP	GO:0071480	cellular response to gamma radiation	4/82	30/18670	8.68246e-06	0.000395192	0.000267844	NOX4/HRAS/HSF1/HSPA5	4
BP	GO:0046916	cellular transition metal ion homeostasis	6/82	110/18670	8.8753e-06	0.000397557	0.000269447	TFRC/FTH1/MT1G/MT3/FTL/HAMP	6
BP	GO:0030647	aminoglycoside antibiotic metabolic process	3/82	10/18670	9.58401e-06	0.000422595	0.000286417	AKR1C1/AKR1C2/AKR1C3	3
BP	GO:0051235	maintenance of location	9/82	315/18670	9.83414e-06	0.000426953	0.000289371	FTH1/HSPA5/PML/PLIN2/CAV1/ALB/DDIT3/IL6/FTL	9
BP	GO:2000116	regulation of cysteine-type endopeptidase activity	8/82	239/18670	1.01141e-05	0.000432455	0.0002931	ALOX12/DNAJB6/HSF1/SRC/PML/TP63/PTGS2/MT3	8
BP	GO:0015807	L-amino acid transport	5/82	67/18670	1.12699e-05	0.000474682	0.000321719	SLC38A1/SLC1A5/SLC7A11/SLC1A4/SLC7A5	5
BP	GO:0042180	cellular ketone metabolic process	8/82	246/18670	1.2473e-05	0.000517629	0.000350827	PRKAA2/SLC7A11/AKR1C1/AKR1C2/AKR1C3/NQO1/CAV1/PTGS2	8
BP	GO:0072584	caveolin-mediated endocytosis	3/82	11/18670	1.31362e-05	0.000529578	0.000358925	MAPK3/SRC/CAV1	3
BP	GO:1990440	positive regulation of transcription from RNA polymerase II promoter in response to endoplasmic reticulum stress	3/82	11/18670	1.31362e-05	0.000529578	0.000358925	ATF3/HSPA5/DDIT3	3
BP	GO:0010876	lipid localization	10/82	415/18670	1.35734e-05	0.000539494	0.000365646	ACSL4/MYB/PRKAA2/ABCC1/AKR1C1/PLIN2/CAV1/NOS2/IL6/DRD4	10
BP	GO:0071214	cellular response to abiotic stimulus	9/82	331/18670	1.45969e-05	0.000564278	0.000382444	NOX1/NOX4/HRAS/MAPK3/HSF1/HSPA5/PTGS2/HAMP/SLC2A1	9
BP	GO:0104004	cellular response to environmental stimulus	9/82	331/18670	1.45969e-05	0.000564278	0.000382444	NOX1/NOX4/HRAS/MAPK3/HSF1/HSPA5/PTGS2/HAMP/SLC2A1	9
BP	GO:0071479	cellular response to ionizing radiation	5/82	71/18670	1.49863e-05	0.000571506	0.000387343	NOX4/HRAS/HSF1/HSPA5/HAMP	5
BP	GO:0043618	regulation of transcription from RNA polymerase II promoter in response to stress	6/82	121/18670	1.53268e-05	0.000576696	0.00039086	ATF3/EGLN2/HSF1/HSPA5/MT3/DDIT3	6
BP	GO:1903409	reactive oxygen species biosynthetic process	6/82	122/18670	1.60635e-05	0.000596463	0.000404257	NOX4/DUOX1/NQO1/CAV1/PTGS2/NOS2	6
BP	GO:0022900	electron transport chain	7/82	186/18670	1.76146e-05	0.00063758	0.000432125	NOX4/TAZ/NQO1/AIFM2/NCF2/TXNRD1/GPX2	7
BP	GO:0000041	transition metal ion transport	6/82	124/18670	1.76227e-05	0.00063758	0.000432125	TFRC/FTH1/MT3/FTL/HAMP/STEAP3	6
BP	GO:0043620	regulation of DNA-templated transcription in response to stress	6/82	127/18670	2.01885e-05	0.000719386	0.000487569	ATF3/EGLN2/HSF1/HSPA5/MT3/DDIT3	6
BP	GO:0051054	positive regulation of DNA metabolic process	7/82	191/18670	2.09025e-05	0.000719386	0.000487569	NOX4/TFRC/MAPK3/HSF1/SRC/PML/IL6	7
BP	GO:0006826	iron ion transport	5/82	76/18670	2.09035e-05	0.000719386	0.000487569	TFRC/FTH1/FTL/HAMP/STEAP3	5
BP	GO:0045454	cell redox homeostasis	5/82	76/18670	2.09035e-05	0.000719386	0.000487569	EGLN2/NOS2/NCF2/TXNRD1/DDIT3	5
BP	GO:0015804	neutral amino acid transport	4/82	38/18670	2.27697e-05	0.000774169	0.000524699	SLC38A1/SLC1A5/SLC1A4/SLC7A5	4
BP	GO:0051180	vitamin transport	4/82	39/18670	2.52874e-05	0.000849535	0.000575779	ABCC1/SLC2A1/SLC2A6/SLC2A14	4
BP	GO:0046683	response to organophosphorus	6/82	134/18670	2.73576e-05	0.000904642	0.000613128	NOX4/DUOX1/AKR1C1/HSPA5/PTGS2/DUSP1	6
BP	GO:0052547	regulation of peptidase activity	10/82	452/18670	2.82271e-05	0.000904642	0.000613128	ALOX12/MAPK3/DNAJB6/HSF1/SRC/PML/TP63/CAV1/PTGS2/MT3	10
BP	GO:0055072	iron ion homeostasis	5/82	81/18670	2.84969e-05	0.000904642	0.000613128	TFRC/FTH1/FTL/HAMP/STEAP3	5
BP	GO:1903825	organic acid transmembrane transport	6/82	135/18670	2.85305e-05	0.000904642	0.000613128	SLC38A1/SLC1A5/PRKAA2/SLC7A11/SLC1A4/SLC7A5	6
BP	GO:1905039	carboxylic acid transmembrane transport	6/82	135/18670	2.85305e-05	0.000904642	0.000613128	SLC38A1/SLC1A5/PRKAA2/SLC7A11/SLC1A4/SLC7A5	6
BP	GO:0003333	amino acid transmembrane transport	5/82	82/18670	3.02434e-05	0.000948299	0.000642717	SLC38A1/SLC1A5/SLC7A11/SLC1A4/SLC7A5	5
BP	GO:0071222	cellular response to lipopolysaccharide	7/82	205/18670	3.29012e-05	0.0010203	0.000691515	MAPK3/HSF1/SRC/ZFP36/NOS2/IL6/HAMP	7
BP	GO:0042149	cellular response to glucose starvation	4/82	42/18670	3.40692e-05	0.00104503	0.00070828	PRKAA2/HSPA5/ASNS/SLC2A1	4
BP	GO:0001819	positive regulation of cytokine production	10/82	464/18670	3.52499e-05	0.00106963	0.000724947	NOX1/HRAS/ALOX15B/MAPK3/MYB/HSPB1/SRC/PTGS2/DDIT3/IL6	10
BP	GO:0006865	amino acid transport	6/82	141/18670	3.64466e-05	0.00109417	0.000741584	SLC38A1/SLC1A5/GLS2/SLC7A11/SLC1A4/SLC7A5	6
BP	GO:0070542	response to fatty acid	5/82	86/18670	3.80761e-05	0.00112774	0.000764333	PRKAA2/AKR1C2/AKR1C3/SRC/PTGS2	5
BP	GO:0043523	regulation of neuron apoptotic process	7/82	210/18670	3.83639e-05	0.00112774	0.000764333	G6PD/HRAS/MYB/EGLN2/NQO1/MT3/DDIT3	7
BP	GO:0071219	cellular response to molecule of bacterial origin	7/82	212/18670	4.07479e-05	0.00118547	0.000803462	MAPK3/HSF1/SRC/ZFP36/NOS2/IL6/HAMP	7
BP	GO:0006869	lipid transport	9/82	380/18670	4.31295e-05	0.00123811	0.000839136	ACSL4/MYB/PRKAA2/ABCC1/AKR1C1/PLIN2/CAV1/NOS2/DRD4	9
BP	GO:0019372	lipoxygenase pathway	3/82	16/18670	4.38817e-05	0.00123811	0.000839136	ALOX12/ALOX15B/PTGS2	3
BP	GO:0042448	progesterone metabolic process	3/82	16/18670	4.38817e-05	0.00123811	0.000839136	AKR1C1/AKR1C2/AKR1C3	3
BP	GO:0042542	response to hydrogen peroxide	6/82	146/18670	4.43121e-05	0.00123811	0.000839136	MYB/HSF1/NQO1/SRC/DUSP1/IL6	6
BP	GO:0071236	cellular response to antibiotic	6/82	147/18670	4.60372e-05	0.0012737	0.000863257	MYB/HSF1/NQO1/HSPA5/SRC/IL6	6
BP	GO:0043393	regulation of protein binding	7/82	217/18670	4.7245e-05	0.00129442	0.000877305	MAPK3/HSF1/HSPA5/SRC/CAV1/STMN1/AURKA	7
BP	GO:0006984	ER-nucleus signaling pathway	4/82	46/18670	4.90118e-05	0.00132992	0.000901361	ATF3/HSPA5/ASNS/DDIT3	4
BP	GO:0051651	maintenance of location in cell	7/82	219/18670	5.00711e-05	0.00133899	0.00090751	FTH1/HSPA5/PML/CAV1/ALB/DDIT3/FTL	7
BP	GO:0018105	peptidyl-serine phosphorylation	8/82	299/18670	5.02951e-05	0.00133899	0.00090751	MAPK3/PRKAA2/SRC/CAV1/PTGS2/DDIT4/IL6/AURKA	8
BP	GO:0043651	linoleic acid metabolic process	3/82	17/18670	5.31162e-05	0.00138791	0.000940663	ALOX12/ALOX15B/FADS2	3
BP	GO:0097501	stress response to metal ion	3/82	17/18670	5.31162e-05	0.00138791	0.000940663	MT1G/HSPA5/MT3	3
BP	GO:1901655	cellular response to ketone	5/82	93/18670	5.5474e-05	0.00143622	0.000973407	PRKAA2/AKR1C2/AKR1C3/SRC/DDIT4	5
BP	GO:0030168	platelet activation	6/82	153/18670	5.75525e-05	0.00147648	0.0010007	ALOX12/MAPK3/SLC7A11/HSPB1/SRC/IL6	6
BP	GO:0001894	tissue homeostasis	7/82	229/18670	6.63633e-05	0.00168718	0.0011435	NOX4/TFRC/HSPB1/SRC/PTGS2/ALB/IL6	7
BP	GO:0015908	fatty acid transport	5/82	97/18670	6.78532e-05	0.00170966	0.00115873	ACSL4/PRKAA2/PLIN2/NOS2/DRD4	5
BP	GO:2001233	regulation of apoptotic signaling pathway	9/82	406/18670	7.18099e-05	0.00179334	0.00121545	NOX1/ATF3/HSPB1/SRC/PML/TP63/CAV1/PTGS2/DDIT3	9
BP	GO:0097305	response to alcohol	7/82	233/18670	7.3989e-05	0.00182973	0.00124011	G6PD/PRKAA2/AKR1C2/AKR1C3/NQO1/HAMP/DRD4	7
BP	GO:0070301	cellular response to hydrogen peroxide	5/82	99/18670	7.47903e-05	0.00182973	0.00124011	MYB/HSF1/NQO1/SRC/IL6	5
BP	GO:1902644	tertiary alcohol metabolic process	3/82	19/18670	7.5212e-05	0.00182973	0.00124011	AKR1C1/AKR1C2/AKR1C3	3
BP	GO:0015718	monocarboxylic acid transport	6/82	163/18670	8.17716e-05	0.00193581	0.00131201	ACSL4/PRKAA2/AKR1C1/PLIN2/NOS2/DRD4	6
BP	GO:0048661	positive regulation of smooth muscle cell proliferation	5/82	101/18670	8.22615e-05	0.00193581	0.00131201	NOX1/ALOX12/MYB/PTGS2/IL6	5
BP	GO:0007050	cell cycle arrest	7/82	237/18670	8.23166e-05	0.00193581	0.00131201	HRAS/CDKN2A/PRKAA2/PML/DUSP1/DDIT3/AURKA	7
BP	GO:0072330	monocarboxylic acid biosynthetic process	7/82	237/18670	8.23166e-05	0.00193581	0.00131201	ALOX12/ALOX15B/PRKAA2/AKR1C3/FADS2/PTGS2/ASNS	7
BP	GO:0018209	peptidyl-serine modification	8/82	322/18670	8.44695e-05	0.00195648	0.00132602	MAPK3/PRKAA2/SRC/CAV1/PTGS2/DDIT4/IL6/AURKA	8
BP	GO:0006633	fatty acid biosynthetic process	6/82	164/18670	8.4582e-05	0.00195648	0.00132602	ALOX12/ALOX15B/PRKAA2/AKR1C3/FADS2/PTGS2	6
BP	GO:1902475	L-alpha-amino acid transmembrane transport	4/82	53/18670	8.59199e-05	0.00197127	0.00133604	SLC38A1/SLC1A5/SLC7A11/SLC7A5	4
BP	GO:2001242	regulation of intrinsic apoptotic signaling pathway	6/82	165/18670	8.7469e-05	0.00199062	0.00134916	NOX1/HSPB1/SRC/CAV1/PTGS2/DDIT3	6
BP	GO:0016137	glycoside metabolic process	3/82	20/18670	8.82046e-05	0.00199131	0.00134962	AKR1C1/AKR1C2/AKR1C3	3
BP	GO:0032091	negative regulation of protein binding	5/82	103/18670	9.02946e-05	0.00202231	0.00137064	MAPK3/HSPA5/CAV1/STMN1/AURKA	5
BP	GO:0051100	negative regulation of binding	6/82	169/18670	9.9812e-05	0.0022079	0.00149642	MAPK3/HSPA5/CAV1/DDIT3/STMN1/AURKA	6
BP	GO:0032496	response to lipopolysaccharide	8/82	330/18670	0.000100146	0.0022079	0.00149642	MAPK3/HSF1/SRC/ZFP36/PTGS2/NOS2/IL6/HAMP	8
BP	GO:0048608	reproductive structure development	9/82	431/18670	0.000113135	0.00246219	0.00166877	ALOX15B/MAPK3/DNAJB6/AKR1C3/HSF1/HSPA5/SRC/TP63/PTGS2	9
BP	GO:0007596	blood coagulation	8/82	336/18670	0.000113425	0.00246219	0.00166877	ALOX12/MAPK3/SLC7A11/HSPB1/SRC/CAV1/IL6/MAFG	8
BP	GO:0071398	cellular response to fatty acid	4/82	57/18670	0.000114368	0.00246372	0.0016698	PRKAA2/AKR1C2/AKR1C3/SRC	4
BP	GO:0006925	inflammatory cell apoptotic process	3/82	22/18670	0.000118401	0.00249217	0.00168909	CDKN2A/SLC7A11/IL6	3
BP	GO:0071379	cellular response to prostaglandin stimulus	3/82	22/18670	0.000118401	0.00249217	0.00168909	PRKAA2/AKR1C2/AKR1C3	3
BP	GO:0048732	gland development	9/82	434/18670	0.000119222	0.00249217	0.00168909	ALOX15B/MAPK3/SRC/PML/TP63/CAV1/ASNS/HAMP/AURKA	9
BP	GO:0061458	reproductive system development	9/82	434/18670	0.000119222	0.00249217	0.00168909	ALOX15B/MAPK3/DNAJB6/AKR1C3/HSF1/HSPA5/SRC/TP63/PTGS2	9
BP	GO:0006986	response to unfolded protein	6/82	176/18670	0.000124719	0.00258667	0.00175314	ATF3/HSPB1/HSF1/HSPA5/ASNS/DDIT3	6
BP	GO:0007599	hemostasis	8/82	341/18670	0.000125575	0.00258667	0.00175314	ALOX12/MAPK3/SLC7A11/HSPB1/SRC/CAV1/IL6/MAFG	8
BP	GO:0050817	coagulation	8/82	342/18670	0.00012813	0.00262017	0.00177584	ALOX12/MAPK3/SLC7A11/HSPB1/SRC/CAV1/IL6/MAFG	8
BP	GO:0060249	anatomical structure homeostasis	9/82	439/18670	0.000129975	0.0026351	0.00178596	NOX4/TFRC/MAPK3/HSPB1/SRC/PML/PTGS2/ALB/IL6	9
BP	GO:0002237	response to molecule of bacterial origin	8/82	343/18670	0.000130728	0.0026351	0.00178596	MAPK3/HSF1/SRC/ZFP36/PTGS2/NOS2/IL6/HAMP	8
BP	GO:0050730	regulation of peptidyl-tyrosine phosphorylation	7/82	256/18670	0.000133005	0.00266198	0.00180418	NOX4/HSF1/SRC/ENPP2/NF2/CAV1/IL6	7
BP	GO:0061436	establishment of skin barrier	3/82	23/18670	0.00013573	0.00267853	0.00181539	ALOX12/TP63/STMN1	3
BP	GO:0072337	modified amino acid transport	3/82	23/18670	0.00013573	0.00267853	0.00181539	ABCC1/SLC7A11/SLC1A4	3
BP	GO:2001235	positive regulation of apoptotic signaling pathway	6/82	179/18670	0.000136797	0.00268084	0.00181696	NOX1/ATF3/PML/TP63/CAV1/DDIT3	6
BP	GO:0010565	regulation of cellular ketone metabolic process	6/82	180/18670	0.000141023	0.00274459	0.00186017	PRKAA2/SLC7A11/AKR1C3/NQO1/CAV1/PTGS2	6
BP	GO:0045604	regulation of epidermal cell differentiation	4/82	61/18670	0.000149094	0.00288181	0.00195317	ALOX15B/TP63/ZFP36/MAFG	4
BP	GO:1900542	regulation of purine nucleotide metabolic process	5/82	115/18670	0.000151932	0.00291668	0.0019768	PRKAA2/TAZ/NOS2/DDIT4/SLC2A6	5
BP	GO:0051052	regulation of DNA metabolic process	8/82	351/18670	0.00015312	0.00291963	0.0019788	NOX4/TFRC/MAPK3/HSF1/SRC/PML/DUSP1/IL6	8
BP	GO:0007569	cell aging	5/82	116/18670	0.000158233	0.00298844	0.00202544	NOX4/HRAS/CDKN2A/PML/TP63	5
BP	GO:0045453	bone resorption	4/82	62/18670	0.000158847	0.00298844	0.00202544	NOX4/TFRC/SRC/IL6	4
BP	GO:0006140	regulation of nucleotide metabolic process	5/82	117/18670	0.000164733	0.00307173	0.00208189	PRKAA2/TAZ/NOS2/DDIT4/SLC2A6	5
BP	GO:0046394	carboxylic acid biosynthetic process	8/82	355/18670	0.000165451	0.00307173	0.00208189	GLS2/ALOX12/ALOX15B/PRKAA2/AKR1C3/FADS2/PTGS2/ASNS	8
BP	GO:0016053	organic acid biosynthetic process	8/82	356/18670	0.000168658	0.00309783	0.00209958	GLS2/ALOX12/ALOX15B/PRKAA2/AKR1C3/FADS2/PTGS2/ASNS	8
BP	GO:0006879	cellular iron ion homeostasis	4/82	63/18670	0.000169053	0.00309783	0.00209958	TFRC/FTH1/FTL/HAMP	4
BP	GO:1904385	cellular response to angiotensin	3/82	25/18670	0.000175159	0.00318903	0.00216139	HSF1/SRC/CAV1	3
BP	GO:0018108	peptidyl-tyrosine phosphorylation	8/82	363/18670	0.000192577	0.00348366	0.00236108	NOX4/MAPK3/HSF1/SRC/ENPP2/NF2/CAV1/IL6	8
BP	GO:0071478	cellular response to radiation	6/82	191/18670	0.000194703	0.0034997	0.00237195	NOX4/HRAS/HSF1/HSPA5/PTGS2/HAMP	6
BP	GO:0033561	regulation of water loss via skin	3/82	26/18670	0.00019738	0.00352536	0.00238934	ALOX12/TP63/STMN1	3
BP	GO:0019748	secondary metabolic process	4/82	66/18670	0.000202511	0.00359185	0.0024344	SLC7A11/AKR1C1/AKR1C2/AKR1C3	4
BP	GO:0018212	peptidyl-tyrosine modification	8/82	366/18670	0.000203648	0.00359185	0.0024344	NOX4/MAPK3/HSF1/SRC/ENPP2/NF2/CAV1/IL6	8
BP	GO:2000377	regulation of reactive oxygen species metabolic process	6/82	195/18670	0.000217799	0.00381757	0.00258739	NOX4/G6PD/AKR1C3/CAV1/PTGS2/MT3	6
BP	GO:0071280	cellular response to copper ion	3/82	27/18670	0.000221351	0.00385587	0.00261335	HSF1/MT1G/MT3	3
BP	GO:0051098	regulation of binding	8/82	373/18670	0.000231532	0.00400848	0.00271678	MAPK3/HSF1/HSPA5/SRC/CAV1/DDIT3/STMN1/AURKA	8
BP	GO:0035966	response to topologically incorrect protein	6/82	199/18670	0.000243005	0.00418146	0.00283402	ATF3/HSPB1/HSF1/HSPA5/ASNS/DDIT3	6
BP	GO:0051348	negative regulation of transferase activity	7/82	285/18670	0.000256798	0.00439203	0.00297673	CDKN2A/HSPB1/SRC/NF2/ZFP36/CAV1/DUSP1	7
BP	GO:0010575	positive regulation of vascular endothelial growth factor production	3/82	29/18670	0.000274773	0.00467114	0.0031659	NOX1/PTGS2/IL6	3
BP	GO:0098656	anion transmembrane transport	7/82	291/18670	0.00029138	0.00492379	0.00333714	SLC38A1/SLC1A5/PRKAA2/ABCC1/SLC7A11/SLC1A4/SLC7A5	7
BP	GO:0042759	long-chain fatty acid biosynthetic process	3/82	30/18670	0.000304338	0.00511216	0.00346481	ALOX12/ALOX15B/PTGS2	3
BP	GO:0009064	glutamine family amino acid metabolic process	4/82	74/18670	0.000314817	0.00525689	0.0035629	GLS2/SLC7A11/NOS2/ASNS	4
BP	GO:0034694	response to prostaglandin	3/82	31/18670	0.000335882	0.00557563	0.00377893	PRKAA2/AKR1C2/AKR1C3	3
BP	GO:0034605	cellular response to heat	5/82	137/18670	0.000343008	0.00566064	0.00383654	MAPK3/DNAJB6/HSF1/HSPA5/PTGS2	5
BP	GO:0006855	drug transmembrane transport	4/82	76/18670	0.000348702	0.00571235	0.00387159	SLC1A5/ABCC1/SLC7A11/SLC7A5	4
BP	GO:0070372	regulation of ERK1 and ERK2 cascade	7/82	300/18670	0.00035019	0.00571235	0.00387159	NOX4/HRAS/MAPK3/ATF3/SRC/DUSP1/MT3	7
BP	GO:0006809	nitric oxide biosynthetic process	4/82	77/18670	0.000366588	0.00594547	0.00402959	NQO1/CAV1/PTGS2/NOS2	4
BP	GO:1901661	quinone metabolic process	3/82	32/18670	0.000369457	0.00595776	0.00403792	AKR1C1/AKR1C2/AKR1C3	3
BP	GO:0034620	cellular response to unfolded protein	5/82	140/18670	0.000378952	0.00607615	0.00411816	ATF3/HSF1/HSPA5/ASNS/DDIT3	5
BP	GO:0062013	positive regulation of small molecule metabolic process	5/82	141/18670	0.000391544	0.00624259	0.00423096	PRKAA2/TAZ/SRC/PTGS2/NOS2	5
BP	GO:0033028	myeloid cell apoptotic process	3/82	33/18670	0.000405119	0.00639352	0.00433326	CDKN2A/SLC7A11/IL6	3
BP	GO:0007584	response to nutrient	6/82	219/18670	0.000405542	0.00639352	0.00433326	ACSL4/AKR1C3/HSF1/NQO1/PTGS2/HAMP	6
BP	GO:0019216	regulation of lipid metabolic process	8/82	410/18670	0.000436029	0.00683597	0.00463313	PRKAA2/TAZ/AKR1C3/SRC/PLIN2/CAV1/PTGS2/TXNRD1	8
BP	GO:0010574	regulation of vascular endothelial growth factor production	3/82	34/18670	0.000442922	0.00690566	0.00468036	NOX1/PTGS2/IL6	3
BP	GO:0051384	response to glucocorticoid	5/82	146/18670	0.000459314	0.0071219	0.00482692	ZFP36/PTGS2/DUSP1/DDIT4/IL6	5
BP	GO:0046209	nitric oxide metabolic process	4/82	82/18670	0.000465994	0.00718599	0.00487036	NQO1/CAV1/PTGS2/NOS2	4
BP	GO:0002262	myeloid cell homeostasis	5/82	147/18670	0.000473866	0.00726767	0.00492572	G6PD/BAP1/SLC7A11/ZFP36/IL6	5
BP	GO:0070371	ERK1 and ERK2 cascade	7/82	317/18670	0.000487123	0.00737588	0.00499906	NOX4/HRAS/MAPK3/ATF3/SRC/DUSP1/MT3	7
BP	GO:0042509	regulation of tyrosine phosphorylation of STAT protein	4/82	83/18670	0.000487965	0.00737588	0.00499906	HSF1/NF2/CAV1/IL6	4
BP	GO:0051592	response to calcium ion	5/82	148/18670	0.000488763	0.00737588	0.00499906	PRKAA2/AKR1C3/HSPA5/CAV1/DUSP1	5
BP	GO:0014074	response to purine-containing compound	5/82	149/18670	0.00050401	0.00756551	0.00512758	NOX4/DUOX1/HSPA5/PTGS2/DUSP1	5
BP	GO:0043154	negative regulation of cysteine-type endopeptidase activity involved in apoptotic process	4/82	84/18670	0.000510664	0.00762484	0.00516779	DNAJB6/SRC/PTGS2/MT3	4
BP	GO:0010573	vascular endothelial growth factor production	3/82	36/18670	0.000525155	0.00779993	0.00528646	NOX1/PTGS2/IL6	3
BP	GO:0045682	regulation of epidermis development	4/82	85/18670	0.000534105	0.00785023	0.00532055	ALOX15B/TP63/ZFP36/MAFG	4
BP	GO:2001057	reactive nitrogen species metabolic process	4/82	85/18670	0.000534105	0.00785023	0.00532055	NQO1/CAV1/PTGS2/NOS2	4
BP	GO:0009896	positive regulation of catabolic process	8/82	425/18670	0.000552644	0.00802669	0.00544015	MAPK3/PRKAA2/EGLN2/HSF1/ZFP36/CAV1/IL6/AURKA	8
BP	GO:0052548	regulation of endopeptidase activity	8/82	425/18670	0.000552644	0.00802669	0.00544015	ALOX12/DNAJB6/HSF1/SRC/PML/TP63/PTGS2/MT3	8
BP	GO:1903829	positive regulation of cellular protein localization	7/82	324/18670	0.000554644	0.00802669	0.00544015	HRAS/PRKAA2/BAP1/SQSTM1/SRC/TP63/PTGS2	7
BP	GO:0007260	tyrosine phosphorylation of STAT protein	4/82	86/18670	0.000558302	0.0080384	0.00544809	HSF1/NF2/CAV1/IL6	4
BP	GO:0038083	peptidyl-tyrosine autophosphorylation	3/82	37/18670	0.000569688	0.00816071	0.00553098	MAPK3/SRC/CAV1	3
BP	GO:0071453	cellular response to oxygen levels	6/82	234/18670	0.000575433	0.00820138	0.00555854	NOX1/EGLN2/SRC/CAV1/PTGS2/MT3	6
BP	GO:0016572	histone phosphorylation	3/82	38/18670	0.000616567	0.00874348	0.00592596	MAPK3/PRKAA2/AURKA	3
BP	GO:0030856	regulation of epithelial cell differentiation	5/82	156/18670	0.000620994	0.00876223	0.00593866	ALOX15B/TP63/ZFP36/CAV1/MAFG	5
BP	GO:0052126	movement in host environment	5/82	158/18670	0.000657877	0.00923647	0.00626009	TFRC/SLC1A5/SRC/PML/CAV1	5
BP	GO:0046849	bone remodeling	4/82	90/18670	0.000662919	0.00925616	0.00627343	NOX4/TFRC/SRC/IL6	4
BP	GO:0008207	C21-steroid hormone metabolic process	3/82	39/18670	0.00066584	0.00925616	0.00627343	AKR1C1/AKR1C2/AKR1C3	3
BP	GO:0051222	positive regulation of protein transport	8/82	440/18670	0.000693389	0.00959188	0.00650097	HRAS/ALOX15B/MAPK3/BAP1/SRC/TP63/PTGS2/IL6	8
BP	GO:0043405	regulation of MAP kinase activity	7/82	337/18670	0.000699721	0.00963226	0.00652834	NOX4/HRAS/MAPK3/SRC/CAV1/DUSP1/DRD4	7
BP	GO:0035967	cellular response to topologically incorrect protein	5/82	161/18670	0.000716251	0.00977008	0.00662175	ATF3/HSF1/HSPA5/ASNS/DDIT3	5
BP	GO:0045124	regulation of bone resorption	3/82	40/18670	0.000717557	0.00977008	0.00662175	TFRC/SRC/IL6	3
BP	GO:2000117	negative regulation of cysteine-type endopeptidase activity	4/82	92/18670	0.000720119	0.00977008	0.00662175	DNAJB6/SRC/PTGS2/MT3	4
BP	GO:0036473	cell death in response to oxidative stress	4/82	93/18670	0.000749991	0.0101267	0.00686343	NOX1/SLC7A11/HSPB1/PML	4
BP	GO:0045616	regulation of keratinocyte differentiation	3/82	41/18670	0.000771764	0.010371	0.00702905	ALOX15B/TP63/ZFP36	3
BP	GO:0071383	cellular response to steroid hormone stimulus	6/82	248/18670	0.000779679	0.0103925	0.00704362	EGLN2/AKR1C3/SRC/TP63/ZFP36/DDIT4	6
BP	GO:1901216	positive regulation of neuron death	4/82	94/18670	0.000780729	0.0103925	0.00704362	MYB/NQO1/DDIT4/DDIT3	4
BP	GO:0045926	negative regulation of growth	6/82	249/18670	0.000796165	0.0105482	0.00714915	G6PD/ALOX15B/CDKN2A/MT1G/PML/MT3	6
BP	GO:0046688	response to copper ion	3/82	42/18670	0.00082851	0.0109255	0.00740483	HSF1/MT1G/MT3	3
BP	GO:0035672	oligopeptide transmembrane transport	2/82	10/18670	0.000838141	0.0109502	0.00742155	ABCC1/SLC7A11	2
BP	GO:0036500	ATF6-mediated unfolded protein response	2/82	10/18670	0.000838141	0.0109502	0.00742155	HSPA5/DDIT3	2
BP	GO:0048010	vascular endothelial growth factor receptor signaling pathway	4/82	96/18670	0.000844859	0.0109871	0.00744656	HSPB1/SRC/NCF2/MT3	4
BP	GO:1904951	positive regulation of establishment of protein localization	8/82	456/18670	0.000874104	0.0111736	0.00757302	HRAS/ALOX15B/MAPK3/BAP1/SRC/TP63/PTGS2/IL6	8
BP	GO:0051591	response to cAMP	4/82	97/18670	0.000878278	0.0111736	0.00757302	NOX4/DUOX1/HSPA5/DUSP1	4
BP	GO:0001953	negative regulation of cell-matrix adhesion	3/82	43/18670	0.00088784	0.0111736	0.00757302	CDKN2A/SRC/NF2	3
BP	GO:0006692	prostanoid metabolic process	3/82	43/18670	0.00088784	0.0111736	0.00757302	AKR1C2/AKR1C3/PTGS2	3
BP	GO:0006693	prostaglandin metabolic process	3/82	43/18670	0.00088784	0.0111736	0.00757302	AKR1C2/AKR1C3/PTGS2	3
BP	GO:0008631	intrinsic apoptotic signaling pathway in response to oxidative stress	3/82	43/18670	0.00088784	0.0111736	0.00757302	NOX1/HSPB1/PML	3
BP	GO:0072348	sulfur compound transport	3/82	43/18670	0.00088784	0.0111736	0.00757302	ABCC1/SLC7A11/SLC1A4	3
BP	GO:0048660	regulation of smooth muscle cell proliferation	5/82	169/18670	0.000890882	0.0111736	0.00757302	NOX1/ALOX12/MYB/PTGS2/IL6	5
BP	GO:0030038	contractile actin filament bundle assembly	4/82	98/18670	0.000912619	0.0113454	0.00768945	NOX4/SRC/NF2/STMN1	4
BP	GO:0043149	stress fiber assembly	4/82	98/18670	0.000912619	0.0113454	0.00768945	NOX4/SRC/NF2/STMN1	4
BP	GO:0010634	positive regulation of epithelial cell migration	5/82	171/18670	0.000939099	0.0115727	0.00784345	ALOX12/HSPB1/SRC/ENPP2/PTGS2	5
BP	GO:0048659	smooth muscle cell proliferation	5/82	171/18670	0.000939099	0.0115727	0.00784345	NOX1/ALOX12/MYB/PTGS2/IL6	5
BP	GO:1901570	fatty acid derivative biosynthetic process	4/82	99/18670	0.000947896	0.0115896	0.00785492	ACSL4/ALOX12/AKR1C3/PTGS2	4
BP	GO:0001505	regulation of neurotransmitter levels	7/82	355/18670	0.000948686	0.0115896	0.00785492	SLC38A1/SLC7A11/NQO1/CAV1/PTGS2/NOS2/DRD4	7
BP	GO:0045862	positive regulation of proteolysis	7/82	358/18670	0.000996233	0.0121118	0.00820885	ALOX12/MAPK3/HSF1/SRC/PML/CAV1/AURKA	7
BP	GO:0042771	intrinsic apoptotic signaling pathway in response to DNA damage by p53 class mediator	3/82	45/18670	0.00101444	0.0121118	0.00820885	PML/TP63/DDIT4	3
BP	GO:0006857	oligopeptide transport	2/82	11/18670	0.00102147	0.0121118	0.00820885	ABCC1/SLC7A11	2
BP	GO:0019371	cyclooxygenase pathway	2/82	11/18670	0.00102147	0.0121118	0.00820885	AKR1C3/PTGS2	2
BP	GO:0035404	histone-serine phosphorylation	2/82	11/18670	0.00102147	0.0121118	0.00820885	PRKAA2/AURKA	2
BP	GO:0090084	negative regulation of inclusion body assembly	2/82	11/18670	0.00102147	0.0121118	0.00820885	DNAJB6/HSF1	2
BP	GO:2000392	regulation of lamellipodium morphogenesis	2/82	11/18670	0.00102147	0.0121118	0.00820885	SRC/ENPP2	2
BP	GO:0003018	vascular process in circulatory system	5/82	175/18670	0.00104133	0.0122956	0.00833343	ALOX12/SRC/CAV1/PTGS2/IL6	5
BP	GO:0031331	positive regulation of cellular catabolic process	7/82	362/18670	0.00106253	0.0124605	0.00844518	MAPK3/PRKAA2/HSF1/ZFP36/CAV1/IL6/AURKA	7
BP	GO:0009408	response to heat	5/82	176/18670	0.00106814	0.0124605	0.00844518	MAPK3/DNAJB6/HSF1/HSPA5/PTGS2	5
BP	GO:0001504	neurotransmitter uptake	3/82	46/18670	0.00108179	0.0124605	0.00844518	SLC38A1/SLC7A11/DRD4	3
BP	GO:0045981	positive regulation of nucleotide metabolic process	3/82	46/18670	0.00108179	0.0124605	0.00844518	PRKAA2/TAZ/NOS2	3
BP	GO:0060443	mammary gland morphogenesis	3/82	46/18670	0.00108179	0.0124605	0.00844518	SRC/PML/CAV1	3
BP	GO:1900544	positive regulation of purine nucleotide metabolic process	3/82	46/18670	0.00108179	0.0124605	0.00844518	PRKAA2/TAZ/NOS2	3
BP	GO:0050708	regulation of protein secretion	8/82	472/18670	0.00109096	0.012515	0.00848211	ALOX15B/MAPK3/SRC/PML/NOS2/IL6/DRD4/SLC2A1	8
BP	GO:0048771	tissue remodeling	5/82	179/18670	0.00115162	0.0131076	0.00888379	NOX4/TFRC/SRC/CAV1/IL6	5
BP	GO:0006953	acute-phase response	3/82	47/18670	0.00115191	0.0131076	0.00888379	PTGS2/IL6/HAMP	3
BP	GO:0043491	protein kinase B signaling	6/82	269/18670	0.00118628	0.0134446	0.00911214	NOX4/AKR1C2/AKR1C3/SRC/MT3/DDIT3	6
BP	GO:0006066	alcohol metabolic process	7/82	370/18670	0.00120554	0.0136082	0.00922303	G6PD/PRKAA2/MIOX/AKR1C1/AKR1C2/AKR1C3/MT3	7
BP	GO:0042136	neurotransmitter biosynthetic process	4/82	106/18670	0.0012222	0.0136082	0.00922306	NQO1/CAV1/PTGS2/NOS2	4
BP	GO:0006983	ER overload response	2/82	12/18670	0.00122228	0.0136082	0.00922306	HSPA5/DDIT3	2
BP	GO:1902510	regulation of apoptotic DNA fragmentation	2/82	12/18670	0.00122228	0.0136082	0.00922306	HSF1/IL6	2
BP	GO:0046850	regulation of bone remodeling	3/82	48/18670	0.00122483	0.0136082	0.00922306	TFRC/SRC/IL6	3
BP	GO:0016049	cell growth	8/82	484/18670	0.00128032	0.0141689	0.00960307	G6PD/CDKN2A/BAP1/EGLN2/PML/MT3/HAMP/AURKA	8
BP	GO:0071715	icosanoid transport	3/82	49/18670	0.00130061	0.014226	0.00964178	ABCC1/NOS2/DRD4	3
BP	GO:1901571	fatty acid derivative transport	3/82	49/18670	0.00130061	0.014226	0.00964178	ABCC1/NOS2/DRD4	3
BP	GO:2001238	positive regulation of extrinsic apoptotic signaling pathway	3/82	49/18670	0.00130061	0.014226	0.00964178	ATF3/PML/CAV1	3
BP	GO:2000278	regulation of DNA biosynthetic process	4/82	108/18670	0.00130979	0.0142712	0.0096724	NOX4/MAPK3/SRC/DUSP1	4
BP	GO:0014009	glial cell proliferation	3/82	50/18670	0.00137927	0.0149703	0.0101463	MYB/NF2/IL6	3
BP	GO:0009165	nucleotide biosynthetic process	6/82	278/18670	0.00140346	0.0151166	0.0102454	ACSL4/TAZ/PTGS2/NOS2/NNMT/RRM2	6
BP	GO:0030522	intracellular receptor signaling pathway	6/82	278/18670	0.00140346	0.0151166	0.0102454	ALOX15B/EGLN2/AKR1C3/SRC/PML/TP63	6
BP	GO:0042532	negative regulation of tyrosine phosphorylation of STAT protein	2/82	13/18670	0.0014404	0.0154555	0.0104751	NF2/CAV1	2
BP	GO:0031349	positive regulation of defense response	7/82	384/18670	0.00149183	0.0159467	0.010808	NRAS/HRAS/MAPK3/ABCC1/SRC/PTGS2/IL6	7
BP	GO:1901293	nucleoside phosphate biosynthetic process	6/82	282/18670	0.0015092	0.0160716	0.0108926	ACSL4/TAZ/PTGS2/NOS2/NNMT/RRM2	6
BP	GO:0007565	female pregnancy	5/82	192/18670	0.00157033	0.0165605	0.011224	ACSL4/MAPK3/HSF1/PTGS2/SLC2A1	5
BP	GO:0050731	positive regulation of peptidyl-tyrosine phosphorylation	5/82	192/18670	0.00157033	0.0165605	0.011224	NOX4/HSF1/SRC/ENPP2/IL6	5
BP	GO:0002791	regulation of peptide secretion	8/82	500/18670	0.00157272	0.0165605	0.011224	ALOX15B/MAPK3/SRC/PML/NOS2/IL6/DRD4/SLC2A1	8
BP	GO:0034976	response to endoplasmic reticulum stress	6/82	285/18670	0.00159242	0.0167056	0.0113223	ATF3/HSPA5/PML/CAV1/ASNS/DDIT3	6
BP	GO:0010043	response to zinc ion	3/82	53/18670	0.00163299	0.0170677	0.0115678	MT1G/MT3/HAMP	3
BP	GO:0034356	NAD biosynthesis via nicotinamide riboside salvage pathway	2/82	14/18670	0.00167568	0.0171955	0.0116544	PTGS2/NNMT	2
BP	GO:0036295	cellular response to increased oxygen levels	2/82	14/18670	0.00167568	0.0171955	0.0116544	NOX1/CAV1	2
BP	GO:0038166	angiotensin-activated signaling pathway	2/82	14/18670	0.00167568	0.0171955	0.0116544	SRC/CAV1	2
BP	GO:0042574	retinal metabolic process	2/82	14/18670	0.00167568	0.0171955	0.0116544	AKR1C1/AKR1C3	2
BP	GO:1903624	regulation of DNA catabolic process	2/82	14/18670	0.00167568	0.0171955	0.0116544	HSF1/IL6	2
BP	GO:0046164	alcohol catabolic process	3/82	54/18670	0.00172361	0.0176232	0.0119443	MIOX/AKR1C3/MT3	3
BP	GO:0010952	positive regulation of peptidase activity	5/82	197/18670	0.00175795	0.0179096	0.0121383	ALOX12/MAPK3/HSF1/PML/CAV1	5
BP	GO:0009410	response to xenobiotic stimulus	6/82	292/18670	0.00180019	0.0182738	0.0123852	AKR1C1/HSF1/NQO1/HSPA5/DDIT4/DRD4	6
BP	GO:0046456	icosanoid biosynthetic process	3/82	55/18670	0.00181731	0.0183815	0.0124582	ALOX12/AKR1C3/PTGS2	3
BP	GO:0048511	rhythmic process	6/82	295/18670	0.00189528	0.0190942	0.0129413	PRKAA2/HSPA5/SRC/PML/NOS2/DRD4	6
BP	GO:0010273	detoxification of copper ion	2/82	15/18670	0.00192797	0.0190942	0.0129413	MT1G/MT3	2
BP	GO:0035635	entry of bacterium into host cell	2/82	15/18670	0.00192797	0.0190942	0.0129413	SRC/CAV1	2
BP	GO:1900119	positive regulation of execution phase of apoptosis	2/82	15/18670	0.00192797	0.0190942	0.0129413	HSF1/IL6	2
BP	GO:1990169	stress response to copper ion	2/82	15/18670	0.00192797	0.0190942	0.0129413	MT1G/MT3	2
BP	GO:0022612	gland morphogenesis	4/82	120/18670	0.00192948	0.0190942	0.0129413	SRC/PML/TP63/CAV1	4
BP	GO:0022407	regulation of cell-cell adhesion	7/82	402/18670	0.00193514	0.0190942	0.0129413	TFRC/ALOX12/MYB/SRC/NF2/CAV1/IL6	7
BP	GO:0050870	positive regulation of T cell activation	5/82	202/18670	0.00196155	0.0192204	0.0130268	TFRC/MYB/SRC/CAV1/IL6	5
BP	GO:0051701	interaction with host	5/82	202/18670	0.00196155	0.0192204	0.0130268	TFRC/SLC1A5/SRC/PML/CAV1	5
BP	GO:0030968	endoplasmic reticulum unfolded protein response	4/82	121/18670	0.00198886	0.0193536	0.0131171	ATF3/HSPA5/ASNS/DDIT3	4
BP	GO:1903578	regulation of ATP metabolic process	4/82	121/18670	0.00198886	0.0193536	0.0131171	PRKAA2/TAZ/DDIT4/SLC2A6	4
BP	GO:0042743	hydrogen peroxide metabolic process	3/82	57/18670	0.00201412	0.0194653	0.0131927	NOX1/DUOX1/MT3	3
BP	GO:0043525	positive regulation of neuron apoptotic process	3/82	57/18670	0.00201412	0.0194653	0.0131927	MYB/NQO1/DDIT3	3
BP	GO:1901605	alpha-amino acid metabolic process	5/82	204/18670	0.00204763	0.0197216	0.0133664	NOX4/GLS2/SLC7A11/NOS2/ASNS	5
BP	GO:0015893	drug transport	5/82	205/18670	0.0020917	0.0200774	0.0136076	SLC1A5/ABCC1/SLC7A11/SLC7A5/DRD4	5
BP	GO:0017001	antibiotic catabolic process	3/82	58/18670	0.00211731	0.0201859	0.0136812	DUOX1/AKR1C3/MT3	3
BP	GO:0030520	intracellular estrogen receptor signaling pathway	3/82	58/18670	0.00211731	0.0201859	0.0136812	EGLN2/SRC/TP63	3
BP	GO:0046717	acid secretion	4/82	124/18670	0.00217455	0.020463	0.013869	SLC1A5/GLS2/NOS2/DRD4	4
BP	GO:0001780	neutrophil homeostasis	2/82	16/18670	0.00219713	0.020463	0.013869	SLC7A11/IL6	2
BP	GO:0032225	regulation of synaptic transmission, dopaminergic	2/82	16/18670	0.00219713	0.020463	0.013869	PTGS2/DRD4	2
BP	GO:0034975	protein folding in endoplasmic reticulum	2/82	16/18670	0.00219713	0.020463	0.013869	EMC2/HSPA5	2
BP	GO:0051238	sequestering of metal ion	2/82	16/18670	0.00219713	0.020463	0.013869	FTH1/FTL	2
BP	GO:0086103	G protein-coupled receptor signaling pathway involved in heart process	2/82	16/18670	0.00219713	0.020463	0.013869	SRC/CAV1	2
BP	GO:0090083	regulation of inclusion body assembly	2/82	16/18670	0.00219713	0.020463	0.013869	DNAJB6/HSF1	2
BP	GO:0070527	platelet aggregation	3/82	59/18670	0.00222372	0.0206426	0.0139907	ALOX12/SLC7A11/HSPB1	3
BP	GO:0045471	response to ethanol	4/82	125/18670	0.00223902	0.0207165	0.0140407	G6PD/NQO1/HAMP/DRD4	4
BP	GO:0009612	response to mechanical stimulus	5/82	210/18670	0.00232249	0.0214185	0.0145165	MAPK3/SRC/PTGS2/ASNS/SLC2A1	5
BP	GO:0032507	maintenance of protein location in cell	3/82	60/18670	0.0023334	0.0214491	0.0145373	HSPA5/PML/CAV1	3
BP	GO:0001558	regulation of cell growth	7/82	416/18670	0.00234582	0.0214932	0.0145672	G6PD/CDKN2A/BAP1/EGLN2/PML/MT3/HAMP	7
BP	GO:0071384	cellular response to corticosteroid stimulus	3/82	61/18670	0.00244638	0.0222445	0.0150764	AKR1C3/ZFP36/DDIT4	3
BP	GO:2001244	positive regulation of intrinsic apoptotic signaling pathway	3/82	61/18670	0.00244638	0.0222445	0.0150764	NOX1/CAV1/DDIT3	3
BP	GO:0032460	negative regulation of protein oligomerization	2/82	17/18670	0.002483	0.0222445	0.0150764	SRC/ALB	2
BP	GO:0061687	detoxification of inorganic compound	2/82	17/18670	0.002483	0.0222445	0.0150764	MT1G/MT3	2
BP	GO:0072673	lamellipodium morphogenesis	2/82	17/18670	0.002483	0.0222445	0.0150764	SRC/ENPP2	2
BP	GO:2000641	regulation of early endosome to late endosome transport	2/82	17/18670	0.002483	0.0222445	0.0150764	MAPK3/SRC	2
BP	GO:2000811	negative regulation of anoikis	2/82	17/18670	0.002483	0.0222445	0.0150764	SRC/CAV1	2
BP	GO:0070374	positive regulation of ERK1 and ERK2 cascade	5/82	215/18670	0.00257132	0.0229628	0.0155632	NOX4/HRAS/MAPK3/SRC/MT3	5
BP	GO:0050863	regulation of T cell activation	6/82	314/18670	0.00258899	0.0230478	0.0156208	TFRC/MYB/FANCD2/SRC/CAV1/IL6	6
BP	GO:0031333	negative regulation of protein-containing complex assembly	4/82	132/18670	0.00272766	0.0240717	0.0163148	SRC/ALB/STMN1/CAPG	4
BP	GO:0045598	regulation of fat cell differentiation	4/82	132/18670	0.00272766	0.0240717	0.0163148	ZFP36/PTGS2/DDIT3/IL6	4
BP	GO:1903039	positive regulation of leukocyte cell-cell adhesion	5/82	218/18670	0.00272961	0.0240717	0.0163148	TFRC/MYB/SRC/CAV1/IL6	5
BP	GO:0002699	positive regulation of immune effector process	5/82	219/18670	0.00278391	0.0244052	0.0165408	TFRC/MAPK3/MYB/NOS2/IL6	5
BP	GO:0001933	negative regulation of protein phosphorylation	7/82	429/18670	0.00278471	0.0244052	0.0165408	CDKN2A/ATF3/HSPB1/NF2/CAV1/DUSP1/DDIT4	7
BP	GO:2000378	negative regulation of reactive oxygen species metabolic process	3/82	64/18670	0.00280546	0.0245109	0.0166124	G6PD/CAV1/MT3	3
BP	GO:0032355	response to estradiol	4/82	134/18670	0.00287968	0.0250045	0.016947	HSF1/NQO1/PTGS2/DUSP1	4
BP	GO:0044409	entry into host	4/82	134/18670	0.00287968	0.0250045	0.016947	TFRC/SLC1A5/SRC/CAV1	4
BP	GO:0044706	multi-multicellular organism process	5/82	222/18670	0.00295151	0.0255496	0.0173164	ACSL4/MAPK3/HSF1/PTGS2/SLC2A1	5
BP	GO:0009615	response to virus	6/82	323/18670	0.00297744	0.0256952	0.0174151	HSPB1/SRC/PML/DDIT4/IL6/STMN1	6
BP	GO:0007292	female gamete generation	4/82	136/18670	0.0030374	0.0261328	0.0177117	HSF1/SRC/PTGS2/AURKA	4
BP	GO:0042908	xenobiotic transport	2/82	19/18670	0.00310428	0.0263864	0.0178836	ABCC1/SLC2A1	2
BP	GO:0060252	positive regulation of glial cell proliferation	2/82	19/18670	0.00310428	0.0263864	0.0178836	MYB/IL6	2
BP	GO:0071243	cellular response to arsenic-containing substance	2/82	19/18670	0.00310428	0.0263864	0.0178836	ATF3/HSF1	2
BP	GO:1902074	response to salt	2/82	19/18670	0.00310428	0.0263864	0.0178836	HSF1/HSPA5	2
BP	GO:0046425	regulation of receptor signaling pathway via JAK-STAT	4/82	137/18670	0.00311844	0.0264271	0.0179112	HSF1/NF2/CAV1/IL6	4
BP	GO:2000573	positive regulation of DNA biosynthetic process	3/82	67/18670	0.00319542	0.0269984	0.0182984	NOX4/MAPK3/SRC	3
BP	GO:0033135	regulation of peptidyl-serine phosphorylation	4/82	139/18670	0.00328492	0.0276718	0.0187547	CAV1/PTGS2/DDIT4/IL6	4
BP	GO:0010812	negative regulation of cell-substrate adhesion	3/82	68/18670	0.00333241	0.0278226	0.018857	CDKN2A/SRC/NF2	3
BP	GO:0019915	lipid storage	3/82	68/18670	0.00333241	0.0278226	0.018857	PLIN2/CAV1/IL6	3
BP	GO:0050891	multicellular organismal water homeostasis	3/82	68/18670	0.00333241	0.0278226	0.018857	ALOX12/TP63/STMN1	3
BP	GO:0008202	steroid metabolic process	6/82	331/18670	0.00335803	0.0279539	0.0189459	G6PD/PRKAA2/AKR1C1/AKR1C2/AKR1C3/MT3	6
BP	GO:0010042	response to manganese ion	2/82	20/18670	0.0034394	0.0283801	0.0192348	HSPA5/PTGS2	2
BP	GO:0034755	iron ion transmembrane transport	2/82	20/18670	0.0034394	0.0283801	0.0192348	HAMP/STEAP3	2
BP	GO:0071636	positive regulation of transforming growth factor beta production	2/82	20/18670	0.0034394	0.0283801	0.0192348	MYB/PTGS2	2
BP	GO:0015909	long-chain fatty acid transport	3/82	69/18670	0.00347295	0.0285733	0.0193658	PRKAA2/PLIN2/DRD4	3
BP	GO:0051188	cofactor biosynthetic process	5/82	231/18670	0.00349815	0.0286971	0.0194497	DUOX1/ACSL4/SLC7A11/PTGS2/NNMT	5
BP	GO:0006469	negative regulation of protein kinase activity	5/82	235/18670	0.00376311	0.0307391	0.0208336	CDKN2A/HSPB1/NF2/CAV1/DUSP1	5
BP	GO:0051900	regulation of mitochondrial depolarization	2/82	21/18670	0.00379064	0.0307391	0.0208336	ALOX12/SRC	2
BP	GO:0055093	response to hyperoxia	2/82	21/18670	0.00379064	0.0307391	0.0208336	NOX1/CAV1	2
BP	GO:0071498	cellular response to fluid shear stress	2/82	21/18670	0.00379064	0.0307391	0.0208336	SRC/PTGS2	2
BP	GO:0071901	negative regulation of protein serine/threonine kinase activity	4/82	145/18670	0.00382055	0.0308928	0.0209378	CDKN2A/HSPB1/CAV1/DUSP1	4
BP	GO:1904892	regulation of receptor signaling pathway via STAT	4/82	146/18670	0.00391523	0.0315679	0.0213954	HSF1/NF2/CAV1/IL6	4
BP	GO:0033002	muscle cell proliferation	5/82	239/18670	0.00404218	0.0324987	0.0220262	NOX1/ALOX12/MYB/PTGS2/IL6	5
BP	GO:0031100	animal organ regeneration	3/82	73/18670	0.0040712	0.032639	0.0221213	HAMP/NNMT/AURKA	3
BP	GO:0061041	regulation of wound healing	4/82	148/18670	0.00410935	0.0327974	0.0222287	DUOX1/HRAS/ALOX12/CAV1	4
BP	GO:0050663	cytokine secretion	5/82	240/18670	0.0041142	0.0327974	0.0222287	ALOX15B/MAPK3/SRC/PML/NOS2	5
BP	GO:0031281	positive regulation of cyclase activity	2/82	22/18670	0.00415787	0.0329593	0.0223384	MAPK3/NOS2	2
BP	GO:0060547	negative regulation of necrotic cell death	2/82	22/18670	0.00415787	0.0329593	0.0223384	CAV1/MT3	2
BP	GO:0030104	water homeostasis	3/82	74/18670	0.00422992	0.0333431	0.0225985	ALOX12/TP63/STMN1	3
BP	GO:1901616	organic hydroxy compound catabolic process	3/82	74/18670	0.00422992	0.0333431	0.0225985	MIOX/AKR1C3/MT3	3
BP	GO:0006520	cellular amino acid metabolic process	6/82	348/18670	0.00428619	0.0336926	0.0228354	NOX4/GLS2/SLC7A11/NQO1/NOS2/ASNS	6
BP	GO:0009266	response to temperature stimulus	5/82	243/18670	0.00433578	0.0339877	0.0230354	MAPK3/DNAJB6/HSF1/HSPA5/PTGS2	5
BP	GO:1903201	regulation of oxidative stress-induced cell death	3/82	75/18670	0.00439235	0.0343358	0.0232713	NOX1/SLC7A11/HSPB1	3
BP	GO:0051896	regulation of protein kinase B signaling	5/82	244/18670	0.0044115	0.0343552	0.0232845	NOX4/AKR1C2/AKR1C3/SRC/DDIT3	5
BP	GO:0051260	protein homooligomerization	6/82	351/18670	0.00446791	0.0343552	0.0232845	SLC1A5/AKR1C1/HSF1/SRC/TP63/CAV1	6
BP	GO:0042326	negative regulation of phosphorylation	7/82	468/18670	0.00448683	0.0343552	0.0232845	CDKN2A/ATF3/HSPB1/NF2/CAV1/DUSP1/DDIT4	7
BP	GO:0001890	placenta development	4/82	152/18670	0.00451692	0.0343552	0.0232845	MAPK3/DNAJB6/HSF1/PTGS2	4
BP	GO:0006541	glutamine metabolic process	2/82	23/18670	0.00454093	0.0343552	0.0232845	GLS2/ASNS	2
BP	GO:0010447	response to acidic pH	2/82	23/18670	0.00454093	0.0343552	0.0232845	NOX1/SRC	2
BP	GO:0030810	positive regulation of nucleotide biosynthetic process	2/82	23/18670	0.00454093	0.0343552	0.0232845	TAZ/NOS2	2
BP	GO:0051882	mitochondrial depolarization	2/82	23/18670	0.00454093	0.0343552	0.0232845	ALOX12/SRC	2
BP	GO:0070841	inclusion body assembly	2/82	23/18670	0.00454093	0.0343552	0.0232845	DNAJB6/HSF1	2
BP	GO:0071294	cellular response to zinc ion	2/82	23/18670	0.00454093	0.0343552	0.0232845	MT1G/MT3	2
BP	GO:0089718	amino acid import across plasma membrane	2/82	23/18670	0.00454093	0.0343552	0.0232845	SLC1A5/SLC7A11	2
BP	GO:1900373	positive regulation of purine nucleotide biosynthetic process	2/82	23/18670	0.00454093	0.0343552	0.0232845	TAZ/NOS2	2
BP	GO:0048872	homeostasis of number of cells	5/82	246/18670	0.00456577	0.0344508	0.0233493	G6PD/BAP1/SLC7A11/ZFP36/IL6	5
BP	GO:0042133	neurotransmitter metabolic process	4/82	153/18670	0.00462292	0.0346965	0.0235158	NQO1/CAV1/PTGS2/NOS2	4
BP	GO:0051017	actin filament bundle assembly	4/82	153/18670	0.00462292	0.0346965	0.0235158	NOX4/SRC/NF2/STMN1	4
BP	GO:0006110	regulation of glycolytic process	3/82	77/18670	0.00472847	0.0353946	0.0239889	PRKAA2/DDIT4/SLC2A6	3
BP	GO:0071560	cellular response to transforming growth factor beta stimulus	5/82	249/18670	0.00480434	0.0357882	0.0242557	NOX4/HSPA5/SRC/PML/CAV1	5
BP	GO:0016569	covalent chromatin modification	7/82	474/18670	0.00480643	0.0357882	0.0242557	MAPK3/MYB/PRKAA2/BAP1/HELLS/MT3/AURKA	7
BP	GO:2001236	regulation of extrinsic apoptotic signaling pathway	4/82	155/18670	0.00483991	0.0359427	0.0243604	ATF3/SRC/PML/CAV1	4
BP	GO:0072332	intrinsic apoptotic signaling pathway by p53 class mediator	3/82	78/18670	0.00490221	0.0361134	0.0244761	PML/TP63/DDIT4	3
BP	GO:0090398	cellular senescence	3/82	78/18670	0.00490221	0.0361134	0.0244761	HRAS/CDKN2A/PML	3
BP	GO:0046426	negative regulation of receptor signaling pathway via JAK-STAT	2/82	24/18670	0.00493968	0.0361134	0.0244761	NF2/CAV1	2
BP	GO:0046697	decidualization	2/82	24/18670	0.00493968	0.0361134	0.0244761	MAPK3/PTGS2	2
BP	GO:1903649	regulation of cytoplasmic transport	2/82	24/18670	0.00493968	0.0361134	0.0244761	MAPK3/SRC	2
BP	GO:2000209	regulation of anoikis	2/82	24/18670	0.00493968	0.0361134	0.0244761	SRC/CAV1	2
BP	GO:0043271	negative regulation of ion transport	4/82	157/18670	0.00506366	0.0365185	0.0247507	CAV1/PTGS2/HAMP/DRD4	4
BP	GO:0043467	regulation of generation of precursor metabolites and energy	4/82	157/18670	0.00506366	0.0365185	0.0247507	PRKAA2/NOS2/DDIT4/SLC2A6	4
BP	GO:0061572	actin filament bundle organization	4/82	157/18670	0.00506366	0.0365185	0.0247507	NOX4/SRC/NF2/STMN1	4
BP	GO:0043536	positive regulation of blood vessel endothelial cell migration	3/82	79/18670	0.00507976	0.0365185	0.0247507	ALOX12/HSPB1/PTGS2	3
BP	GO:0071260	cellular response to mechanical stimulus	3/82	79/18670	0.00507976	0.0365185	0.0247507	MAPK3/PTGS2/SLC2A1	3
BP	GO:1900034	regulation of cellular response to heat	3/82	79/18670	0.00507976	0.0365185	0.0247507	MAPK3/DNAJB6/HSF1	3
BP	GO:0070838	divalent metal ion transport	7/82	479/18670	0.00508568	0.0365185	0.0247507	G6PD/PML/CAV1/PTGS2/MT3/DDIT3/DRD4	7
BP	GO:0051924	regulation of calcium ion transport	5/82	254/18670	0.00522147	0.0373985	0.0253471	G6PD/PML/CAV1/PTGS2/DRD4	5
BP	GO:0007259	receptor signaling pathway via JAK-STAT	4/82	159/18670	0.00529426	0.0376782	0.0255367	HSF1/NF2/CAV1/IL6	4
BP	GO:0022409	positive regulation of cell-cell adhesion	5/82	255/18670	0.00530788	0.0376782	0.0255367	TFRC/MYB/SRC/CAV1/IL6	5
BP	GO:0071559	response to transforming growth factor beta	5/82	255/18670	0.00530788	0.0376782	0.0255367	NOX4/HSPA5/SRC/PML/CAV1	5
BP	GO:0009299	mRNA transcription	2/82	25/18670	0.00535399	0.0376782	0.0255367	HSF1/DDIT3	2
BP	GO:0019430	removal of superoxide radicals	2/82	25/18670	0.00535399	0.0376782	0.0255367	NQO1/MT3	2
BP	GO:0060444	branching involved in mammary gland duct morphogenesis	2/82	25/18670	0.00535399	0.0376782	0.0255367	SRC/PML	2
BP	GO:0061050	regulation of cell growth involved in cardiac muscle cell development	2/82	25/18670	0.00535399	0.0376782	0.0255367	G6PD/HAMP	2
BP	GO:0032204	regulation of telomere maintenance	3/82	81/18670	0.00544639	0.0379499	0.0257208	MAPK3/SRC/PML	3
BP	GO:0033238	regulation of cellular amine metabolic process	3/82	81/18670	0.00544639	0.0379499	0.0257208	SLC7A11/NQO1/DRD4	3
BP	GO:0034109	homotypic cell-cell adhesion	3/82	81/18670	0.00544639	0.0379499	0.0257208	ALOX12/SLC7A11/HSPB1	3
BP	GO:0048708	astrocyte differentiation	3/82	81/18670	0.00544639	0.0379499	0.0257208	MAPK3/MT3/IL6	3
BP	GO:0033673	negative regulation of kinase activity	5/82	257/18670	0.00548375	0.0381144	0.0258323	CDKN2A/HSPB1/NF2/CAV1/DUSP1	5
BP	GO:0072511	divalent inorganic cation transport	7/82	486/18670	0.00549701	0.0381144	0.0258323	G6PD/PML/CAV1/PTGS2/MT3/DDIT3/DRD4	7
BP	GO:0043406	positive regulation of MAP kinase activity	5/82	258/18670	0.00557321	0.038548	0.0261262	NOX4/HRAS/MAPK3/SRC/DRD4	5
BP	GO:0032386	regulation of intracellular transport	6/82	370/18670	0.00575405	0.0397015	0.026908	HRAS/MAPK3/BAP1/SRC/TP63/PTGS2	6
BP	GO:0006309	apoptotic DNA fragmentation	2/82	26/18670	0.0057837	0.039712	0.0269151	HSF1/IL6	2
BP	GO:0043090	amino acid import	2/82	26/18670	0.0057837	0.039712	0.0269151	SLC1A5/SLC7A11	2
BP	GO:0048145	regulation of fibroblast proliferation	3/82	83/18670	0.00582855	0.0398261	0.0269924	MYB/FTH1/PML	3
BP	GO:0071277	cellular response to calcium ion	3/82	83/18670	0.00582855	0.0398261	0.0269924	PRKAA2/AKR1C3/HSPA5	3
BP	GO:0034504	protein localization to nucleus	5/82	262/18670	0.00594141	0.0404992	0.0274486	DNAJB6/SRC/PML/NF2/PTGS2	5
BP	GO:0048144	fibroblast proliferation	3/82	84/18670	0.00602551	0.0406965	0.0275824	MYB/FTH1/PML	3
BP	GO:0051492	regulation of stress fiber assembly	3/82	84/18670	0.00602551	0.0406965	0.0275824	NOX4/NF2/STMN1	3
BP	GO:1905897	regulation of response to endoplasmic reticulum stress	3/82	84/18670	0.00602551	0.0406965	0.0275824	HSPA5/CAV1/DDIT3	3
BP	GO:0007093	mitotic cell cycle checkpoint	4/82	165/18670	0.00602805	0.0406965	0.0275824	HRAS/PML/DUSP1/AURKA	4
BP	GO:0050727	regulation of inflammatory response	6/82	374/18670	0.00605612	0.0407885	0.0276447	BAP1/ABCC1/FANCD2/PTGS2/NOS2/IL6	6
BP	GO:0006914	autophagy	7/82	496/18670	0.00612746	0.0410729	0.0278375	MAPK3/PRKAA2/HSPB1/SQSTM1/SRC/MT3/DDIT3	7
BP	GO:0061919	process utilizing autophagic mechanism	7/82	496/18670	0.00612746	0.0410729	0.0278375	MAPK3/PRKAA2/HSPB1/SQSTM1/SRC/MT3/DDIT3	7
BP	GO:0034308	primary alcohol metabolic process	3/82	85/18670	0.00622642	0.0412614	0.0279652	AKR1C1/AKR1C2/AKR1C3	3
BP	GO:0000188	inactivation of MAPK activity	2/82	27/18670	0.00622869	0.0412614	0.0279652	CAV1/DUSP1	2
BP	GO:0071450	cellular response to oxygen radical	2/82	27/18670	0.00622869	0.0412614	0.0279652	NQO1/MT3	2
BP	GO:0071451	cellular response to superoxide	2/82	27/18670	0.00622869	0.0412614	0.0279652	NQO1/MT3	2
BP	GO:1902175	regulation of oxidative stress-induced intrinsic apoptotic signaling pathway	2/82	27/18670	0.00622869	0.0412614	0.0279652	NOX1/HSPB1	2
BP	GO:0035051	cardiocyte differentiation	4/82	167/18670	0.00628695	0.0415498	0.0281607	NOX4/G6PD/MAPK3/HAMP	4
BP	GO:1901617	organic hydroxy compound biosynthetic process	5/82	266/18670	0.00632646	0.041618	0.0282069	G6PD/ALOX12/PRKAA2/SLC7A11/AKR1C3	5
BP	GO:0050900	leukocyte migration	7/82	499/18670	0.00632677	0.041618	0.0282069	MAPK3/SLC7A11/SRC/CAV1/DUSP1/SLC7A5/IL6	7
BP	GO:0072331	signal transduction by p53 class mediator	5/82	267/18670	0.00642541	0.0421093	0.0285399	PRKAA2/PML/TP63/DDIT4/AURKA	5
BP	GO:0001776	leukocyte homeostasis	3/82	86/18670	0.00643129	0.0421093	0.0285399	BAP1/SLC7A11/IL6	3
BP	GO:0097696	receptor signaling pathway via STAT	4/82	169/18670	0.00655315	0.0428078	0.0290133	HSF1/NF2/CAV1/IL6	4
BP	GO:0043470	regulation of carbohydrate catabolic process	3/82	87/18670	0.00664015	0.0429973	0.0291418	PRKAA2/DDIT4/SLC2A6	3
BP	GO:0001516	prostaglandin biosynthetic process	2/82	28/18670	0.00668881	0.0429973	0.0291418	AKR1C3/PTGS2	2
BP	GO:0009065	glutamine family amino acid catabolic process	2/82	28/18670	0.00668881	0.0429973	0.0291418	GLS2/NOS2	2
BP	GO:0033137	negative regulation of peptidyl-serine phosphorylation	2/82	28/18670	0.00668881	0.0429973	0.0291418	CAV1/DDIT4	2
BP	GO:0036296	response to increased oxygen levels	2/82	28/18670	0.00668881	0.0429973	0.0291418	NOX1/CAV1	2
BP	GO:0046457	prostanoid biosynthetic process	2/82	28/18670	0.00668881	0.0429973	0.0291418	AKR1C3/PTGS2	2
BP	GO:1902745	positive regulation of lamellipodium organization	2/82	28/18670	0.00668881	0.0429973	0.0291418	SRC/ENPP2	2
BP	GO:0034103	regulation of tissue remodeling	3/82	88/18670	0.00685301	0.0436551	0.0295875	TFRC/SRC/IL6	3
BP	GO:0061097	regulation of protein tyrosine kinase activity	3/82	88/18670	0.00685301	0.0436551	0.0295875	NOX4/SRC/CAV1	3
BP	GO:1900407	regulation of cellular response to oxidative stress	3/82	88/18670	0.00685301	0.0436551	0.0295875	NOX1/SLC7A11/HSPB1	3
BP	GO:1904035	regulation of epithelial cell apoptotic process	3/82	88/18670	0.00685301	0.0436551	0.0295875	AKR1C3/ZFP36/IL6	3
BP	GO:0097306	cellular response to alcohol	3/82	89/18670	0.0070699	0.0449258	0.0304488	PRKAA2/AKR1C2/AKR1C3	3
BP	GO:0001659	temperature homeostasis	4/82	173/18670	0.00710779	0.0449258	0.0304488	HSF1/CAV1/PTGS2/DDIT3	4
BP	GO:0000303	response to superoxide	2/82	29/18670	0.00716393	0.0449258	0.0304488	NQO1/MT3	2
BP	GO:0009435	NAD biosynthetic process	2/82	29/18670	0.00716393	0.0449258	0.0304488	PTGS2/NNMT	2
BP	GO:0015949	nucleobase-containing small molecule interconversion	2/82	29/18670	0.00716393	0.0449258	0.0304488	TXNRD1/RRM2	2
BP	GO:0033032	regulation of myeloid cell apoptotic process	2/82	29/18670	0.00716393	0.0449258	0.0304488	CDKN2A/SLC7A11	2
BP	GO:1900027	regulation of ruffle assembly	2/82	29/18670	0.00716393	0.0449258	0.0304488	HRAS/CAV1	2
BP	GO:0032970	regulation of actin filament-based process	6/82	388/18670	0.00720512	0.0450839	0.030556	NOX4/HRAS/NF2/CAV1/STMN1/CAPG	6
BP	GO:0030641	regulation of cellular pH	3/82	90/18670	0.00729083	0.0453187	0.0307151	NOX1/MAPK3/MAFG	3
BP	GO:0045185	maintenance of protein location	3/82	90/18670	0.00729083	0.0453187	0.0307151	HSPA5/PML/CAV1	3
BP	GO:0071674	mononuclear cell migration	3/82	90/18670	0.00729083	0.0453187	0.0307151	MAPK3/DUSP1/IL6	3
BP	GO:0014706	striated muscle tissue development	6/82	390/18670	0.00738132	0.0457804	0.031028	NOX4/G6PD/ATF3/TAZ/CAV1/HAMP	6
BP	GO:0051899	membrane depolarization	3/82	91/18670	0.00751582	0.0463791	0.0314337	ALOX12/SRC/CAV1	3
BP	GO:1904063	negative regulation of cation transmembrane transport	3/82	91/18670	0.00751582	0.0463791	0.0314337	CAV1/HAMP/DRD4	3
BP	GO:0051897	positive regulation of protein kinase B signaling	4/82	176/18670	0.00754358	0.0463791	0.0314337	NOX4/AKR1C2/AKR1C3/SRC	4
BP	GO:0090316	positive regulation of intracellular protein transport	4/82	176/18670	0.00754358	0.0463791	0.0314337	HRAS/BAP1/TP63/PTGS2	4
BP	GO:0000305	response to oxygen radical	2/82	30/18670	0.0076539	0.0466508	0.0316179	NQO1/MT3	2
BP	GO:0048384	retinoic acid receptor signaling pathway	2/82	30/18670	0.0076539	0.0466508	0.0316179	AKR1C3/PML	2
BP	GO:0097421	liver regeneration	2/82	30/18670	0.0076539	0.0466508	0.0316179	HAMP/AURKA	2
BP	GO:1904893	negative regulation of receptor signaling pathway via STAT	2/82	30/18670	0.0076539	0.0466508	0.0316179	NF2/CAV1	2
BP	GO:0010959	regulation of metal ion transport	6/82	394/18670	0.00774307	0.0470926	0.0319173	G6PD/PML/CAV1/PTGS2/HAMP/DRD4	6
BP	GO:1903034	regulation of response to wounding	4/82	179/18670	0.00799665	0.0485302	0.0328917	DUOX1/HRAS/ALOX12/CAV1	4
BP	GO:0071466	cellular response to xenobiotic stimulus	4/82	180/18670	0.00815157	0.0487787	0.0330601	AKR1C1/HSF1/NQO1/DDIT4	4
BP	GO:1901796	regulation of signal transduction by p53 class mediator	4/82	180/18670	0.00815157	0.0487787	0.0330601	PRKAA2/PML/TP63/AURKA	4
BP	GO:0001963	synaptic transmission, dopaminergic	2/82	31/18670	0.00815859	0.0487787	0.0330601	PTGS2/DRD4	2
BP	GO:0002675	positive regulation of acute inflammatory response	2/82	31/18670	0.00815859	0.0487787	0.0330601	PTGS2/IL6	2
BP	GO:0006691	leukotriene metabolic process	2/82	31/18670	0.00815859	0.0487787	0.0330601	ALOX12/ABCC1	2
BP	GO:0007143	female meiotic nuclear division	2/82	31/18670	0.00815859	0.0487787	0.0330601	HSF1/AURKA	2
BP	GO:0070306	lens fiber cell differentiation	2/82	31/18670	0.00815859	0.0487787	0.0330601	SLC7A11/NF2	2
CC	GO:0005767	secondary lysosome	4/82	14/19717	2.69436e-07	3.95551e-05	3.1806e-05	SQSTM1/FTH1/NCF2/FTL	4
CC	GO:0043020	NADPH oxidase complex	4/82	15/19717	3.66251e-07	3.95551e-05	3.1806e-05	NOX1/NOX4/DUOX1/NCF2	4
CC	GO:0042470	melanosome	6/82	106/19717	5.26336e-06	0.000284221	0.000228541	TFRC/SLC1A5/HSPA5/SLC1A4/SLC2A1/CAPG	6
CC	GO:0048770	pigment granule	6/82	106/19717	5.26336e-06	0.000284221	0.000228541	TFRC/SLC1A5/HSPA5/SLC1A4/SLC2A1/CAPG	6
CC	GO:0005901	caveola	5/82	80/19717	2.07044e-05	0.000894432	0.000719207	MAPK3/SRC/CAV1/PTGS2/SLC2A1	5
CC	GO:0045120	pronucleus	3/82	15/19717	3.04278e-05	0.0010954	0.000880806	HSF1/SLC2A1/AURKA	3
CC	GO:0044853	plasma membrane raft	5/82	109/19717	9.15814e-05	0.00282594	0.00227232	MAPK3/SRC/CAV1/PTGS2/SLC2A1	5
CC	GO:1990204	oxidoreductase complex	5/82	114/19717	0.000113228	0.00305717	0.00245825	NOX1/NOX4/DUOX1/NCF2/RRM2	5
CC	GO:0000792	heterochromatin	4/82	76/19717	0.000283918	0.00681403	0.00547912	CDKN2A/HSF1/HELLS/PML	4
CC	GO:0005811	lipid droplet	4/82	81/19717	0.00036243	0.00782848	0.00629483	ACSL4/PLIN2/AIFM2/CAV1	4
CC	GO:0097449	astrocyte projection	2/82	12/19717	0.00109758	0.0215524	0.0173301	SLC7A11/MT3	2
MF	GO:0016651	oxidoreductase activity, acting on NAD(P)H	11/81	107/17696	1.99041e-12	6.58826e-10	4.9027e-10	NOX1/NOX4/DUOX1/MIOX/AKR1C1/AKR1C2/AKR1C3/NQO1/NOS2/NCF2/TXNRD1	11
MF	GO:0016209	antioxidant activity	8/81	86/17696	5.38062e-09	8.90492e-07	6.62665e-07	DUOX1/NQO1/PTGS2/MT3/ALB/TXNRD1/SRXN1/GPX2	8
MF	GO:0008199	ferric iron binding	4/81	11/17696	1.31177e-07	1.44732e-05	1.07703e-05	MIOX/FTH1/FTL/RRM2	4
MF	GO:0016175	superoxide-generating NADPH oxidase activity	4/81	12/17696	1.96081e-07	1.62257e-05	1.20744e-05	NOX1/NOX4/DUOX1/NCF2	4
MF	GO:0015175	neutral amino acid transmembrane transporter activity	5/81	31/17696	2.74417e-07	1.81664e-05	1.35186e-05	SLC38A1/SLC1A5/SLC7A11/SLC1A4/SLC7A5	5
MF	GO:0008514	organic anion transmembrane transporter activity	9/81	210/17696	4.89954e-07	2.70291e-05	2.01139e-05	SLC38A1/SLC1A5/ABCC1/SLC7A11/SLC1A4/SLC7A5/SLC2A1/SLC2A6/SLC2A14	9
MF	GO:0050664	oxidoreductase activity, acting on NAD(P)H, oxygen as acceptor	4/81	17/17696	9.26489e-07	4.38097e-05	3.26013e-05	NOX1/NOX4/DUOX1/NCF2	4
MF	GO:0015179	L-amino acid transmembrane transporter activity	5/81	54/17696	4.70404e-06	0.00019463	0.000144835	SLC38A1/SLC1A5/SLC7A11/SLC1A4/SLC7A5	5
MF	GO:0004033	aldo-keto reductase (NADP) activity	4/81	26/17696	5.6402e-06	0.00019501	0.000145118	MIOX/AKR1C1/AKR1C2/AKR1C3	4
MF	GO:0005506	iron ion binding	7/81	152/17696	6.1361e-06	0.00019501	0.000145118	ALOX12/ALOX15B/EGLN2/MIOX/FTH1/FTL/RRM2	7
MF	GO:0090482	vitamin transmembrane transporter activity	4/81	27/17696	6.59811e-06	0.00019501	0.000145118	ABCC1/SLC2A1/SLC2A6/SLC2A14	4
MF	GO:0050662	coenzyme binding	9/81	291/17696	7.19414e-06	0.00019501	0.000145118	NOX1/NOX4/DUOX1/G6PD/EGLN2/AIFM2/NOS2/ALB/TXNRD1	9
MF	GO:0016701	oxidoreductase activity, acting on single donors with incorporation of molecular oxygen	4/81	28/17696	7.67105e-06	0.00019501	0.000145118	ALOX12/ALOX15B/MIOX/PTGS2	4
MF	GO:0016705	oxidoreductase activity, acting on paired donors, with incorporation or reduction of molecular oxygen	7/81	159/17696	8.24814e-06	0.00019501	0.000145118	EGLN2/AKR1C1/AKR1C2/AKR1C3/FADS2/PTGS2/NOS2	7
MF	GO:0009055	electron transfer activity	6/81	114/17696	1.37162e-05	0.000302672	0.000225235	NOX4/NQO1/AIFM2/NCF2/TXNRD1/GPX2	6
MF	GO:0015171	amino acid transmembrane transporter activity	5/81	72/17696	1.95147e-05	0.00040371	0.000300423	SLC38A1/SLC1A5/SLC7A11/SLC1A4/SLC7A5	5
MF	GO:0008509	anion transmembrane transporter activity	9/81	336/17696	2.26138e-05	0.000440305	0.000327656	SLC38A1/SLC1A5/ABCC1/SLC7A11/SLC1A4/SLC7A5/SLC2A1/SLC2A6/SLC2A14	9
MF	GO:0004032	alditol:NADP+ 1-oxidoreductase activity	3/81	13/17696	2.55649e-05	0.000470111	0.000349836	AKR1C1/AKR1C2/AKR1C3	3
MF	GO:0016709	oxidoreductase activity, acting on paired donors, with incorporation or reduction of molecular oxygen, NAD(P)H as one donor, and incorporation of one atom of oxygen	4/81	39/17696	2.96591e-05	0.000516693	0.000384501	AKR1C1/AKR1C2/AKR1C3/NOS2	4
MF	GO:0072349	modified amino acid transmembrane transporter activity	3/81	15/17696	4.04035e-05	0.000668677	0.000497601	ABCC1/SLC7A11/SLC1A4	3
MF	GO:0016722	oxidoreductase activity, oxidizing metal ions	3/81	19/17696	8.49164e-05	0.00133844	0.000996012	FTH1/FTL/STEAP3	3
MF	GO:0050661	NADP binding	4/81	52/17696	9.33116e-05	0.00137327	0.00102193	NOX1/DUOX1/G6PD/NOS2	4
MF	GO:0005355	glucose transmembrane transporter activity	3/81	20/17696	9.95723e-05	0.00137327	0.00102193	SLC2A1/SLC2A6/SLC2A14	3
MF	GO:0015149	hexose transmembrane transporter activity	3/81	20/17696	9.95723e-05	0.00137327	0.00102193	SLC2A1/SLC2A6/SLC2A14	3
MF	GO:0008106	alcohol dehydrogenase (NADP+) activity	3/81	21/17696	0.000115785	0.00153299	0.00114078	AKR1C1/AKR1C2/AKR1C3	3
MF	GO:0015145	monosaccharide transmembrane transporter activity	3/81	22/17696	0.000133625	0.00170114	0.00126592	SLC2A1/SLC2A6/SLC2A14	3
MF	GO:0016655	oxidoreductase activity, acting on NAD(P)H, quinone or similar compound as acceptor	4/81	60/17696	0.000163474	0.00199131	0.00148185	AKR1C1/AKR1C2/AKR1C3/NQO1	4
MF	GO:0008198	ferrous iron binding	3/81	24/17696	0.000174466	0.00199131	0.00148185	EGLN2/FTH1/FTL	3
MF	GO:0051119	sugar transmembrane transporter activity	3/81	24/17696	0.000174466	0.00199131	0.00148185	SLC2A1/SLC2A6/SLC2A14	3
MF	GO:0016616	oxidoreductase activity, acting on the CH-OH group of donors, NAD or NADP as acceptor	5/81	119/17696	0.000215411	0.0023767	0.00176864	G6PD/MIOX/AKR1C1/AKR1C2/AKR1C3	5
MF	GO:0016628	oxidoreductase activity, acting on the CH-CH group of donors, NAD or NADP as acceptor	3/81	26/17696	0.000222642	0.00237724	0.00176904	AKR1C1/AKR1C2/AKR1C3	3
MF	GO:0016702	oxidoreductase activity, acting on single donors with incorporation of molecular oxygen, incorporation of two atoms of oxygen	3/81	27/17696	0.000249647	0.00258229	0.00192163	ALOX12/ALOX15B/PTGS2	3
MF	GO:0016614	oxidoreductase activity, acting on CH-OH group of donors	5/81	128/17696	0.0003022	0.00303115	0.00225565	G6PD/MIOX/AKR1C1/AKR1C2/AKR1C3	5
MF	GO:0020037	heme binding	5/81	135/17696	0.000386272	0.00376048	0.00279838	NOX4/DUOX1/SRC/PTGS2/NOS2	5
MF	GO:0050660	flavin adenine dinucleotide binding	4/81	79/17696	0.000471607	0.00446005	0.00331898	NOX4/AIFM2/NOS2/TXNRD1	4
MF	GO:0046906	tetrapyrrole binding	5/81	145/17696	0.000535654	0.0047392	0.00352671	NOX4/DUOX1/SRC/PTGS2/NOS2	5
MF	GO:0016229	steroid dehydrogenase activity	3/81	35/17696	0.000544078	0.0047392	0.00352671	AKR1C1/AKR1C2/AKR1C3	3
MF	GO:1901682	sulfur compound transmembrane transporter activity	3/81	35/17696	0.000544078	0.0047392	0.00352671	ABCC1/SLC7A11/SLC1A4	3
MF	GO:0019825	oxygen binding	3/81	36/17696	0.000591588	0.00502091	0.00373635	NOX4/EGLN2/ALB	3
MF	GO:0015144	carbohydrate transmembrane transporter activity	3/81	37/17696	0.000641671	0.00530983	0.00395134	SLC2A1/SLC2A6/SLC2A14	3
MF	GO:0005342	organic acid transmembrane transporter activity	5/81	153/17696	0.000683517	0.00538676	0.0040086	SLC38A1/SLC1A5/SLC7A11/SLC1A4/SLC7A5	5
MF	GO:0046943	carboxylic acid transmembrane transporter activity	5/81	153/17696	0.000683517	0.00538676	0.0040086	SLC38A1/SLC1A5/SLC7A11/SLC1A4/SLC7A5	5
MF	GO:0051213	dioxygenase activity	4/81	91/17696	0.000804797	0.00619507	0.0046101	ALOX12/ALOX15B/EGLN2/PTGS2	4
MF	GO:0004322	ferroxidase activity	2/81	10/17696	0.00090932	0.00668856	0.00497733	FTH1/FTL	2
MF	GO:0016724	oxidoreductase activity, oxidizing metal ions, oxygen as acceptor	2/81	10/17696	0.00090932	0.00668856	0.00497733	FTH1/FTL	2
MF	GO:0004712	protein serine/threonine/tyrosine kinase activity	3/81	43/17696	0.000999237	0.00719016	0.0053506	MAPK3/PRKAA2/AURKA	3
MF	GO:0004497	monooxygenase activity	4/81	99/17696	0.00110263	0.00776535	0.00577864	AKR1C1/AKR1C2/AKR1C3/NOS2	4
MF	GO:0016653	oxidoreductase activity, acting on NAD(P)H, heme protein as acceptor	2/81	13/17696	0.00156216	0.0107724	0.00801637	NQO1/NOS2	2
MF	GO:0004601	peroxidase activity	3/81	52/17696	0.00173727	0.0117355	0.00873302	DUOX1/PTGS2/GPX2	3
MF	GO:0005080	protein kinase C binding	3/81	53/17696	0.00183548	0.0121509	0.00904213	HSPB1/SQSTM1/SRC	3
MF	GO:0031406	carboxylic acid binding	5/81	193/17696	0.00192052	0.0124646	0.00927558	EGLN2/AKR1C1/AKR1C2/NOS2/ALB	5
MF	GO:0016684	oxidoreductase activity, acting on peroxide as acceptor	3/81	56/17696	0.00215065	0.0135579	0.0100892	DUOX1/PTGS2/GPX2	3
MF	GO:0031072	heat shock protein binding	4/81	119/17696	0.0021709	0.0135579	0.0100892	DNAJB6/HSF1/HSPA5/ZFP36	4
MF	GO:0016627	oxidoreductase activity, acting on the CH-CH group of donors	3/81	58/17696	0.0023783	0.0145781	0.0108484	AKR1C1/AKR1C2/AKR1C3	3
MF	GO:0043177	organic acid binding	5/81	205/17696	0.00249621	0.0150226	0.0111792	EGLN2/AKR1C1/AKR1C2/NOS2/ALB	5
MF	GO:0035173	histone kinase activity	2/81	17/17696	0.00269162	0.0159094	0.0118391	PRKAA2/AURKA	2
MF	GO:0033293	monocarboxylic acid binding	3/81	64/17696	0.00314882	0.0182853	0.0136071	AKR1C1/AKR1C2/ALB	3
MF	GO:0048365	Rac GTPase binding	3/81	69/17696	0.00389547	0.0222311	0.0165434	NOX1/CAV1/NCF2	3
MF	GO:0015293	symporter activity	4/81	144/17696	0.00430946	0.0241768	0.0179913	SLC38A1/SLC1A5/SLC1A4/SLC2A6	4
MF	GO:0015291	secondary active transmembrane transporter activity	5/81	237/17696	0.00463459	0.0255675	0.0190262	SLC38A1/SLC1A5/SLC7A11/SLC1A4/SLC2A6	5
MF	GO:0044183	protein folding chaperone	2/81	23/17696	0.00491896	0.0266914	0.0198626	HSPB1/HSPA5	2
MF	GO:0022804	active transmembrane transporter activity	6/81	349/17696	0.0052903	0.0282434	0.0210175	SLC38A1/SLC1A5/ABCC1/SLC7A11/SLC1A4/SLC2A6	6
MF	GO:0033764	steroid dehydrogenase activity, acting on the CH-OH group of donors, NAD or NADP as acceptor	2/81	29/17696	0.00775483	0.040107	0.0298459	AKR1C1/AKR1C3	2
MF	GO:0071889	14-3-3 protein binding	2/81	29/17696	0.00775483	0.040107	0.0298459	ZFP36/DDIT4	2
MF	GO:0030291	protein serine/threonine kinase inhibitor activity	2/81	32/17696	0.00939033	0.0478184	0.0355844	CDKN2A/HSPB1	2
MF	GO:0032182	ubiquitin-like protein binding	3/81	96/17696	0.00972706	0.0487827	0.0363019	HSPB1/SQSTM1/PML	3
KEGG pathways
KEGG	hsa05230	Central carbon metabolism in cancer	8/68	70/8102	1.00898e-07	2.1794e-05	1.48692e-05	G6PD/NRAS/HRAS/SLC1A5/GLS2/MAPK3/SLC7A5/SLC2A1	8
KEGG	hsa04216	Ferroptosis	6/68	41/8102	9.96841e-07	0.000107659	7.34515e-05	ACSL4/TFRC/SLC7A11/FTH1/FTL/STEAP3	6
KEGG	hsa04370	VEGF signaling pathway	6/68	59/8102	8.8741e-06	0.000638935	0.000435921	NRAS/HRAS/MAPK3/HSPB1/SRC/PTGS2	6
KEGG	hsa05418	Fluid shear stress and atherosclerosis	8/68	139/8102	1.90484e-05	0.000919263	0.000627178	NOX1/PRKAA2/SQSTM1/NQO1/SRC/CAV1/DUSP1/NCF2	8
KEGG	hsa05219	Bladder cancer	5/68	41/8102	2.12792e-05	0.000919263	0.000627178	NRAS/HRAS/MAPK3/CDKN2A/SRC	5
KEGG	hsa04726	Serotonergic synapse	7/68	115/8102	4.58439e-05	0.00165038	0.00112599	NRAS/HRAS/ALOX12/ALOX15B/MAPK3/PTGS2/DUSP1	7
KEGG	hsa00590	Arachidonic acid metabolism	5/68	61/8102	0.000148397	0.0045791	0.00312414	ALOX12/ALOX15B/AKR1C3/PTGS2/GPX2	5
KEGG	hsa04933	AGE-RAGE signaling pathway in diabetic complications	6/68	100/8102	0.000179356	0.00484262	0.00330393	NOX1/NOX4/NRAS/HRAS/MAPK3/IL6	6
KEGG	hsa04625	C-type lectin receptor signaling pathway	6/68	104/8102	0.000222392	0.00508209	0.00346731	NRAS/HRAS/MAPK3/SRC/PTGS2/IL6	6
KEGG	hsa05206	MicroRNAs in cancer	10/68	310/8102	0.000235282	0.00508209	0.00346731	NRAS/HRAS/GLS2/MAPK3/CDKN2A/ABCC1/TP63/PTGS2/DDIT4/STMN1	10
KEGG	hsa05211	Renal cell carcinoma	5/68	69/8102	0.000266195	0.00516995	0.00352726	NRAS/HRAS/MAPK3/EGLN2/SLC2A1	5
KEGG	hsa04066	HIF-1 signaling pathway	6/68	109/8102	0.00028722	0.00516995	0.00352726	TFRC/MAPK3/EGLN2/NOS2/IL6/SLC2A1	6
KEGG	hsa01521	EGFR tyrosine kinase inhibitor resistance	5/68	79/8102	0.000500409	0.00795188	0.00542526	NRAS/HRAS/MAPK3/SRC/IL6	5
KEGG	hsa05022	Pathways of neurodegeneration - multiple diseases	12/68	475/8102	0.0005154	0.00795188	0.00542526	NOX1/NOX4/NRAS/HRAS/MAPK3/SQSTM1/HSPA5/PTGS2/NOS2/GPX2/DDIT3/IL6	12
KEGG	hsa04140	Autophagy - animal	6/68	137/8102	0.000970286	0.0139721	0.00953263	NRAS/HRAS/MAPK3/PRKAA2/SQSTM1/DDIT4	6
KEGG	hsa05167	Kaposi sarcoma-associated herpesvirus infection	7/68	193/8102	0.00110799	0.0149578	0.0102051	NRAS/HRAS/MAPK3/SRC/ZFP36/PTGS2/IL6	7
KEGG	hsa01522	Endocrine resistance	5/68	98/8102	0.00133384	0.0169477	0.0115627	NRAS/HRAS/MAPK3/CDKN2A/SRC	5
KEGG	hsa04921	Oxytocin signaling pathway	6/68	154/8102	0.00177329	0.0204504	0.0139525	NRAS/HRAS/MAPK3/PRKAA2/SRC/PTGS2	6
KEGG	hsa04150	mTOR signaling pathway	6/68	155/8102	0.00183267	0.0204504	0.0139525	NRAS/HRAS/MAPK3/PRKAA2/DDIT4/SLC7A5	6
KEGG	hsa04218	Cellular senescence	6/68	156/8102	0.00189356	0.0204504	0.0139525	NRAS/HRAS/MAPK3/CDKN2A/SQSTM1/IL6	6
KEGG	hsa01523	Antifolate resistance	3/68	31/8102	0.00214849	0.021959	0.0149818	ALOX12/ABCC1/IL6	3
KEGG	hsa05166	Human T-cell leukemia virus 1 infection	7/68	219/8102	0.00229073	0.021959	0.0149818	NRAS/HRAS/MAPK3/CDKN2A/ZFP36/IL6/SLC2A1	7
KEGG	hsa05221	Acute myeloid leukemia	4/68	67/8102	0.00233823	0.021959	0.0149818	NRAS/HRAS/MAPK3/PML	4
KEGG	hsa04137	Mitophagy - animal	4/68	68/8102	0.00246884	0.0220023	0.0150113	NRAS/HRAS/SQSTM1/SRC	4
KEGG	hsa05163	Human cytomegalovirus infection	7/68	225/8102	0.00266742	0.0220023	0.0150113	NRAS/HRAS/MAPK3/CDKN2A/SRC/PTGS2/IL6	7
KEGG	hsa04917	Prolactin signaling pathway	4/68	70/8102	0.00274496	0.0220023	0.0150113	NRAS/HRAS/MAPK3/SRC	4
KEGG	hsa05225	Hepatocellular carcinoma	6/68	168/8102	0.00275029	0.0220023	0.0150113	NRAS/HRAS/MAPK3/CDKN2A/NQO1/TXNRD1	6
KEGG	hsa05218	Melanoma	4/68	72/8102	0.00304159	0.0221122	0.0150863	NRAS/HRAS/MAPK3/CDKN2A	4
KEGG	hsa05223	Non-small cell lung cancer	4/68	72/8102	0.00304159	0.0221122	0.0150863	NRAS/HRAS/MAPK3/CDKN2A	4
KEGG	hsa04115	p53 signaling pathway	4/68	73/8102	0.00319781	0.0221122	0.0150863	CDKN2A/AIFM2/STEAP3/RRM2	4
KEGG	hsa04919	Thyroid hormone signaling pathway	5/68	121/8102	0.00336711	0.0221122	0.0150863	NRAS/HRAS/MAPK3/SRC/SLC2A1	5
KEGG	hsa05010	Alzheimer disease	9/68	369/8102	0.00348603	0.0221122	0.0150863	NOX1/NOX4/NRAS/HRAS/MAPK3/PTGS2/NOS2/DDIT3/IL6	9
KEGG	hsa04918	Thyroid hormone synthesis	4/68	75/8102	0.00352654	0.0221122	0.0150863	DUOX1/HSPA5/ALB/GPX2	4
KEGG	hsa05214	Glioma	4/68	75/8102	0.00352654	0.0221122	0.0150863	NRAS/HRAS/MAPK3/CDKN2A	4
KEGG	hsa05216	Thyroid cancer	3/68	37/8102	0.00358299	0.0221122	0.0150863	NRAS/HRAS/MAPK3	3
KEGG	hsa05220	Chronic myeloid leukemia	4/68	76/8102	0.00369923	0.0221954	0.015143	NRAS/HRAS/MAPK3/CDKN2A	4
KEGG	hsa05140	Leishmaniasis	4/68	77/8102	0.00387757	0.0226366	0.0154441	MAPK3/PTGS2/NOS2/NCF2	4
KEGG	hsa04926	Relaxin signaling pathway	5/68	129/8102	0.00442826	0.0251712	0.0171733	NRAS/HRAS/MAPK3/SRC/NOS2	5
KEGG	hsa04068	FoxO signaling pathway	5/68	131/8102	0.00472704	0.0261805	0.0178619	NRAS/HRAS/MAPK3/PRKAA2/IL6	5
KEGG	hsa04012	ErbB signaling pathway	4/68	85/8102	0.00551852	0.0298	0.0203314	NRAS/HRAS/MAPK3/SRC	4
KEGG	hsa04371	Apelin signaling pathway	5/68	137/8102	0.00570946	0.0300791	0.0205218	NRAS/HRAS/MAPK3/PRKAA2/NOS2	5
KEGG	hsa04540	Gap junction	4/68	88/8102	0.00623752	0.0320787	0.021886	NRAS/HRAS/MAPK3/SRC	4
KEGG	hsa04912	GnRH signaling pathway	4/68	93/8102	0.00756995	0.0380258	0.0259435	NRAS/HRAS/MAPK3/SRC	4
