# Supplementary material for: Development and validation of ferroptosis-related lncRNAs signature for hepatocellular carcinoma
Source: PeerJ. 2021 Jun 11;9:e11627. doi: 10.7717/peerj.11627 (PMC8202323; doi:10.7717/peerj.11627)
Supplement: Supplemental Information 6 [file peerj-09-11627-s006.xlsx]

## Sheet: Sheet1
Ferroptosis-related gene	LncRNA	Cor	P value
SLC38A1	LBX2-AS1	-0.318142	3.04827e-10
BAP1	LBX2-AS1	0.369547	1.51489e-13
CS	SNHG14	0.409125	1.59122e-16
ACSL4	SNHG14	0.303194	2.15953e-09
NRAS	SNHG14	0.327566	8.379e-11
SLC38A1	SNHG14	0.349642	3.40232e-12
FANCD2	SNHG14	0.315877	4.12985e-10
SRC	SNHG14	0.464191	2.20073e-21
ZFP69B	SNHG14	0.334203	3.28421e-11
PTGS2	AL158206.1	0.485384	1.67674e-23
CS	AP003486.1	0.402616	5.2414e-16
DUOX1	AP003486.1	0.316086	4.01631e-10
SLC38A1	AP003486.1	0.322939	1.58843e-10
ALOX12	AP003486.1	0.412432	8.59653e-17
ABCC1	AP003486.1	0.381387	2.14295e-14
PML	AP003486.1	0.337101	2.16645e-11
NF2	AP003486.1	0.31582	4.16159e-10
MAPK3	AC064836.3	0.335784	2.61891e-11
CAV1	AC064836.3	0.301458	2.69187e-09
ZNF419	AC064836.3	0.364214	3.56204e-13
STMN1	AC064836.3	0.326086	1.02934e-10
NOX4	Z82249.1	0.499823	4.94965e-25
AKR1C1	LINC02055	0.306591	1.39724e-09
HSF1	LINC02055	0.320227	2.29935e-10
TXNRD1	LINC02055	0.303411	2.10058e-09
MAFG	LINC02055	0.330774	5.34316e-11
NRAS	ASB16-AS1	0.328563	7.2898e-11
ALOX12	ASB16-AS1	0.380705	2.4037e-14
MAPK3	ASB16-AS1	0.343674	8.29601e-12
MYB	ASB16-AS1	0.304203	1.89862e-09
YY1AP1	ASB16-AS1	0.416965	3.65542e-17
FANCD2	ASB16-AS1	0.424931	7.87924e-18
HELLS	ASB16-AS1	0.374193	7.09898e-14
ZNF419	ASB16-AS1	0.319289	2.611e-10
STMN1	ASB16-AS1	0.378251	3.62546e-14
HRAS	AC010883.1	0.339046	1.63464e-11
HELLS	AL035587.1	0.458745	7.30316e-21
PRKAA2	ZNF503-AS2	0.409293	1.54231e-16
AIFM2	ZNF503-AS2	0.395365	1.9188e-15
SLC1A4	ZNF503-AS2	0.370983	1.19996e-13
HRAS	AP000240.1	0.364811	3.23954e-13
EGLN2	AP000240.1	0.451219	3.69958e-20
NF2	AP000240.1	0.317805	3.18936e-10
ZNF419	AP000240.1	0.342019	1.05862e-11
HRAS	AL445524.1	0.31485	4.73578e-10
HSPB1	AL445524.1	0.332758	4.03466e-11
GPX2	AL445524.1	0.344276	7.5887e-12
FTL	AL445524.1	0.343495	8.51792e-12
CS	SCAMP1-AS1	0.303586	2.05425e-09
ALOX12	SCAMP1-AS1	0.344838	6.98283e-12
RPL8	AC027644.3	0.455001	1.64507e-20
HRAS	AC027644.3	0.624643	7.35548e-42
EGLN2	AC027644.3	0.606801	5.47282e-39
HSPB1	AC027644.3	0.566353	4.14719e-33
FTL	AC027644.3	0.356646	1.16673e-12
FADS2	AC114947.2	0.339132	1.61436e-11
SLC38A1	AP006284.1	0.31665	3.72432e-10
NF2	AP006284.1	0.311368	7.50354e-10
SLC7A5	AP006284.1	0.365898	2.72382e-13
DRD4	AP006284.1	0.814925	3.79414e-90
SLC2A6	AP006284.1	0.373741	7.64713e-14
G6PD	LINC00189	0.339443	1.54279e-11
NRAS	LINC00189	0.327638	8.29463e-11
AKR1C1	LINC00189	0.387178	7.99688e-15
AKR1C3	LINC00189	0.370332	1.33387e-13
TXNRD1	LINC00189	0.366302	2.5534e-13
SRXN1	LINC00189	0.30351	2.07418e-09
HELLS	AC087481.3	0.301638	2.6313e-09
RPL8	AC156455.1	0.366631	2.42241e-13
EGLN2	AC156455.1	0.362122	4.96042e-13
HSF1	AC156455.1	0.33963	1.50149e-11
SLC2A14	AC156455.1	0.55609	9.63765e-32
ZNF419	ZNF582-AS1	0.5406	9.09088e-30
TFRC	LOXL1-AS1	0.363256	4.14665e-13
SLC1A5	LOXL1-AS1	0.654852	3.60497e-47
DNAJB6	LOXL1-AS1	0.328139	7.73516e-11
PML	LOXL1-AS1	0.554569	1.52208e-31
NF2	LOXL1-AS1	0.465664	1.5851e-21
CAV1	LOXL1-AS1	0.516526	6.78683e-27
ASNS	LOXL1-AS1	0.413282	7.32945e-17
SLC7A5	LOXL1-AS1	0.383311	1.54788e-14
SLC2A1	LOXL1-AS1	0.338375	1.8017e-11
EMC2	AP003469.2	0.388391	6.48788e-15
G6PD	AP003469.2	0.435156	1.03478e-18
NRAS	AP003469.2	0.304963	1.72263e-09
SLC38A1	AP003469.2	0.350607	2.94053e-12
AKR1C3	AP003469.2	0.353027	2.03513e-12
HSF1	AP003469.2	0.324768	1.23524e-10
SQSTM1	AP003469.2	0.375448	5.77291e-14
FTH1	AP003469.2	0.319203	2.64143e-10
FANCD2	AP003469.2	0.308635	1.07232e-09
TXNRD1	AP003469.2	0.391006	4.12316e-15
SRXN1	AP003469.2	0.364462	3.42448e-13
ASNS	AP003469.2	0.36595	2.70134e-13
MAFG	AP003469.2	0.442066	2.52253e-19
ABCC1	LINC01447	0.351523	2.55916e-12
RPL8	AC015982.1	0.418142	2.92126e-17
HRAS	AC015982.1	0.385285	1.10612e-14
EGLN2	AC015982.1	0.424831	8.03466e-18
GLS2	DRAIC	0.347206	4.90694e-12
ALOX15B	DRAIC	0.308482	1.09386e-09
AKR1C1	OSER1-DT	0.368176	1.89024e-13
AKR1C2	OSER1-DT	0.334426	3.18121e-11
CS	FGD5-AS1	0.440146	3.74654e-19
NRAS	FGD5-AS1	0.563671	9.53714e-33
TFRC	FGD5-AS1	0.339907	1.44202e-11
ALOX12	FGD5-AS1	0.421816	1.44267e-17
PRKAA2	FGD5-AS1	0.301568	2.65458e-09
BAP1	FGD5-AS1	0.354273	1.68159e-12
YY1AP1	FGD5-AS1	0.41814	2.92238e-17
FANCD2	FGD5-AS1	0.48686	1.17861e-23
HELLS	FGD5-AS1	0.411281	1.06594e-16
SRC	FGD5-AS1	0.341251	1.1849e-11
PML	FGD5-AS1	0.307008	1.32405e-09
ZFP69B	FGD5-AS1	0.452742	2.67234e-20
MAFG	FGD5-AS1	0.338106	1.87344e-11
NNMT	FGD5-AS1	-0.361748	5.26129e-13
RPL8	AP003068.1	0.534896	4.57374e-29
HRAS	AP003068.1	0.597662	1.38025e-37
EGLN2	AP003068.1	0.39207	3.42434e-15
AKR1C1	AP003068.1	0.301796	2.57895e-09
HSPB1	AP003068.1	0.647269	8.83766e-46
HSF1	AP003068.1	0.303235	2.1482e-09
NQO1	AP003068.1	0.311876	7.01861e-10
GPX2	AP003068.1	0.31737	3.38149e-10
FTL	AP003068.1	0.339141	1.61219e-11
RPL8	AC016405.2	0.381245	2.19502e-14
HSF1	AC016405.2	0.328317	7.54486e-11
ASNS	AC016405.2	0.356283	1.23415e-12
CS	AC073569.2	0.388883	5.95964e-15
NRAS	AC073569.2	0.376848	4.57846e-14
SLC38A1	AC073569.2	0.362063	5.00709e-13
ALOX12	AC073569.2	0.39371	2.5687e-15
ABCC1	AC073569.2	0.362452	4.70864e-13
HRAS	LINC00513	0.305365	1.63602e-09
HSF1	LINC00513	0.321895	1.83233e-10
CS	AC099850.3	0.380001	2.70571e-14
NOX1	AC099850.3	0.306813	1.35782e-09
G6PD	AC099850.3	0.443385	1.91997e-19
NRAS	AC099850.3	0.614292	3.58813e-40
TFRC	AC099850.3	0.462263	3.37302e-21
SLC38A1	AC099850.3	0.395746	1.79369e-15
SLC1A5	AC099850.3	0.524829	7.35523e-28
MAPK3	AC099850.3	0.43337	1.48247e-18
CDKN2A	AC099850.3	0.45038	4.42178e-20
MYB	AC099850.3	0.497484	8.86005e-25
ABCC1	AC099850.3	0.435469	9.71324e-19
YY1AP1	AC099850.3	0.447824	7.59139e-20
DNAJB6	AC099850.3	0.417557	3.26592e-17
FANCD2	AC099850.3	0.731687	6.82061e-64
HELLS	AC099850.3	0.638852	2.7739e-44
PML	AC099850.3	0.446323	1.04047e-19
NF2	AC099850.3	0.419735	2.1538e-17
CAV1	AC099850.3	0.377637	4.01586e-14
ASNS	AC099850.3	0.376815	4.60371e-14
SLC1A4	AC099850.3	0.360098	6.81782e-13
ZFP69B	AC099850.3	0.578203	9.53965e-35
MAFG	AC099850.3	0.440838	3.24932e-19
SLC2A1	AC099850.3	0.414625	5.69255e-17
STMN1	AC099850.3	0.644019	3.38715e-45
RRM2	AC099850.3	0.719512	7.17371e-61
CAPG	AC099850.3	0.316845	3.62853e-10
AURKA	AC099850.3	0.513757	1.40462e-26
GPX2	AC090912.1	0.349419	3.5189e-12
FTL	AC090912.1	0.303615	2.04661e-09
RPL8	ELF3-AS1	0.378824	3.2948e-14
HRAS	ELF3-AS1	0.397961	1.21005e-15
EGLN2	ELF3-AS1	0.406178	2.73865e-16
HSPB1	ELF3-AS1	0.378963	3.21906e-14
GPX2	ELF3-AS1	0.368575	1.77241e-13
DDIT3	ELF3-AS1	0.336687	2.29979e-11
FTL	ELF3-AS1	0.339769	1.47127e-11
SLC38A1	VIM-AS1	0.38007	2.67432e-14
ALOX12	VIM-AS1	0.344702	7.12462e-12
ABCC1	VIM-AS1	0.612402	7.18484e-40
DNAJB6	VIM-AS1	0.337704	1.9858e-11
SRC	VIM-AS1	0.332783	4.02045e-11
PML	VIM-AS1	0.342301	1.01573e-11
CAV1	VIM-AS1	0.42622	6.12305e-18
ZFP69B	VIM-AS1	0.319092	2.6815e-10
G6PD	LINC00839	0.302273	2.42778e-09
SLC1A5	LINC00839	0.517133	5.78109e-27
CDKN2A	LINC00839	0.308671	1.06733e-09
ABCC1	LINC00839	0.311477	7.39665e-10
FANCD2	LINC00839	0.339444	1.54266e-11
PML	LINC00839	0.528622	2.61128e-28
NF2	LINC00839	0.324948	1.20481e-10
CAV1	LINC00839	0.502762	2.36708e-25
ZFP69B	LINC00839	0.344956	6.8617e-12
SLC2A1	LINC00839	0.356027	1.28394e-12
CS	AC007388.1	0.348724	3.90727e-12
SLC38A1	AC007388.1	0.380288	2.57851e-14
ALOX12	AC007388.1	0.327302	8.69304e-11
ABCC1	AC007388.1	0.32261	1.66158e-10
DUOX1	LINC00322	0.371069	1.18329e-13
SLC1A5	AC022784.1	0.301678	2.61778e-09
ZNF419	AC022784.1	0.445536	1.22664e-19
HRAS	LINC00685	0.30263	2.32006e-09
MAPK3	LINC00685	0.320649	2.17134e-10
CDKN2A	LINC00685	0.316942	3.58163e-10
EGLN2	LINC00685	0.380341	2.55527e-14
TAZ	LINC00685	0.308865	1.04074e-09
NF2	LINC00685	0.357628	1.0021e-12
SLC2A6	LINC00685	0.328507	7.34699e-11
STMN1	LINC00685	0.360055	6.86358e-13
TAZ	AC006372.1	0.416098	4.30893e-17
NRAS	LINC00667	0.332778	4.02346e-11
FANCD2	LINC00667	0.316582	3.75823e-10
HELLS	LINC00667	0.384992	1.16279e-14
ZNF419	LINC00667	0.321058	2.05382e-10
GLS2	AC020978.4	0.603542	1.75096e-38
HELLS	AC020978.4	0.379346	3.01966e-14
RPL8	AC008035.1	0.438613	5.12792e-19
AKR1C2	AC010894.2	0.316786	3.65721e-10
HRAS	AC132872.1	0.322186	1.76096e-10
MAPK3	AC132872.1	0.312812	6.20417e-10
ZNF419	AC132872.1	0.323209	1.5307e-10
G6PD	AC093673.1	0.302321	2.41297e-09
HRAS	AC093673.1	0.455953	1.3393e-20
SLC1A5	AC093673.1	0.303461	2.08722e-09
MAPK3	AC093673.1	0.306949	1.33415e-09
CDKN2A	AC093673.1	0.338764	1.70299e-11
EGLN2	AC093673.1	0.425329	7.29062e-18
HSPB1	AC093673.1	0.379061	3.16685e-14
ASNS	AC093673.1	0.312308	6.63104e-10
CAPG	AC093673.1	0.330343	5.67769e-11
ABCC1	AP000785.2	0.338178	1.85392e-11
NOX1	LINC01133	0.515723	8.38634e-27
MYB	LINC01133	0.309758	9.26492e-10
ABCC1	LINC01133	0.314129	5.21221e-10
PML	LINC01133	0.392904	2.95916e-15
PTGS2	LINC01133	0.560502	2.52624e-32
CAPG	LINC01133	0.37985	2.77501e-14
PML	HOXB-AS1	0.320177	2.31503e-10
CAV1	HOXB-AS1	0.474545	2.1195e-22
G6PD	PIK3CD-AS2	0.402927	4.95431e-16
FANCD2	PIK3CD-AS2	0.35023	3.11341e-12
ASNS	PIK3CD-AS2	0.356404	1.21124e-12
STMN1	PIK3CD-AS2	0.367241	2.19681e-13
RRM2	PIK3CD-AS2	0.320334	2.26632e-10
DUOX1	PSMA3-AS1	0.372045	1.00941e-13
ALOX12	PSMA3-AS1	0.366844	2.34139e-13
YY1AP1	PSMA3-AS1	0.393799	2.52861e-15
FANCD2	PSMA3-AS1	0.380181	2.625e-14
HELLS	PSMA3-AS1	0.427443	4.81613e-18
ZNF419	PSMA3-AS1	0.445946	1.12589e-19
FTL	PSMA3-AS1	-0.306184	1.47249e-09
MYB	AL139246.3	0.35958	7.39303e-13
ALOX15B	SPATA41	0.451976	3.14805e-20
TUBE1	AL360181.1	0.385266	1.10968e-14
DUOX1	AC078909.2	0.385538	1.05921e-14
HRAS	AC078909.2	0.337654	2.00007e-11
SLC38A1	AC078909.2	0.341397	1.15982e-11
ABCC1	AC078909.2	0.314637	4.87173e-10
TAZ	AC078909.2	0.332954	3.92372e-11
NF2	AC078909.2	0.357507	1.02105e-12
DRD4	AC078909.2	0.545858	1.99412e-30
SLC2A6	AC078909.2	0.37274	9.00931e-14
G6PD	LUCAT1	0.400536	7.63016e-16
SLC7A11	LUCAT1	0.310619	8.27859e-10
AKR1C1	LUCAT1	0.66671	2.0045e-49
AKR1C2	LUCAT1	0.505284	1.24965e-25
AKR1C3	LUCAT1	0.545992	1.91789e-30
SQSTM1	LUCAT1	0.525517	6.10118e-28
NQO1	LUCAT1	0.445542	1.2253e-19
FTH1	LUCAT1	0.358641	8.55993e-13
TXNRD1	LUCAT1	0.657661	1.07621e-47
SRXN1	LUCAT1	0.622587	1.61067e-41
GPX2	LUCAT1	0.376313	5.00343e-14
FTL	LUCAT1	0.406934	2.38356e-16
MAFG	LUCAT1	0.472969	3.04201e-22
RPL8	CASC19	0.385621	1.04434e-14
ACSL4	CASC19	0.326737	9.40327e-11
HSF1	CASC19	0.338006	1.90075e-11
SQSTM1	CASC19	0.330519	5.53875e-11
CS	EBLN3P	0.343808	8.13285e-12
NRAS	EBLN3P	0.424135	9.20185e-18
TFRC	EBLN3P	0.305309	1.64797e-09
SLC38A1	EBLN3P	0.365312	2.99112e-13
ALOX12	EBLN3P	0.464595	2.01169e-21
YY1AP1	EBLN3P	0.394646	2.17846e-15
FANCD2	EBLN3P	0.302064	2.49308e-09
ZFP69B	EBLN3P	0.328818	7.03374e-11
FTL	EBLN3P	-0.344327	7.53178e-12
RPL8	AC009275.1	0.370517	1.29435e-13
G6PD	AC009275.1	0.398474	1.10418e-15
HRAS	AC009275.1	0.523717	9.93876e-28
EGLN2	AC009275.1	0.324778	1.23344e-10
AKR1C3	AC009275.1	0.363379	4.06641e-13
HSPB1	AC009275.1	0.540351	9.76071e-30
NQO1	AC009275.1	0.35547	1.39912e-12
RPL8	AC087741.2	0.37092	1.21238e-13
G6PD	AC087741.2	0.367957	1.9579e-13
HRAS	AC087741.2	0.516297	7.20908e-27
MAPK3	AC087741.2	0.33595	2.55714e-11
EGLN2	AC087741.2	0.354229	1.69302e-12
AKR1C3	AC087741.2	0.307967	1.16954e-09
HSPB1	AC087741.2	0.450538	4.27579e-20
HSF1	AC087741.2	0.341478	1.14606e-11
STMN1	AC087741.2	0.396764	1.49739e-15
YY1AP1	AL450992.2	0.418265	2.85352e-17
TXNRD1	AL450992.2	0.348895	3.80792e-12
SRXN1	AL450992.2	0.330975	5.19373e-11
MAFG	AL450992.2	0.304383	1.85535e-09
RPL8	AC139530.1	0.326765	9.36741e-11
HRAS	AC139530.1	0.555386	1.19131e-31
MAPK3	AC139530.1	0.343106	9.02211e-12
CDKN2A	AC139530.1	0.32097	2.07869e-10
EGLN2	AC139530.1	0.434089	1.28316e-18
HSPB1	AC139530.1	0.44304	2.06213e-19
STMN1	AC139530.1	0.361762	5.24967e-13
AKR1C2	AC005722.3	0.310685	8.20706e-10
AIFM2	AC005722.3	0.35893	8.18279e-13
TXNRD1	AC005722.3	0.504852	1.39457e-25
SRXN1	AC005722.3	0.46994	6.06016e-22
MAFG	AC005722.3	0.351929	2.40608e-12
CDKN2A	AL445673.1	0.313201	5.89391e-10
HELLS	AL445673.1	0.32156	1.91798e-10
STMN1	AL445673.1	0.370256	1.35047e-13
RRM2	AL445673.1	0.360261	6.64592e-13
AURKA	AL445673.1	0.335413	2.76208e-11
SLC38A1	LINC02188	0.323993	1.37439e-10
ABCC1	LINC02188	0.310445	8.46868e-10
G6PD	LINC00887	0.33051	5.54593e-11
AKR1C3	LINC00887	0.387323	7.79991e-15
DUOX1	AL390719.2	0.428689	3.76681e-18
SLC38A1	AL390719.2	0.433903	1.33184e-18
ABCC1	AL390719.2	0.37885	3.28038e-14
SRC	AL390719.2	0.394234	2.34228e-15
NF2	AL390719.2	0.311407	7.46554e-10
CAV1	AL390719.2	0.305924	1.52265e-09
PTGS2	AL390719.2	0.383007	1.6297e-14
ZNF419	AL390719.2	0.453551	2.24718e-20
DRD4	AL390719.2	0.355383	1.418e-12
SLC2A6	AL390719.2	0.316219	3.94567e-10
RPL8	HMGA1P4	0.348977	3.76129e-12
HRAS	HMGA1P4	0.461775	3.75681e-21
EGLN2	HMGA1P4	0.346884	5.14902e-12
HSPB1	HMGA1P4	0.540232	1.0098e-29
RPL8	AC005076.1	0.403766	4.25387e-16
HRAS	AC005076.1	0.491391	3.95252e-24
EGLN2	AC005076.1	0.403403	4.54414e-16
HSPB1	AC005076.1	0.523771	9.79556e-28
HRAS	AL390198.1	0.32118	2.02001e-10
EGLN2	AL390198.1	0.304094	1.92532e-09
FANCD2	AL390198.1	0.340216	1.37857e-11
GLS2	AC144652.1	0.367856	1.99015e-13
TXNRD1	LINC00886	0.335058	2.90613e-11
SRXN1	LINC00886	0.312501	6.46446e-10
RPL8	AC074212.1	0.521587	1.76433e-27
HRAS	AC074212.1	0.371969	1.02192e-13
EGLN2	AC074212.1	0.589847	2.01151e-36
HSPB1	AC074212.1	0.301062	2.83002e-09
HSF1	AC074212.1	0.380191	2.62078e-14
SLC2A14	AC074212.1	0.475404	1.73906e-22
RPL8	SNHG19	0.61356	4.69851e-40
HRAS	SNHG19	0.523383	1.08778e-27
EGLN2	SNHG19	0.474765	2.01479e-22
HSPB1	SNHG19	0.55456	1.52652e-31
HSF1	SNHG19	0.314545	4.93156e-10
GLS2	LINC00870	0.330709	5.39247e-11
BAP1	LINC00870	0.321315	1.98308e-10
DUOX1	AC009237.15	0.315272	4.47705e-10
SLC1A5	AC009237.15	0.410185	1.3072e-16
ABCC1	AC009237.15	0.406336	2.66029e-16
DNAJB6	AC009237.15	0.332221	4.35452e-11
FANCD2	AC009237.15	0.307469	1.2474e-09
PML	AC009237.15	0.394607	2.19328e-15
NF2	AC009237.15	0.319344	2.59149e-10
CAV1	AC009237.15	0.417766	3.13812e-17
SLC7A5	AC009237.15	0.300571	3.01087e-09
RPL8	AC009403.1	0.334029	3.36686e-11
FTL	AC009403.1	0.416913	3.69183e-17
CDKN2A	AL109811.3	0.323837	1.40412e-10
MYB	AL109811.3	0.306699	1.3779e-09
TAZ	AL109811.3	0.301889	2.54884e-09
FANCD2	AL109811.3	0.344725	7.10084e-12
ZNF419	AL109811.3	0.310394	8.52528e-10
STMN1	AL109811.3	0.43091	2.42429e-18
ZNF419	AC010503.4	0.30481	1.75675e-09
PRKAA2	MIR325HG	0.37538	5.83767e-14
AKR1C1	MIR325HG	0.302022	2.50619e-09
AKR1C2	MIR325HG	0.354333	1.66619e-12
SLC38A1	TNRC6C-AS1	0.357914	9.58587e-13
SLC1A5	TNRC6C-AS1	0.336576	2.3369e-11
MAPK3	TNRC6C-AS1	0.401458	6.46276e-16
CDKN2A	TNRC6C-AS1	0.378665	3.38342e-14
MYB	TNRC6C-AS1	0.330529	5.53121e-11
ABCC1	TNRC6C-AS1	0.300278	3.1239e-09
SRC	TNRC6C-AS1	0.317484	3.33012e-10
PML	TNRC6C-AS1	0.334022	3.37022e-11
SLC2A6	TNRC6C-AS1	0.331009	5.16919e-11
CAPG	TNRC6C-AS1	0.323907	1.39074e-10
MAPK3	AC106782.2	0.369205	1.60091e-13
AIFM2	AC106782.2	0.332799	4.01116e-11
NRAS	Z95115.1	0.373268	8.26357e-14
ALOX12	Z95115.1	0.303363	2.11364e-09
MAPK3	Z95115.1	0.343215	8.87793e-12
FANCD2	Z95115.1	0.412176	9.01823e-17
HELLS	Z95115.1	0.31925	2.6248e-10
ZNF419	Z95115.1	0.344101	7.78796e-12
SLC2A1	Z95115.1	0.338793	1.69585e-11
NRAS	AC115618.2	0.358619	8.58963e-13
TFRC	AC115618.2	0.338338	1.81161e-11
SLC38A1	AC115618.2	0.330073	5.89809e-11
ALOX12	AC115618.2	0.349436	3.50992e-12
ABCC1	AC115618.2	0.324486	1.28413e-10
DNAJB6	AC115618.2	0.35255	2.18873e-12
PML	AC115618.2	0.366686	2.4014e-13
CAV1	AC115618.2	0.402151	5.70157e-16
ZFP69B	AC115618.2	0.351064	2.74375e-12
CS	AC115619.1	-0.384931	1.17497e-14
NRAS	AC115619.1	-0.335689	2.65451e-11
SLC38A1	AC115619.1	-0.30282	2.26475e-09
MAPK3	AC115619.1	-0.426683	5.59213e-18
CDKN2A	AC115619.1	-0.300764	2.93824e-09
ABCC1	AC115619.1	-0.345276	6.54315e-12
YY1AP1	AC115619.1	-0.370119	1.3808e-13
DNAJB6	AC115619.1	-0.323084	1.55723e-10
FANCD2	AC115619.1	-0.370608	1.27553e-13
PML	AC115619.1	-0.331177	5.0476e-11
CAV1	AC115619.1	-0.31956	2.51694e-10
ZFP69B	AC115619.1	-0.330448	5.59447e-11
STMN1	AC115619.1	-0.412338	8.74863e-17
HELLS	AP002807.1	0.309915	9.07652e-10
FADS2	AP002807.1	0.41172	9.82043e-17
GLS2	AC021744.1	0.30599	1.50977e-09
NRAS	LINC02228	0.311225	7.64575e-10
FANCD2	LINC02228	0.404471	3.74172e-16
STMN1	LINC02228	0.328831	7.0209e-11
IL6	AL365226.2	0.401133	6.8521e-16
G6PD	AC026401.3	0.533283	7.18314e-29
HRAS	AC026401.3	0.490689	4.68654e-24
SLC1A5	AC026401.3	0.592421	8.38922e-37
MAPK3	AC026401.3	0.609046	2.43688e-39
CDKN2A	AC026401.3	0.61101	1.19451e-39
MYB	AC026401.3	0.399844	8.64107e-16
ABCC1	AC026401.3	0.355124	1.47562e-12
EGLN2	AC026401.3	0.332732	4.04993e-11
AKR1C3	AC026401.3	0.400925	7.1138e-16
HSPB1	AC026401.3	0.376015	5.25639e-14
HSF1	AC026401.3	0.332322	4.29225e-11
FANCD2	AC026401.3	0.58273	2.16769e-35
HELLS	AC026401.3	0.411988	9.34085e-17
SRC	AC026401.3	0.329007	6.85038e-11
PML	AC026401.3	0.397157	1.39652e-15
NF2	AC026401.3	0.368635	1.75524e-13
ASNS	AC026401.3	0.350945	2.79376e-12
SLC7A5	AC026401.3	0.357943	9.54281e-13
MAFG	AC026401.3	0.329649	6.25998e-11
SLC2A1	AC026401.3	0.355498	1.39309e-12
SLC2A6	AC026401.3	0.318782	2.79632e-10
STMN1	AC026401.3	0.647471	8.12529e-46
RRM2	AC026401.3	0.491553	3.7991e-24
CAPG	AC026401.3	0.333819	3.46921e-11
AURKA	AC026401.3	0.391627	3.69953e-15
CS	LINC00960	0.310345	8.57992e-10
SLC38A1	LINC00960	0.329191	6.67552e-11
FANCD2	LINC00960	0.360222	6.68707e-13
HRAS	AC080013.6	0.446134	1.0825e-19
EGLN2	AC080013.6	0.339145	1.61129e-11
HSPB1	AC080013.6	0.435592	9.47463e-19
FANCD2	AL139023.1	0.341583	1.12855e-11
STMN1	AL139023.1	0.348316	4.1545e-12
RRM2	AL139023.1	0.358979	8.12052e-13
DUOX1	AL591895.1	0.316322	3.89167e-10
SLC38A1	AL591895.1	0.369527	1.51987e-13
TAZ	AL591895.1	0.317974	3.11782e-10
SRC	AL591895.1	0.38496	1.16914e-14
NF2	AL591895.1	0.302436	2.37796e-09
ZNF419	AL591895.1	0.412063	9.21143e-17
RPL8	AC040169.1	0.387399	7.69786e-15
HRAS	AC040169.1	0.335656	2.6673e-11
HSPB1	AC040169.1	0.364146	3.60081e-13
EMC2	DBH-AS1	-0.310379	8.54234e-10
PRKAA2	AC090150.1	0.314445	4.99812e-10
AKR1C2	AC090150.1	0.304974	1.72021e-09
TUBE1	FAM99B	0.343297	8.77071e-12
STEAP3	FAM99B	0.356897	1.12226e-12
CS	UCA1	0.312449	6.50843e-10
DUOX1	UCA1	0.344599	7.23469e-12
SLC38A1	UCA1	0.320931	2.08954e-10
NRAS	LINC01194	0.402514	5.33895e-16
MAPK3	LINC01194	0.305393	1.63016e-09
BAP1	LINC01194	0.308212	1.13292e-09
AKR1C3	LINC01194	0.33692	2.22362e-11
FANCD2	LINC01194	0.463862	2.36749e-21
STMN1	LINC01194	0.504493	1.52751e-25
RRM2	LINC01194	0.395808	1.77415e-15
NRAS	LYRM4-AS1	0.325999	1.04179e-10
AKR1C3	LYRM4-AS1	0.331586	4.76387e-11
ZFP69B	LYRM4-AS1	0.352186	2.31358e-12
SLC7A11	AC104971.3	0.413173	7.48125e-17
PRKAA2	AC105277.1	0.302289	2.42277e-09
SQSTM1	LINC01731	0.401373	6.56236e-16
RPL8	LINC02027	0.480701	5.07311e-23
DUOX1	AC022706.1	0.404467	3.7443e-16
CAPG	AC022706.1	0.332849	3.98288e-11
ASNS	CCDC183-AS1	0.349113	3.68497e-12
RPL8	AC008610.1	0.443435	1.9002e-19
HRAS	AC008610.1	0.610026	1.70863e-39
EGLN2	AC008610.1	0.488631	7.70443e-24
HSPB1	AC008610.1	0.66542	3.56663e-49
AKR1C1	AL033397.1	0.421282	1.59955e-17
AKR1C2	AL033397.1	0.501142	3.55788e-25
SQSTM1	AL033397.1	0.302398	2.38943e-09
NQO1	AL033397.1	0.327703	8.2201e-11
TXNRD1	AL033397.1	0.546201	1.80478e-30
SRXN1	AL033397.1	0.506464	9.25006e-26
PML	HOTAIRM1	0.394318	2.30804e-15
CAV1	HOTAIRM1	0.500192	4.51367e-25
CS	LINC02331	0.483072	2.90234e-23
TFRC	LINC02331	0.352364	2.2517e-12
SLC38A1	LINC02331	0.489967	5.58163e-24
ALOX12	LINC02331	0.327628	8.30633e-11
ABCC1	LINC02331	0.529148	2.25936e-28
PML	LINC02331	0.311953	6.94829e-10
CAV1	LINC02331	0.323729	1.42512e-10
SQSTM1	AC100872.1	0.472286	3.55524e-22
DDIT3	AC100872.1	0.398621	1.07554e-15
CDKN2A	TMPO-AS1	0.345251	6.5673e-12
MYB	TMPO-AS1	0.433685	1.39161e-18
BAP1	TMPO-AS1	0.321717	1.87729e-10
YY1AP1	TMPO-AS1	0.349364	3.54836e-12
FANCD2	TMPO-AS1	0.56102	2.15605e-32
HELLS	TMPO-AS1	0.551272	4.06644e-31
STMN1	TMPO-AS1	0.635604	1.01948e-43
RRM2	TMPO-AS1	0.448101	7.16063e-20
AURKA	TMPO-AS1	0.465302	1.71878e-21
IL6	AC108451.2	0.541344	7.3462e-30
SLC2A6	WDR86-AS1	0.322796	1.61981e-10
NOX4	AC010457.1	0.381124	2.24013e-14
AKR1C1	LIVAR	0.329073	6.78737e-11
AKR1C2	LIVAR	0.321637	1.898e-10
SRXN1	LIVAR	0.300895	2.89032e-09
RPL8	AL138930.1	0.36017	6.74161e-13
EGLN2	AL138930.1	0.409992	1.3549e-16
SLC2A14	AL138930.1	0.611204	1.11302e-39
HRAS	AC103691.1	0.402309	5.54117e-16
EGLN2	AC103691.1	0.351938	2.40271e-12
HSPB1	AC103691.1	0.417101	3.56182e-17
DDIT3	AC103691.1	0.304431	1.84414e-09
CS	NIFK-AS1	0.378337	3.57405e-14
NRAS	NIFK-AS1	0.387085	8.12567e-15
SLC38A1	NIFK-AS1	0.311209	7.66174e-10
ALOX12	NIFK-AS1	0.449664	5.14657e-20
MAPK3	NIFK-AS1	0.41478	5.52887e-17
ABCC1	NIFK-AS1	0.390548	4.46525e-15
FANCD2	NIFK-AS1	0.46712	1.14435e-21
HELLS	NIFK-AS1	0.356467	1.19942e-12
SRC	NIFK-AS1	0.322849	1.60809e-10
CAV1	NIFK-AS1	0.351528	2.55722e-12
ALB	NIFK-AS1	-0.30264	2.31711e-09
ZNF419	NIFK-AS1	0.411722	9.81728e-17
STMN1	NIFK-AS1	0.45923	6.56819e-21
PRKAA2	AC016717.2	0.325264	1.15339e-10
SLC7A11	AC016717.2	0.589171	2.52708e-36
RPL8	AC008771.1	0.311045	7.82884e-10
HRAS	AC008771.1	0.457216	1.01873e-20
CDKN2A	AC008771.1	0.306587	1.39796e-09
ABCC1	AC008771.1	0.329738	6.18189e-11
EGLN2	AC008771.1	0.300318	3.10819e-09
HSPB1	AC008771.1	0.378678	3.37641e-14
STMN1	AC008771.1	0.337386	2.07907e-11
RPL8	YTHDF3-AS1	0.596148	2.33319e-37
HRAS	YTHDF3-AS1	0.462122	3.48016e-21
EGLN2	YTHDF3-AS1	0.359672	7.28801e-13
HSPB1	YTHDF3-AS1	0.495431	1.47108e-24
HSF1	YTHDF3-AS1	0.385863	1.00191e-14
FTL	YTHDF3-AS1	0.325954	1.04828e-10
CS	AC093297.2	0.432801	1.66176e-18
SLC38A1	AC093297.2	0.328787	7.06458e-11
ALOX12	AC093297.2	0.310617	8.28015e-10
YY1AP1	AC093297.2	0.33544	2.75144e-11
SRC	AC093297.2	0.303282	2.1353e-09
ZNF419	AC093297.2	0.384183	1.33461e-14
NRAS	LINC02377	0.35128	2.65553e-12
FANCD2	LINC02377	0.381598	2.06828e-14
STMN1	LINC02377	0.338646	1.73235e-11
SLC38A1	MNX1-AS2	0.30728	1.27839e-09
DDIT3	MNX1-AS2	0.306419	1.42863e-09
SLC7A5	MNX1-AS2	0.305568	1.59402e-09
DRD4	MNX1-AS2	0.502829	2.32726e-25
SLC2A6	MNX1-AS2	0.333725	3.51619e-11
PRKAA2	AC020656.2	0.47995	6.04924e-23
SRC	AC020656.2	0.397411	1.33469e-15
PTGS2	AC020656.2	0.397939	1.21489e-15
SLC1A4	AC020656.2	0.333587	3.58589e-11
SLC1A5	AC103702.2	0.345703	6.1402e-12
PML	AC103702.2	0.432474	1.77407e-18
NF2	AC103702.2	0.372415	9.50159e-14
CAV1	AC103702.2	0.405514	3.09263e-16
CDKN2A	TRHDE-AS1	0.326796	9.32694e-11
HELLS	TRHDE-AS1	0.430431	2.66695e-18
SLC2A6	TRHDE-AS1	0.351019	2.76259e-12
ALOX12	FOXCUT	0.311761	7.12584e-10
ABCC1	FOXCUT	0.381917	1.9599e-14
PRKAA2	LINC01124	0.361038	5.88362e-13
AKR1C2	LINC01124	0.324853	1.22072e-10
TP63	LINC01124	0.603128	2.02748e-38
AIFM2	AC090921.1	0.319986	2.37572e-10
EGLN2	AC007228.1	0.350288	3.08618e-12
CS	ITGB1-DT	0.501101	3.59463e-25
SLC38A1	ITGB1-DT	0.453251	2.3967e-20
HSPB1	C1QTNF1-AS1	0.38606	9.68662e-15
SLC38A1	ARHGAP27P1-BPTFP1-KPNA2P3	0.337961	1.91304e-11
ABCC1	ARHGAP27P1-BPTFP1-KPNA2P3	0.332926	3.93972e-11
CAV1	ARHGAP27P1-BPTFP1-KPNA2P3	0.348662	3.94359e-12
PTGS2	ARHGAP27P1-BPTFP1-KPNA2P3	0.381808	1.99616e-14
ZNF419	ARHGAP27P1-BPTFP1-KPNA2P3	0.48986	5.72837e-24
DUOX1	AC011477.3	0.485413	1.66522e-23
SLC38A1	AC011477.3	0.301582	2.64976e-09
ALOX12	LINC01029	0.311969	6.93382e-10
RPL8	AL353194.1	0.378058	3.74416e-14
HRAS	AL353194.1	0.466476	1.32192e-21
MAPK3	AL353194.1	0.319145	2.66216e-10
EGLN2	AL353194.1	0.429802	3.02154e-18
HSPB1	AL353194.1	0.39086	4.22869e-15
FANCD2	AL353194.1	0.315899	4.11777e-10
ZNF419	AL353194.1	0.325247	1.15613e-10
RPL8	AC025181.2	0.3021	2.48149e-09
HRAS	AC025181.2	0.420906	1.71961e-17
HSPB1	AC025181.2	0.361891	5.14417e-13
RPL8	AC006205.2	0.482973	2.97166e-23
FTL	AC006205.2	0.304554	1.81539e-09
STEAP3	FAM99A	0.324871	1.2178e-10
NOS2	AC008708.1	0.577174	1.33176e-34
HRAS	AC026304.1	0.347625	4.60846e-12
EGLN2	AC026304.1	0.403577	4.40312e-16
G6PD	SMIM25	0.336854	2.24487e-11
ABCC1	SMIM25	0.333761	3.49788e-11
PML	SMIM25	0.42927	3.35779e-18
CAV1	SMIM25	0.304703	1.78102e-09
NCF2	SMIM25	0.37941	2.98738e-14
DDIT4	SMIM25	0.400981	7.04262e-16
SLC2A6	SMIM25	0.400988	7.03375e-16
CAPG	SMIM25	0.534901	4.56759e-29
G6PD	AC090772.3	0.305276	1.65485e-09
AKR1C1	AC090772.3	0.338256	1.83303e-11
AKR1C3	AC090772.3	0.309809	9.20316e-10
AIFM2	AC090772.3	0.309825	9.18406e-10
TXNRD1	AC090772.3	0.459926	5.64042e-21
SRXN1	AC090772.3	0.438225	5.5507e-19
MAFG	AC090772.3	0.368593	1.76728e-13
FANCD2	AL359513.1	0.365	3.14344e-13
HELLS	AL359513.1	0.35467	1.58227e-12
STMN1	AL359513.1	0.386688	8.6991e-15
RRM2	AL359513.1	0.326446	9.79144e-11
ZNF419	ROCR	0.335734	2.6377e-11
RPL8	AL023803.1	0.344798	7.02412e-12
HRAS	AL023803.1	0.34728	4.85275e-12
EGLN2	AL023803.1	0.488418	8.11044e-24
ALOX12	LINC02212	0.316001	4.06204e-10
ABCC1	LINC02212	0.323083	1.5574e-10
SLC38A1	AP000424.1	0.426489	5.80913e-18
ABCC1	AP000424.1	0.376069	5.20972e-14
DUOX1	AC061975.6	0.512918	1.74877e-26
CS	AC102953.2	0.446016	1.10952e-19
NRAS	AC102953.2	0.355781	1.3336e-12
TFRC	AC102953.2	0.323866	1.39869e-10
SLC38A1	AC102953.2	0.439839	3.98953e-19
SLC1A5	AC102953.2	0.331905	4.55368e-11
MAPK3	AC102953.2	0.305118	1.68876e-09
ABCC1	AC102953.2	0.42571	6.76724e-18
YY1AP1	AC102953.2	0.361624	5.36544e-13
DNAJB6	AC102953.2	0.496258	1.19974e-24
FANCD2	AC102953.2	0.432063	1.92603e-18
HELLS	AC102953.2	0.362885	4.39744e-13
SRC	AC102953.2	0.453679	2.18612e-20
PML	AC102953.2	0.376217	5.08355e-14
NF2	AC102953.2	0.458806	7.20523e-21
ASNS	AC102953.2	0.370276	1.34607e-13
SLC7A5	AC102953.2	0.386764	8.58622e-15
ZNF419	AC102953.2	0.312489	6.47467e-10
ZFP69B	AC102953.2	0.339133	1.61405e-11
MAFG	AC102953.2	0.38062	2.43862e-14
STMN1	AC102953.2	0.34798	4.36924e-12
RRM2	AC102953.2	0.324382	1.30268e-10
AURKA	AC102953.2	0.315087	4.58884e-10
RPL8	AP004609.3	0.312127	6.7907e-10
HRAS	AP004609.3	0.347952	4.38767e-12
EGLN2	AP004609.3	0.569429	1.58052e-33
YY1AP1	HAGLR	0.397366	1.3455e-15
ENPP2	HAGLR	0.301416	2.70614e-09
SLC2A6	HAGLR	0.342997	9.16786e-12
TP63	AL356364.1	0.431542	2.13741e-18
MT3	AL356364.1	0.346947	5.10061e-12
RPL8	SNHG12	0.383936	1.39193e-14
CS	SNHG12	0.370597	1.27771e-13
G6PD	SNHG12	0.334	3.38073e-11
HRAS	SNHG12	0.395052	2.02767e-15
SLC38A1	SNHG12	0.471729	4.037e-22
SLC1A5	SNHG12	0.448364	6.77421e-20
MAPK3	SNHG12	0.315353	4.42926e-10
CDKN2A	SNHG12	0.34521	6.60719e-12
MYB	SNHG12	0.346972	5.08114e-12
ABCC1	SNHG12	0.393961	2.45787e-15
EGLN2	SNHG12	0.300433	3.06382e-09
DNAJB6	SNHG12	0.373873	7.48224e-14
HSPB1	SNHG12	0.348645	3.9542e-12
HSF1	SNHG12	0.360059	6.85977e-13
FANCD2	SNHG12	0.409739	1.42e-16
HELLS	SNHG12	0.348824	3.84874e-12
SRC	SNHG12	0.368988	1.65811e-13
PML	SNHG12	0.326414	9.83513e-11
NF2	SNHG12	0.337077	2.17397e-11
CAV1	SNHG12	0.313575	5.60903e-10
ASNS	SNHG12	0.404833	3.50285e-16
DDIT3	SNHG12	0.345404	6.42005e-12
SLC7A5	SNHG12	0.354793	1.55272e-12
ZNF419	SNHG12	0.37373	7.66009e-14
SLC2A6	SNHG12	0.364417	3.44905e-13
STMN1	SNHG12	0.399356	9.43049e-16
CAPG	SNHG12	0.320488	2.21924e-10
RPL8	ARF4-AS1	0.537186	2.39989e-29
HRAS	ARF4-AS1	0.55678	7.82811e-32
EGLN2	ARF4-AS1	0.430667	2.54462e-18
AKR1C1	ARF4-AS1	0.372842	8.86081e-14
AKR1C3	ARF4-AS1	0.310571	8.33075e-10
HSPB1	ARF4-AS1	0.581226	3.55553e-35
HSF1	ARF4-AS1	0.419877	2.096e-17
NQO1	ARF4-AS1	0.319415	2.5668e-10
AIFM2	ARF4-AS1	0.338349	1.80871e-11
GPX2	ARF4-AS1	0.40983	1.39626e-16
FTL	ARF4-AS1	0.455442	1.4959e-20
CS	AC136475.2	0.321199	2.01488e-10
ALOX12	AC136475.2	0.45855	7.61915e-21
CAV1	AC136475.2	0.311084	7.78842e-10
STMN1	AL590705.1	0.306572	1.40063e-09
RRM2	AL590705.1	0.312944	6.09694e-10
RPL8	AC104958.2	0.431034	2.36517e-18
HSF1	AC104958.2	0.435468	9.71448e-19
ABCC1	AFAP1-AS1	0.40868	1.72774e-16
SQSTM1	AFAP1-AS1	0.312132	6.78624e-10
TXNRD1	AFAP1-AS1	0.302536	2.34804e-09
MAFG	AFAP1-AS1	0.307341	1.26833e-09
SLC1A5	AC083967.1	0.579797	5.67633e-35
PML	AC083967.1	0.447682	7.82102e-20
NF2	AC083967.1	0.417424	3.34997e-17
CAV1	AC083967.1	0.438236	5.53826e-19
SLC2A1	AC083967.1	0.342567	9.76749e-12
AURKA	AC083967.1	0.30594	1.51949e-09
HRAS	AP006621.3	0.344414	7.43599e-12
HSPB1	AP006621.3	0.304884	1.7402e-09
SLC38A1	LINC01671	0.364486	3.41163e-13
YY1AP1	LINC01671	0.324455	1.28959e-10
DDIT3	LINC01671	0.375912	5.3469e-14
SLC2A6	LINC01671	0.351198	2.68869e-12
DDIT3	AC024361.1	0.306517	1.41071e-09
FTL	AC093726.1	-0.306099	1.48865e-09
NRAS	AC109588.1	0.305088	1.69529e-09
STMN1	AC109588.1	0.315739	4.20692e-10
HELLS	AC124016.2	0.332379	4.25784e-11
ZNF419	AC124016.2	0.358101	9.31022e-13
DUOX1	AL596223.2	0.440549	3.4484e-19
SLC38A1	AL596223.2	0.419831	2.11436e-17
ABCC1	AL596223.2	0.320366	2.25655e-10
NF2	AL596223.2	0.369361	1.56115e-13
DDIT3	AL596223.2	0.419488	2.25801e-17
SLC7A5	AL596223.2	0.421133	1.64618e-17
DRD4	AL596223.2	0.610977	1.20919e-39
SLC2A6	AL596223.2	0.506832	8.42105e-26
DUOX1	AC123912.4	0.493782	2.20534e-24
RPL8	AC090912.2	0.344926	6.89224e-12
HRAS	AC090912.2	0.377925	3.82784e-14
HSPB1	AC090912.2	0.345382	6.44073e-12
GPX2	AC090912.2	0.362364	4.77486e-13
FTL	AC090912.2	0.353718	1.83113e-12
GLS2	AP006216.2	0.399667	8.91933e-16
ALOX15B	AP006216.2	0.344303	7.5588e-12
SLC1A5	LINC01605	0.426986	5.26902e-18
PML	LINC01605	0.35614	1.26168e-12
NF2	LINC01605	0.335201	2.84735e-11
CAV1	LINC01605	0.373583	7.84756e-14
SLC2A1	LINC01605	0.303785	2.00272e-09
AURKA	LINC01605	0.38106	2.2644e-14
DUOX1	AP000424.2	0.434974	1.07348e-18
SLC38A1	AP000424.2	0.358852	8.28335e-13
ABCC1	AP000424.2	0.348443	4.07585e-12
NRAS	AC009237.14	0.348555	4.00793e-12
ALOX12	AC009237.14	0.389994	4.91622e-15
YY1AP1	AC009237.14	0.347519	4.68206e-12
ZFP69B	AC009237.14	0.333645	3.55635e-11
ABCC1	AC108752.1	0.375164	6.04986e-14
PML	AC108752.1	0.341161	1.20062e-11
CS	AL049555.1	0.39402	2.43255e-15
DUOX1	AL049555.1	0.325089	1.18161e-10
SLC38A1	AL049555.1	0.438452	5.29954e-19
ABCC1	AL049555.1	0.458577	7.5751e-21
SRC	AL049555.1	0.335605	2.68707e-11
NF2	AL049555.1	0.31205	6.8603e-10
PTGS2	AL049555.1	0.346519	5.43687e-12
DRD4	AL049555.1	0.386513	8.96394e-15
SLC2A6	AL049555.1	0.359106	7.96148e-13
ZNF419	AFDN-DT	0.303851	1.98586e-09
ZNF419	AC009283.1	0.337457	2.05786e-11
RRM2	LINC00528	0.308392	1.10673e-09
MAPK3	AF001548.2	0.355964	1.29638e-12
ABCC1	AF001548.2	0.326709	9.44012e-11
PML	AF001548.2	0.301118	2.80998e-09
STMN1	AF001548.2	0.326477	9.74992e-11
CS	AP000757.2	0.371391	1.12292e-13
SLC38A1	AP000757.2	0.408418	1.81341e-16
NF2	AP000757.2	0.302119	2.47563e-09
DDIT3	AP000757.2	0.343076	9.06197e-12
DRD4	AP000757.2	0.486508	1.28218e-23
SLC2A6	AP000757.2	0.340617	1.30007e-11
TAZ	LINC01569	0.308423	1.10229e-09
HRAS	NADK2-AS1	-0.308554	1.08377e-09
TUBE1	NADK2-AS1	0.313444	5.70727e-10
RPL8	AC073611.1	0.399678	8.90171e-16
G6PD	AC073611.1	0.392853	2.98575e-15
HRAS	AC073611.1	0.488198	8.55025e-24
SLC38A1	AC073611.1	0.350195	3.12999e-12
SLC1A5	AC073611.1	0.379987	2.71183e-14
MAPK3	AC073611.1	0.361761	5.25099e-13
CDKN2A	AC073611.1	0.32215	1.76965e-10
ABCC1	AC073611.1	0.353929	1.77292e-12
EGLN2	AC073611.1	0.359786	7.15946e-13
DNAJB6	AC073611.1	0.311214	7.65686e-10
HSPB1	AC073611.1	0.460152	5.3678e-21
HSF1	AC073611.1	0.370159	1.37182e-13
FANCD2	AC073611.1	0.313105	5.96909e-10
SRC	AC073611.1	0.30404	1.93855e-09
PML	AC073611.1	0.340269	1.36787e-11
NCF2	AC073611.1	0.346252	5.65799e-12
ALB	AC073611.1	-0.340615	1.30048e-11
ASNS	AC073611.1	0.31026	8.67672e-10
FTL	AC073611.1	0.325819	1.06808e-10
MAFG	AC073611.1	0.334342	3.21965e-11
CDKN2A	AL162724.2	0.312079	6.83417e-10
FANCD2	AL162724.2	0.307483	1.24517e-09
STMN1	AL162724.2	0.327235	8.77412e-11
HRAS	SNHG15	0.311278	7.59259e-10
SLC38A1	SNHG15	0.31946	2.55122e-10
ABCC1	SNHG15	0.303585	2.05449e-09
EGLN2	SNHG15	0.305463	1.61565e-09
ASNS	SNHG15	0.322937	1.58897e-10
RPL8	CYTOR	0.478384	8.71935e-23
G6PD	CYTOR	0.38468	1.22633e-14
HRAS	CYTOR	0.586665	5.86476e-36
SLC1A5	CYTOR	0.327923	7.97142e-11
MAPK3	CYTOR	0.353818	1.80333e-12
ABCC1	CYTOR	0.489537	6.19331e-24
EGLN2	CYTOR	0.43201	1.94682e-18
HSPB1	CYTOR	0.545048	2.52364e-30
HSF1	CYTOR	0.380767	2.37908e-14
NQO1	CYTOR	0.331961	4.51792e-11
AIFM2	CYTOR	0.309069	1.01347e-09
CAV1	CYTOR	0.319923	2.39621e-10
GPX2	CYTOR	0.313046	6.01568e-10
FTL	CYTOR	0.341603	1.12529e-11
PML	U62317.1	0.313789	5.4521e-10
GLS2	AP000695.1	0.459067	6.80734e-21
HELLS	AP000695.1	0.336146	2.48603e-11
FTL	AP000695.1	-0.317785	3.19803e-10
DUOX1	AC006042.1	0.439092	4.64958e-19
SRC	AC006042.1	0.312943	6.09774e-10
PTGS2	AC006042.1	0.422792	1.19451e-17
ZNF419	AC006042.1	0.458172	8.27425e-21
GPX2	AC007639.1	0.30166	2.62391e-09
SLC2A14	AC022509.2	0.426425	5.88246e-18
EMC2	AC090198.1	0.368797	1.70995e-13
ALOX12	AC090198.1	0.389698	5.17475e-15
BAP1	ELOA-AS1	0.355555	1.38085e-12
RPL8	OTUD6B-AS1	0.315125	4.56545e-10
EMC2	OTUD6B-AS1	0.667464	1.42887e-49
PRKAA2	OTUD6B-AS1	0.302114	2.47721e-09
AKR1C1	OTUD6B-AS1	0.342246	1.02399e-11
HSF1	OTUD6B-AS1	0.530452	1.57659e-28
SRC	OTUD6B-AS1	0.314084	5.24342e-10
GPX2	OTUD6B-AS1	0.313911	5.36514e-10
RPL8	AL035045.1	0.34424	7.63012e-12
HRAS	AL035045.1	0.460395	5.08941e-21
EGLN2	AL035045.1	0.304186	1.90268e-09
HSPB1	AL035045.1	0.499791	4.98941e-25
SLC7A11	LINC02565	0.300424	3.06704e-09
AKR1C2	LINC01816	0.317791	3.19544e-10
FANCD2	LINC01611	0.362192	4.90611e-13
STMN1	LINC01611	0.436001	8.72238e-19
PRKAA2	LINC01549	0.316508	3.79601e-10
SLC7A11	LINC01549	0.3899	4.99657e-15
RPL8	LINC00896	0.322128	1.77497e-10
HRAS	LINC00896	0.395079	2.01799e-15
HSPB1	LINC00896	0.457429	9.72536e-21
HRAS	AC027307.2	0.324868	1.21831e-10
TAZ	AC027307.2	0.357366	1.04368e-12
HSPB1	AC027307.2	0.38382	1.41964e-14
STEAP3	HNF4A-AS1	0.311808	7.08204e-10
SLC2A6	HNF4A-AS1	-0.321994	1.80778e-10
DUOX1	LINC00494	0.391228	3.96664e-15
ZNF419	LINC00494	0.344583	7.25154e-12
CS	AC005034.3	0.453858	2.10409e-20
NRAS	AC005034.3	0.30352	2.07153e-09
SLC38A1	AC005034.3	0.34333	8.72849e-12
ALOX12	AC005034.3	0.385912	9.93622e-15
ABCC1	AC005034.3	0.366022	2.67044e-13
YY1AP1	AC005034.3	0.351895	2.41845e-12
SRC	AC005034.3	0.37778	3.92128e-14
MAFG	AC005034.3	0.341823	1.08959e-11
RRM2	AL713998.1	0.313997	5.30411e-10
CS	AC016735.1	0.397029	1.42863e-15
SLC38A1	AC016735.1	0.31317	5.91752e-10
ACSL4	PRKAG2-AS1	-0.317055	3.5277e-10
BAP1	U91328.1	0.351946	2.39979e-12
AKR1C1	LINC01474	0.446421	1.01939e-19
NQO1	LINC01474	0.332734	4.04834e-11
AKR1C1	AP000844.2	0.341676	1.11329e-11
HSPB1	AC147067.1	0.316871	3.61549e-10
DRD4	AC147067.1	0.385239	1.11477e-14
HRAS	AC010331.1	0.378129	3.69974e-14
EGLN2	AC010331.1	0.464752	1.94247e-21
ZNF419	AC010331.1	0.365453	2.92437e-13
ALOX12	LINC01003	0.317549	3.30116e-10
RPL8	SNHG6	0.839502	1.3914e-100
HRAS	SNHG6	0.604012	1.48208e-38
EGLN2	SNHG6	0.479077	7.41933e-23
HSPB1	SNHG6	0.612512	6.90171e-40
HSF1	SNHG6	0.552295	3.00105e-31
GPX2	SNHG6	0.319943	2.38964e-10
FTL	SNHG6	0.387258	7.88701e-15
AKR1C1	AL512353.1	0.417866	3.07887e-17
AKR1C2	AL512353.1	0.469262	7.06546e-22
AKR1C3	AL512353.1	0.338903	1.66899e-11
NQO1	AL512353.1	0.364182	3.58036e-13
TXNRD1	AL512353.1	0.517818	4.82157e-27
SRXN1	AL512353.1	0.471195	4.55817e-22
GPX2	AL512353.1	0.383424	1.51849e-14
MAFG	AL512353.1	0.34018	1.38581e-11
AKR1C3	AL117336.3	0.331727	4.6697e-11
SQSTM1	AL117336.3	0.317474	3.33488e-10
FANCD2	AL117336.3	0.349186	3.64456e-12
SRC	AL117336.3	0.303431	2.09516e-09
ZNF419	AL117336.3	0.339526	1.52445e-11
MAFG	AL117336.3	0.329994	5.96336e-11
STMN1	AL117336.3	0.344671	7.15776e-12
SLC1A5	ZNF674-AS1	0.350261	3.09858e-12
FANCD2	ZNF674-AS1	0.443946	1.70867e-19
HELLS	ZNF674-AS1	0.399064	9.93765e-16
NF2	ZNF674-AS1	0.401475	6.44244e-16
CAV1	ZNF674-AS1	0.333322	3.72389e-11
SLC7A5	ZNF674-AS1	0.308979	1.02545e-09
ZNF419	ZNF674-AS1	0.329512	6.38146e-11
STMN1	ZNF674-AS1	0.389508	5.34838e-15
RRM2	ZNF674-AS1	0.370812	1.23393e-13
AURKA	ZNF674-AS1	0.393852	2.50548e-15
MYB	AC069061.2	0.455394	1.5113e-20
DUOX1	ZNF793-AS1	0.309927	9.06281e-10
CDKN2A	ZNF793-AS1	0.375748	5.4933e-14
FANCD2	ZNF793-AS1	0.39388	2.49319e-15
HELLS	ZNF793-AS1	0.371865	1.03943e-13
ZNF419	ZNF793-AS1	0.326636	9.53647e-11
STMN1	ZNF793-AS1	0.485175	1.76261e-23
G6PD	THUMPD3-AS1	0.314448	4.99615e-10
HRAS	THUMPD3-AS1	0.368377	1.83002e-13
SLC1A5	THUMPD3-AS1	0.358932	8.18067e-13
MAPK3	THUMPD3-AS1	0.360228	6.68053e-13
AKR1C3	THUMPD3-AS1	0.303891	1.97594e-09
HSF1	THUMPD3-AS1	0.346994	5.06501e-12
FANCD2	THUMPD3-AS1	0.53838	1.71107e-29
HELLS	THUMPD3-AS1	0.346801	5.21305e-12
SRC	THUMPD3-AS1	0.346495	5.45704e-12
NF2	THUMPD3-AS1	0.325483	1.1189e-10
AIFM2	THUMPD3-AS1	0.312855	6.16941e-10
ALB	THUMPD3-AS1	-0.310645	8.24994e-10
ASNS	THUMPD3-AS1	0.329612	6.29278e-11
DDIT3	THUMPD3-AS1	0.359978	6.94679e-13
ZNF419	THUMPD3-AS1	0.377251	4.28238e-14
MAFG	THUMPD3-AS1	0.386893	8.39775e-15
STMN1	THUMPD3-AS1	0.394173	2.36788e-15
BAP1	AC118553.1	0.349772	3.33651e-12
FANCD2	MIR548XHG	0.498195	7.42588e-25
HELLS	MIR548XHG	0.323869	1.39796e-10
STMN1	MIR548XHG	0.473955	2.42713e-22
RRM2	MIR548XHG	0.351968	2.39155e-12
ACSL4	AC022816.1	0.400449	7.75061e-16
PRKAA2	AC008549.1	0.378949	3.22699e-14
SLC2A6	AC008549.1	-0.344295	7.56759e-12
HRAS	AC024060.1	0.401256	6.70192e-16
SLC1A5	AC024060.1	0.335953	2.55588e-11
EGLN2	AC024060.1	0.361628	5.36163e-13
FANCD2	AC024060.1	0.385122	1.1372e-14
NF2	AC024060.1	0.382677	1.7235e-14
DDIT3	AC024060.1	0.403893	4.15732e-16
ZNF419	AC024060.1	0.369714	1.47445e-13
DRD4	AC024060.1	0.408566	1.7646e-16
SLC2A6	AC024060.1	0.442516	2.29879e-19
SLC1A5	LINC01615	0.630769	6.87303e-43
PML	LINC01615	0.481483	4.22181e-23
NF2	LINC01615	0.431512	2.15021e-18
CAV1	LINC01615	0.471209	4.54434e-22
DDIT4	LINC01615	0.320096	2.34063e-10
SLC7A5	LINC01615	0.301253	2.76255e-09
SLC2A1	LINC01615	0.349382	3.53857e-12
RPL8	AC104986.2	0.540439	9.51745e-30
EMC2	AC104986.2	0.359207	7.83629e-13
HRAS	AC104986.2	0.35208	2.3513e-12
AKR1C1	AC104986.2	0.364469	3.42096e-13
AKR1C2	AC104986.2	0.303867	1.98189e-09
HSPB1	AC104986.2	0.414138	6.24075e-17
HSF1	AC104986.2	0.536747	2.71652e-29
FTL	AC104986.2	0.354464	1.63317e-12
CS	AC000123.1	0.344902	6.91648e-12
NRAS	AC000123.1	0.351733	2.47858e-12
SLC38A1	AC000123.1	0.46638	1.35073e-21
ALOX12	AC000123.1	0.308245	1.12809e-09
ABCC1	AC000123.1	0.383484	1.50307e-14
YY1AP1	AC000123.1	0.320663	2.16716e-10
DNAJB6	AC000123.1	0.523439	1.07144e-27
FANCD2	AC000123.1	0.304925	1.73116e-09
SRC	AC000123.1	0.367753	2.02344e-13
PML	AC000123.1	0.310321	8.60755e-10
NF2	AC000123.1	0.307112	1.30637e-09
ASNS	AC000123.1	0.32573	1.08137e-10
ZFP69B	AC000123.1	0.383596	1.47468e-14
MAFG	AC000123.1	0.409429	1.50394e-16
MAPK3	AC006942.1	0.326924	9.16278e-11
RPL8	AC046143.2	0.406529	2.56805e-16
HRAS	AC046143.2	0.574299	3.36165e-34
SLC1A5	AC046143.2	0.32359	1.4527e-10
CDKN2A	AC046143.2	0.358254	9.09192e-13
EGLN2	AC046143.2	0.599225	8.0074e-38
HSPB1	AC046143.2	0.4835	2.62336e-23
HSF1	AC046143.2	0.305169	1.67766e-09
CS	SNHG4	0.354937	1.51871e-12
G6PD	SNHG4	0.360117	6.7974e-13
NRAS	SNHG4	0.337064	2.17804e-11
SLC38A1	SNHG4	0.48942	6.36932e-24
ALOX12	SNHG4	0.336107	2.50002e-11
ABCC1	SNHG4	0.547667	1.17618e-30
YY1AP1	SNHG4	0.303618	2.04582e-09
DNAJB6	SNHG4	0.401039	6.96902e-16
SQSTM1	SNHG4	0.308807	1.04867e-09
FANCD2	SNHG4	0.396326	1.61845e-15
SRC	SNHG4	0.413845	6.59341e-17
TXNRD1	SNHG4	0.300105	3.19268e-09
ASNS	SNHG4	0.38784	7.13549e-15
ZNF419	SNHG4	0.30406	1.93356e-09
ZFP69B	SNHG4	0.401763	6.11614e-16
MAFG	SNHG4	0.42825	4.10754e-18
SLC38A1	BAIAP2-DT	0.429791	3.0279e-18
SLC1A5	BAIAP2-DT	0.306238	1.46234e-09
MAPK3	BAIAP2-DT	0.323515	1.46783e-10
YY1AP1	BAIAP2-DT	0.305895	1.52842e-09
NF2	BAIAP2-DT	0.312804	6.21094e-10
ZNF419	BAIAP2-DT	0.40084	7.22392e-16
DUOX1	MELTF-AS1	0.356741	1.14977e-12
HRAS	MELTF-AS1	0.318542	2.88828e-10
SLC38A1	MELTF-AS1	0.367598	2.07426e-13
SLC1A5	MELTF-AS1	0.395633	1.82982e-15
MAPK3	MELTF-AS1	0.351324	2.63748e-12
CDKN2A	MELTF-AS1	0.379788	2.80388e-14
MYB	MELTF-AS1	0.357824	9.72039e-13
ABCC1	MELTF-AS1	0.356373	1.21699e-12
YY1AP1	MELTF-AS1	0.311947	6.95369e-10
EGLN2	MELTF-AS1	0.31929	2.61064e-10
TAZ	MELTF-AS1	0.304817	1.75509e-09
FANCD2	MELTF-AS1	0.373398	8.08925e-14
HELLS	MELTF-AS1	0.416468	4.01682e-17
SRC	MELTF-AS1	0.326614	9.5661e-11
NF2	MELTF-AS1	0.41515	5.15607e-17
ZNF419	MELTF-AS1	0.376651	4.73076e-14
SLC2A6	MELTF-AS1	0.428968	3.56425e-18
STMN1	MELTF-AS1	0.41748	3.31395e-17
CS	AL355102.4	0.344165	7.71494e-12
SLC38A1	AL355102.4	0.492817	2.79266e-24
ALOX12	AL355102.4	0.35134	2.63131e-12
ABCC1	AL355102.4	0.373984	7.34758e-14
YY1AP1	AL355102.4	0.301795	2.57934e-09
CAV1	AL355102.4	0.359262	7.76989e-13
ZNF419	AL355102.4	0.45975	5.86162e-21
RPL8	AC004233.4	0.372156	9.91206e-14
HRAS	AC004233.4	0.490616	4.76948e-24
EGLN2	AC004233.4	0.370733	1.24989e-13
HSPB1	AC004233.4	0.516435	6.95189e-27
CS	LINC02035	0.499554	5.29324e-25
DUOX1	LINC02035	0.387738	7.26168e-15
NRAS	LINC02035	0.315954	4.08775e-10
SLC38A1	LINC02035	0.483652	2.53031e-23
ALOX12	LINC02035	0.533608	6.55861e-29
ABCC1	LINC02035	0.655289	2.98905e-47
YY1AP1	LINC02035	0.399786	8.73093e-16
DNAJB6	LINC02035	0.348686	3.92992e-12
SRC	LINC02035	0.365298	2.99764e-13
PML	LINC02035	0.472862	3.11703e-22
NF2	LINC02035	0.357905	9.59915e-13
CAV1	LINC02035	0.515566	8.73871e-27
ZNF419	LINC02035	0.385508	1.06464e-14
SLC2A6	LINC02035	0.345272	6.54691e-12
HRAS	ST7-AS1	0.432486	1.76978e-18
EGLN2	ST7-AS1	0.332944	3.9296e-11
HSPB1	ST7-AS1	0.493523	2.34988e-24
GPX2	AL391095.2	0.36922	1.59703e-13
NNMT	AL391095.2	0.38817	6.74062e-15
RPL8	EPB41L4A-AS1	0.482005	3.7341e-23
HRAS	EPB41L4A-AS1	0.306989	1.32725e-09
HSF1	EPB41L4A-AS1	0.359684	7.27392e-13
DUOX1	AL589765.4	0.327635	8.29799e-11
RPL8	SLCO4A1-AS1	0.357603	1.00597e-12
HRAS	SLCO4A1-AS1	0.429516	3.19766e-18
EGLN2	SLCO4A1-AS1	0.307008	1.32402e-09
HSPB1	SLCO4A1-AS1	0.544706	2.78683e-30
HRAS	POLR2J4	0.376933	4.51471e-14
EGLN2	POLR2J4	0.304292	1.87713e-09
HSPB1	POLR2J4	0.322231	1.75002e-10
G6PD	AC061992.1	0.319132	2.66713e-10
SLC38A1	AC061992.1	0.300417	3.06985e-09
SLC1A5	AC061992.1	0.46252	3.18709e-21
CDKN2A	AC061992.1	0.308692	1.06441e-09
PML	AC061992.1	0.354	1.75357e-12
NF2	AC061992.1	0.307609	1.2251e-09
ASNS	AC061992.1	0.537539	2.17139e-29
SLC7A5	AC061992.1	0.34931	3.57716e-12
AKR1C1	LINC02198	0.475947	1.53414e-22
AKR1C2	LINC02198	0.309346	9.77607e-10
AKR1C3	LINC02198	0.351836	2.4402e-12
NQO1	LINC02198	0.344398	7.45324e-12
TXNRD1	LINC02198	0.477661	1.03154e-22
SRXN1	LINC02198	0.425266	7.38031e-18
SLC1A5	FLJ46906	0.318893	2.7544e-10
EGLN2	FLJ46906	0.318078	3.07439e-10
DUOX1	AC022144.1	0.464706	1.96246e-21
TAZ	KC877982.1	0.426673	5.60311e-18
SLC2A1	AC022098.3	0.472604	3.30638e-22
STEAP3	AP001781.1	0.329298	6.57636e-11
BAP1	AL109917.1	0.326628	9.54676e-11
STMN1	AL109917.1	0.391229	3.96593e-15
EGLN2	AC084824.5	0.425195	7.48375e-18
MAPK3	AL139384.1	0.34222	1.02784e-11
CDKN2A	AL139384.1	0.348577	3.99489e-12
BAP1	AL139384.1	0.345629	6.20857e-12
YY1AP1	AL139384.1	0.309081	1.01187e-09
HELLS	AL139384.1	0.346787	5.22407e-12
STMN1	AL139384.1	0.42179	1.44997e-17
CS	AC009414.2	0.343036	9.11495e-12
ABCC1	AC009414.2	0.326516	9.69713e-11
G6PD	CASC9	0.329824	6.10819e-11
CS	AC012467.2	0.324554	1.2722e-10
NRAS	AC012467.2	0.364782	3.2543e-13
SLC38A1	AC012467.2	0.377401	4.17692e-14
MYB	AC012467.2	0.382527	1.76779e-14
FANCD2	AC012467.2	0.415508	4.81844e-17
HELLS	AC012467.2	0.468401	8.57928e-22
SRC	AC012467.2	0.321443	1.94891e-10
ZNF419	AC012467.2	0.371501	1.10299e-13
ZFP69B	AC012467.2	0.341007	1.22803e-11
G6PD	AC010542.5	0.343808	8.13283e-12
HRAS	AC010542.5	0.342844	9.37642e-12
SLC38A1	AC010542.5	0.324708	1.24547e-10
SLC1A5	AC010542.5	0.355901	1.30909e-12
MAPK3	AC010542.5	0.315691	4.23361e-10
CDKN2A	AC010542.5	0.353292	1.95444e-12
ABCC1	AC010542.5	0.318126	3.05469e-10
PML	AC010542.5	0.380479	2.4967e-14
SLC2A6	AC010542.5	0.305447	1.61888e-09
CAPG	AC010542.5	0.304282	1.87962e-09
FANCD2	LINC02562	0.385442	1.0768e-14
STMN1	LINC02562	0.326982	9.08841e-11
RPL8	AC008556.1	0.368775	1.71605e-13
EGLN2	AC008556.1	0.395196	1.97688e-15
HSF1	AC008556.1	0.305453	1.61776e-09
SLC2A14	AC008556.1	0.574154	3.52192e-34
STMN1	AC096711.1	0.323364	1.49843e-10
G6PD	LINC02561	0.419036	2.4622e-17
AKR1C2	LINC02561	0.305781	1.551e-09
AKR1C3	LINC02561	0.458363	7.93687e-21
SQSTM1	LINC02561	0.379132	3.1293e-14
NQO1	LINC02561	0.366372	2.52522e-13
TXNRD1	LINC02561	0.539952	1.09383e-29
SRXN1	LINC02561	0.407623	2.09994e-16
MAFG	LINC02561	0.36149	5.48003e-13
RPL8	RHPN1-AS1	0.411263	1.06948e-16
EMC2	RHPN1-AS1	0.323487	1.47339e-10
G6PD	RHPN1-AS1	0.309323	9.80563e-10
NRAS	RHPN1-AS1	0.306711	1.37584e-09
HSF1	RHPN1-AS1	0.520244	2.52783e-27
SRC	RHPN1-AS1	0.323337	1.50412e-10
ZFP69B	RHPN1-AS1	0.351924	2.4076e-12
MAFG	RHPN1-AS1	0.350709	2.89569e-12
RPL8	SNHG17	0.596247	2.25401e-37
HRAS	SNHG17	0.422792	1.19462e-17
SLC1A5	SNHG17	0.314705	4.82782e-10
EGLN2	SNHG17	0.456505	1.18861e-20
HSPB1	SNHG17	0.415476	4.84782e-17
HSF1	SNHG17	0.450475	4.33343e-20
ALB	SNHG17	-0.313255	5.8518e-10
ALOX15B	AC073257.2	0.302891	2.24441e-09
RRM2	AL358394.1	0.336396	2.39824e-11
AIFM2	AL353803.5	0.372369	9.57304e-14
TFRC	AL035446.1	0.312912	6.12337e-10
SLC1A5	AL035446.1	0.510836	3.00493e-26
PML	AL035446.1	0.32059	2.18882e-10
ASNS	AL035446.1	0.340699	1.28466e-11
SLC7A5	AL035446.1	0.351226	2.67729e-12
RPL8	AC016405.3	0.606443	6.22315e-39
HRAS	AC016405.3	0.456975	1.07338e-20
HSPB1	AC016405.3	0.532946	7.89125e-29
HSF1	AC016405.3	0.355622	1.36668e-12
CS	NRAV	0.56824	2.29765e-33
G6PD	NRAV	0.411022	1.11865e-16
NRAS	NRAV	0.453467	2.28807e-20
TFRC	NRAV	0.429347	3.30699e-18
SLC38A1	NRAV	0.60528	9.43491e-39
SLC1A5	NRAV	0.358369	8.92999e-13
ALOX12	NRAV	0.389736	5.14137e-15
MAPK3	NRAV	0.484902	1.88057e-23
CDKN2A	NRAV	0.315967	4.08048e-10
ABCC1	NRAV	0.651006	1.8478e-46
YY1AP1	NRAV	0.336662	2.30787e-11
DNAJB6	NRAV	0.392531	3.15884e-15
FANCD2	NRAV	0.481565	4.14165e-23
SRC	NRAV	0.455157	1.59067e-20
PML	NRAV	0.437181	6.86515e-19
NF2	NRAV	0.352969	2.05326e-12
CAV1	NRAV	0.407122	2.30291e-16
NCF2	NRAV	0.301023	2.84385e-09
ALB	NRAV	-0.332317	4.29553e-11
ASNS	NRAV	0.341813	1.09112e-11
ZFP69B	NRAV	0.424236	9.02333e-18
MAFG	NRAV	0.382132	1.88972e-14
SLC2A1	NRAV	0.308673	1.06708e-09
SLC2A6	NRAV	0.339275	1.58116e-11
STMN1	NRAV	0.398826	1.03692e-15
RRM2	NRAV	0.338059	1.8862e-11
ZNF419	SNHG27	0.34026	1.3697e-11
DUOX1	AC009120.2	0.39558	1.84721e-15
SLC38A1	AC009120.2	0.375262	5.95264e-14
ALOX12	AC009120.2	0.450895	3.96368e-20
ABCC1	AC009120.2	0.500696	3.97836e-25
CAV1	AC009120.2	0.351404	2.60565e-12
ZNF419	AC009120.2	0.355058	1.49063e-12
CDKN2A	LINC01268	0.373157	8.41499e-14
BAP1	LINC01268	0.300151	3.17448e-09
FANCD2	LINC01268	0.434759	1.12114e-18
HELLS	LINC01268	0.387543	7.5099e-15
STMN1	LINC01268	0.309502	9.5795e-10
PRKAA2	AC062015.1	0.311827	7.06413e-10
PRKAA2	SIAH2-AS1	0.376626	4.75008e-14
AKR1C2	SIAH2-AS1	0.415608	4.72842e-17
SLC1A5	AC245884.9	0.350223	3.11634e-12
TAZ	AC245884.9	0.389659	5.21032e-15
DRD4	AC245884.9	0.509551	4.18886e-26
SLC38A1	AL691482.3	0.310147	8.80572e-10
SRC	AL691482.3	0.414928	5.37636e-17
PTGS2	AL691482.3	0.656305	1.932e-47
STMN1	DSCR8	0.337457	2.05771e-11
DUOX1	AC132872.3	0.35641	1.21016e-12
SLC38A1	AC132872.3	0.394693	2.16061e-15
ALOX12	AC132872.3	0.40253	5.32414e-16
ABCC1	AC132872.3	0.307841	1.18872e-09
FANCD2	AC132872.3	0.395404	1.90554e-15
HELLS	AC132872.3	0.338622	1.73843e-11
ZNF419	AC132872.3	0.302916	2.23725e-09
MAFG	AC132872.3	0.352706	2.13719e-12
NRAS	LINC00346	0.356613	1.17268e-12
RPL8	AC117498.2	0.302955	2.22626e-09
SLC38A1	LINC01963	0.307595	1.22733e-09
DNAJB6	LINC01963	0.390428	4.55905e-15
HRAS	AC020765.2	0.423717	9.98178e-18
MAPK3	AC020765.2	0.310312	8.61781e-10
EGLN2	AC020765.2	0.357971	9.50056e-13
HSPB1	AC020765.2	0.323545	1.46178e-10
SLC2A1	AC020765.2	0.329605	6.29873e-11
CS	AL354836.1	0.390353	4.61851e-15
SLC38A1	AL354836.1	0.367168	2.22255e-13
SLC1A5	AL354836.1	0.323674	1.43594e-10
ALOX12	AL354836.1	0.410669	1.19459e-16
MAPK3	AL354836.1	0.307583	1.22911e-09
ABCC1	AL354836.1	0.537002	2.52773e-29
DNAJB6	AL354836.1	0.300589	3.00387e-09
SRC	AL354836.1	0.310974	7.90144e-10
PML	AL354836.1	0.374707	6.52355e-14
CAV1	AL354836.1	0.497569	8.67344e-25
ZNF419	AL354836.1	0.33125	4.99613e-11
SLC2A6	AL354836.1	0.345386	6.43649e-12
FANCD2	LINC02315	0.42316	1.11229e-17
STMN1	LINC02315	0.430775	2.4902e-18
ZNF419	ZNF667-AS1	0.533859	6.11429e-29
GLS2	AJ009632.2	0.346315	5.60502e-12
HSPB1	LINC01315	0.308287	1.12197e-09
NF2	LINC01315	0.315352	4.42963e-10
RPL8	AC131009.3	0.460525	4.94644e-21
HRAS	AC131009.3	0.564083	8.39553e-33
EGLN2	AC131009.3	0.495399	1.48265e-24
HSPB1	AC131009.3	0.628759	1.50491e-42
GPX2	AC131009.3	0.332712	4.06121e-11
SLC38A1	MUC20-OT1	0.335555	2.70632e-11
HELLS	MUC20-OT1	0.341795	1.09413e-11
ZNF419	MUC20-OT1	0.311393	7.47889e-10
SLC2A6	MUC20-OT1	0.33172	4.67446e-11
DUOX1	CCDC18-AS1	0.339462	1.53857e-11
NRAS	CCDC18-AS1	0.413881	6.55004e-17
SLC38A1	CCDC18-AS1	0.377329	4.22734e-14
ALOX12	CCDC18-AS1	0.379913	2.74588e-14
FANCD2	CCDC18-AS1	0.387936	7.01816e-15
HELLS	CCDC18-AS1	0.30972	9.31094e-10
SRC	CCDC18-AS1	0.329889	6.05211e-11
ZNF419	CCDC18-AS1	0.359583	7.39036e-13
MAFG	CCDC18-AS1	0.337008	2.19568e-11
AKR1C1	LINC01564	0.42267	1.22304e-17
AKR1C2	LINC01564	0.371793	1.05173e-13
FTL	LINC01564	0.330544	5.51963e-11
CS	SOX21-AS1	0.307375	1.26275e-09
ATF3	AC005180.2	0.30915	1.00286e-09
EGLN2	AC104113.1	0.352632	2.16174e-12
ZNF419	AC104113.1	0.327447	8.51917e-11
PRKAA2	LINC01484	0.39783	1.23877e-15
AKR1C2	LINC01484	0.382269	1.84665e-14
MAFG	LINC01484	0.321413	1.95693e-10
STEAP3	AC104411.1	0.316307	3.89913e-10
CS	TMEM147-AS1	0.306918	1.33954e-09
DUOX1	TMEM147-AS1	0.355094	1.48252e-12
ALOX12	TMEM147-AS1	0.488512	7.92802e-24
FANCD2	TMEM147-AS1	0.363032	4.29645e-13
HELLS	TMEM147-AS1	0.402094	5.76136e-16
SLC2A14	TMEM147-AS1	0.313961	5.32951e-10
TP63	LINC01697	0.513765	1.40181e-26
SLC38A1	AC010336.2	-0.321592	1.90978e-10
SLC2A6	AC010336.2	-0.326359	9.9111e-11
HRAS	AL023284.4	0.304789	1.76139e-09
NRAS	AC096536.2	0.311975	6.92866e-10
ABCC1	AC096536.2	0.323859	1.40001e-10
TXNRD1	AC096536.2	0.303069	2.19414e-09
SRXN1	AC096536.2	0.302627	2.32102e-09
MAFG	AC096536.2	0.322406	1.70882e-10
SLC38A1	AP003171.1	0.384913	1.17854e-14
DDIT3	AP003171.1	0.524038	9.11192e-28
DRD4	AP003171.1	0.379563	2.91163e-14
SLC2A6	AP003171.1	0.482569	3.26928e-23
SLC38A1	AC087482.1	-0.327188	8.83195e-11
AKR1C2	AC087482.1	0.32535	1.13976e-10
TUBE1	AC012379.1	0.325931	1.0516e-10
GLS2	LINC02160	0.418622	2.66535e-17
RPL8	ZNF529-AS1	0.39048	4.51783e-15
CS	ZNF529-AS1	0.343267	8.81001e-12
HRAS	ZNF529-AS1	0.428879	3.62763e-18
SLC38A1	ZNF529-AS1	0.313075	5.99269e-10
SLC1A5	ZNF529-AS1	0.318731	2.81526e-10
MAPK3	ZNF529-AS1	0.378193	3.66091e-14
CDKN2A	ZNF529-AS1	0.339805	1.46354e-11
MYB	ZNF529-AS1	0.312683	6.31114e-10
EGLN2	ZNF529-AS1	0.545602	2.14859e-30
HSF1	ZNF529-AS1	0.385725	1.02593e-14
FANCD2	ZNF529-AS1	0.402562	5.29287e-16
HELLS	ZNF529-AS1	0.342455	9.92968e-12
NF2	ZNF529-AS1	0.353527	1.88522e-12
ASNS	ZNF529-AS1	0.33433	3.2254e-11
DDIT3	ZNF529-AS1	0.315113	4.57324e-10
ZNF419	ZNF529-AS1	0.52098	2.07593e-27
STEAP3	ZNF529-AS1	-0.338389	1.79802e-11
SLC2A14	ZNF529-AS1	0.301724	2.60275e-09
STMN1	ZNF529-AS1	0.422396	1.2898e-17
G6PD	LINC01004	0.335727	2.64042e-11
SLC38A1	LINC01004	0.383093	1.60628e-14
SLC1A5	LINC01004	0.345606	6.2299e-12
ALOX12	LINC01004	0.309473	9.61559e-10
ABCC1	LINC01004	0.424457	8.64202e-18
DNAJB6	LINC01004	0.369654	1.4889e-13
FANCD2	LINC01004	0.387164	8.01506e-15
SRC	LINC01004	0.327469	8.49241e-11
PML	LINC01004	0.323594	1.45198e-10
NF2	LINC01004	0.365455	2.92342e-13
CAV1	LINC01004	0.317076	3.51774e-10
ASNS	LINC01004	0.3399	1.4436e-11
SLC7A5	LINC01004	0.37361	7.81251e-14
ZNF419	LINC01004	0.335462	2.7427e-11
MAFG	LINC01004	0.33386	3.4491e-11
DRD4	LINC01004	0.427474	4.78679e-18
SLC2A6	LINC01004	0.403663	4.33465e-16
SLC38A1	AC003102.1	0.322959	1.58401e-10
ALOX12	AC003102.1	0.342105	1.04542e-11
MAPK3	AC003102.1	0.322385	1.71366e-10
FANCD2	AC003102.1	0.332963	3.91923e-11
ZNF419	AC003102.1	0.356256	1.23933e-12
STMN1	AC003102.1	0.327304	8.68995e-11
HRAS	AL355338.1	0.32862	7.23192e-11
CDKN2A	AL355338.1	0.331121	5.0879e-11
SLC2A6	AL355338.1	0.32065	2.17118e-10
STMN1	AL355338.1	0.366126	2.62655e-13
G6PD	AC138207.5	0.37282	8.89243e-14
SLC1A5	AC138207.5	0.498966	6.13005e-25
MAPK3	AC138207.5	0.397411	1.33477e-15
ABCC1	AC138207.5	0.314835	4.7453e-10
DNAJB6	AC138207.5	0.340169	1.38802e-11
PML	AC138207.5	0.600558	5.0204e-38
NF2	AC138207.5	0.399517	9.16144e-16
CAV1	AC138207.5	0.481029	4.69714e-23
NCF2	AC138207.5	0.331982	4.50436e-11
CAPG	AC138207.5	0.443623	1.82726e-19
RPL8	AC103706.1	0.458137	8.33863e-21
HRAS	AC103706.1	0.396895	1.46302e-15
EGLN2	AC103706.1	0.355559	1.37991e-12
AKR1C3	AC103706.1	0.32066	2.16813e-10
HSPB1	AC103706.1	0.393182	2.81844e-15
HSF1	AC103706.1	0.363874	3.75976e-13
NQO1	AC103706.1	0.316923	3.59058e-10
FTL	AC103706.1	0.304937	1.72833e-09
MAPK3	AL391244.3	0.323826	1.40634e-10
CDKN2A	AL391244.3	0.300829	2.91433e-09
MYB	AL391244.3	0.32601	1.04016e-10
TAZ	AL391244.3	0.366026	2.66872e-13
FANCD2	AL391244.3	0.347579	4.64028e-12
STMN1	AL391244.3	0.343233	8.85422e-12
ALOX12	AL135999.1	0.329435	6.45092e-11
ZNF419	AL135999.1	0.338551	1.75646e-11
HAMP	FAM83A-AS1	0.337777	1.96482e-11
NNMT	FAM83A-AS1	0.444209	1.61788e-19
ALOX12	ZNF213-AS1	0.361061	5.86244e-13
MAPK3	ZNF213-AS1	0.363748	3.83546e-13
FANCD2	ZNF213-AS1	0.360733	6.17141e-13
ZNF419	ZNF213-AS1	0.306582	1.39891e-09
STMN1	ZNF213-AS1	0.365765	2.78229e-13
NF2	DGCR11	0.314732	4.81052e-10
FANCD2	AP005482.3	0.378474	3.49312e-14
HELLS	AP005482.3	0.480844	4.90623e-23
ZNF419	AP005482.3	0.3401	1.4021e-11
STMN1	AP005482.3	0.383446	1.51273e-14
CS	AC004264.1	0.360132	6.78186e-13
SLC38A1	AC004264.1	0.402077	5.77831e-16
DUOX1	LHFPL3-AS2	0.362638	4.57271e-13
SLC38A1	LHFPL3-AS2	0.370933	1.20974e-13
SLC1A5	LHFPL3-AS2	0.328035	7.84829e-11
ALOX12	LHFPL3-AS2	0.307162	1.29804e-09
ABCC1	LHFPL3-AS2	0.37599	5.27815e-14
CAV1	LHFPL3-AS2	0.304264	1.88397e-09
ZNF419	LHFPL3-AS2	0.383855	1.41127e-14
NRAS	LINC00958	0.313499	5.66553e-10
CS	AC093001.1	0.3287	7.15087e-11
DUOX1	AC018904.1	0.392375	3.24637e-15
SLC38A1	AC018904.1	0.480421	5.41781e-23
SLC1A5	AC018904.1	0.406813	2.43733e-16
ABCC1	AC018904.1	0.386661	8.73895e-15
YY1AP1	AC018904.1	0.327771	8.14248e-11
FANCD2	AC018904.1	0.375015	6.2009e-14
SRC	AC018904.1	0.428485	3.92143e-18
PML	AC018904.1	0.456008	1.32352e-20
NF2	AC018904.1	0.493532	2.34452e-24
CAV1	AC018904.1	0.369881	1.43505e-13
ASNS	AC018904.1	0.334928	2.9608e-11
ZNF419	AC018904.1	0.376186	5.10974e-14
SLC2A6	AC018904.1	0.400518	7.65461e-16
CS	AC009549.1	0.468817	7.81099e-22
TFRC	AC009549.1	0.337898	1.93056e-11
SLC38A1	AC009549.1	0.392347	3.26208e-15
SLC1A5	AC009549.1	0.321337	1.9773e-10
ABCC1	AC009549.1	0.391922	3.51389e-15
PML	AC009549.1	0.380777	2.37501e-14
CAV1	AC009549.1	0.376716	4.68039e-14
YY1AP1	AP001318.2	0.416316	4.13439e-17
HELLS	AP001318.2	0.323809	1.40958e-10
CS	AC010326.3	0.32214	1.7719e-10
DUOX1	AC010326.3	0.322073	1.78838e-10
SLC38A1	AC010326.3	0.420249	1.95148e-17
SLC1A5	AC010326.3	0.355234	1.45079e-12
MYB	AC010326.3	0.350703	2.89809e-12
FANCD2	AC010326.3	0.347576	4.64195e-12
HELLS	AC010326.3	0.367287	2.18074e-13
SRC	AC010326.3	0.455907	1.35294e-20
NF2	AC010326.3	0.419543	2.23434e-17
ASNS	AC010326.3	0.303792	2.00096e-09
ZNF419	AC010326.3	0.600063	5.97102e-38
SLC2A6	AC010326.3	0.319522	2.5298e-10
SLC38A1	AL390728.6	0.393942	2.46617e-15
YY1AP1	AL390728.6	0.379972	2.71876e-14
FANCD2	AL390728.6	0.459914	5.65492e-21
HELLS	AL390728.6	0.359425	7.57478e-13
DDIT3	AL390728.6	0.378652	3.39097e-14
ZNF419	AL390728.6	0.464919	1.87162e-21
DRD4	AL390728.6	0.325605	1.10022e-10
SLC2A6	AL390728.6	0.391687	3.66121e-15
STMN1	AL390728.6	0.343917	8.00314e-12
HRAS	LINC02001	0.439542	4.23985e-19
SLC1A5	LINC02001	0.312664	6.32665e-10
MAPK3	LINC02001	0.339268	1.58268e-11
CDKN2A	LINC02001	0.393971	2.45343e-15
EGLN2	LINC02001	0.412945	7.80783e-17
FANCD2	LINC02001	0.38581	1.01107e-14
HELLS	LINC02001	0.380989	2.29162e-14
NF2	LINC02001	0.317461	3.34029e-10
ZNF419	LINC02001	0.387624	7.40549e-15
STMN1	LINC02001	0.490305	5.14319e-24
RRM2	LINC02001	0.330485	5.5651e-11
AURKA	LINC02001	0.314905	4.70125e-10
G6PD	AC108676.1	0.302993	2.21541e-09
NRAS	AC108676.1	0.32081	2.12428e-10
ABCC1	AC108676.1	0.380969	2.29934e-14
PML	AC108676.1	0.305421	1.62443e-09
RPL8	AL035071.1	0.414063	6.32942e-17
HRAS	AL035071.1	0.380209	2.61258e-14
SLC1A5	AL035071.1	0.383777	1.43008e-14
MYB	AL035071.1	0.337097	2.16776e-11
EGLN2	AL035071.1	0.452911	2.57734e-20
DNAJB6	AL035071.1	0.314071	5.25244e-10
HSF1	AL035071.1	0.38939	5.45934e-15
FANCD2	AL035071.1	0.349177	3.64942e-12
SRC	AL035071.1	0.348062	4.31583e-12
NF2	AL035071.1	0.416058	4.34202e-17
ASNS	AL035071.1	0.304374	1.85761e-09
ZNF419	AL035071.1	0.343436	8.59342e-12
SLC2A6	AL035071.1	0.320232	2.29777e-10
SLC2A14	AL035071.1	0.410535	1.22471e-16
STMN1	AL035071.1	0.344964	6.85375e-12
G6PD	AL031985.3	0.389339	5.50728e-15
NRAS	AL031985.3	0.538279	1.76104e-29
TFRC	AL031985.3	0.316908	3.59794e-10
SLC38A1	AL031985.3	0.360023	6.89781e-13
SLC1A5	AL031985.3	0.395992	1.71716e-15
MAPK3	AL031985.3	0.347268	4.8612e-12
MYB	AL031985.3	0.35844	8.83193e-13
ABCC1	AL031985.3	0.334999	2.93094e-11
YY1AP1	AL031985.3	0.310074	8.89028e-10
DNAJB6	AL031985.3	0.471018	4.74528e-22
FANCD2	AL031985.3	0.444384	1.55984e-19
HELLS	AL031985.3	0.357534	1.0167e-12
SRC	AL031985.3	0.317122	3.49588e-10
PML	AL031985.3	0.359107	7.96054e-13
NF2	AL031985.3	0.36694	2.30565e-13
NCF2	AL031985.3	0.405967	2.8465e-16
ASNS	AL031985.3	0.374222	7.06506e-14
SLC1A4	AL031985.3	0.340259	1.3699e-11
ZNF419	AL031985.3	0.328381	7.47794e-11
ZFP69B	AL031985.3	0.847855	1.5403e-104
MAFG	AL031985.3	0.382745	1.7038e-14
SLC2A1	AL031985.3	0.307365	1.26427e-09
STMN1	AL031985.3	0.446488	1.00505e-19
RRM2	AL031985.3	0.389126	5.71465e-15
RPL8	AC245595.1	0.441194	3.01965e-19
G6PD	AC245595.1	0.372851	8.84717e-14
HRAS	AC245595.1	0.35243	2.22911e-12
SLC1A5	AC245595.1	0.338307	1.81978e-11
MAPK3	AC245595.1	0.33057	5.49886e-11
CDKN2A	AC245595.1	0.337839	1.94729e-11
HSF1	AC245595.1	0.467519	1.0464e-21
FANCD2	AC245595.1	0.332934	3.93487e-11
ASNS	AC245595.1	0.405854	2.90627e-16
ZFP69B	AC245595.1	0.326149	1.02031e-10
RPL8	MIR4458HG	0.310753	8.13387e-10
HRAS	MIR4458HG	0.373087	8.51255e-14
EGLN2	MIR4458HG	0.450805	4.04017e-20
RPL8	AC091153.3	0.334358	3.21222e-11
HRAS	AC091153.3	0.361928	5.11441e-13
EGLN2	AC091153.3	0.308405	1.10485e-09
AKR1C3	AC091153.3	0.314377	5.04333e-10
HSPB1	AC091153.3	0.335332	2.79417e-11
HSF1	AC091153.3	0.326178	1.01627e-10
AIFM2	AC091153.3	0.300835	2.91231e-09
FTL	AC091153.3	0.322291	1.73578e-10
GLS2	AC243836.1	0.390253	4.70016e-15
NRAS	AC068756.1	0.349224	3.62388e-12
BAP1	AC068756.1	0.307522	1.23888e-09
FANCD2	AC068756.1	0.516267	7.26675e-27
ZFP69B	AC068756.1	0.347842	4.46077e-12
STMN1	AC068756.1	0.435317	1.00164e-18
RRM2	AC068756.1	0.408324	1.84515e-16
AURKA	AC068756.1	0.301446	2.69578e-09
AKR1C2	AL359962.2	0.329494	6.3977e-11
TXNRD1	LINC02015	0.317831	3.17832e-10
AKR1C2	AC110741.1	0.320809	2.12448e-10
AKR1C3	AC110741.1	0.340927	1.24238e-11
RPL8	CHKB-DT	0.439984	3.87254e-19
HRAS	CHKB-DT	0.361533	5.44269e-13
EGLN2	CHKB-DT	0.365455	2.92358e-13
HSPB1	CHKB-DT	0.306053	1.49759e-09
HSF1	CHKB-DT	0.43074	2.50755e-18
GLS2	LINC01127	0.309393	9.71608e-10
HSF1	LINC01127	-0.30499	1.7166e-09
STEAP3	LINC01127	0.369252	1.58881e-13
RPL8	FREM2-AS1	0.378984	3.2077e-14
EGLN2	FREM2-AS1	0.388183	6.72596e-15
HSF1	FREM2-AS1	0.314428	5.0094e-10
SLC2A14	FREM2-AS1	0.619455	5.25582e-41
RPL8	AC008915.2	0.480639	5.14813e-23
HRAS	AC008915.2	0.525643	5.89482e-28
EGLN2	AC008915.2	0.55933	3.61243e-32
HSPB1	AC008915.2	0.464009	2.29177e-21
HSF1	AC008915.2	0.389931	4.9702e-15
FTL	AC008915.2	0.321354	1.97271e-10
HELLS	AL355096.1	0.37883	3.29146e-14
ABCC1	AC079779.2	0.547358	1.28756e-30
SLC2A1	AC090204.1	0.315792	4.17709e-10
ZNF419	LINC01203	0.387301	7.82887e-15
MT1G	AC026461.2	0.803856	6.06597e-86
SLC1A5	LINC00601	0.441105	3.07601e-19
ASNS	LINC00601	0.318288	2.98866e-10
SLC7A5	LINC00601	0.436661	7.62949e-19
RPL8	AC007938.3	0.384613	1.24051e-14
EGLN2	AC007938.3	0.39611	1.68169e-15
HSF1	AC007938.3	0.325154	1.17107e-10
SLC2A14	AC007938.3	0.61769	1.0176e-40
CS	AC005288.1	0.530087	1.74389e-28
NRAS	AC005288.1	0.603464	1.79997e-38
TFRC	AC005288.1	0.403477	4.48376e-16
SLC38A1	AC005288.1	0.467736	9.96525e-22
ALOX12	AC005288.1	0.521235	1.93917e-27
PRKAA2	AC005288.1	0.344775	7.0482e-12
ABCC1	AC005288.1	0.480632	5.15617e-23
YY1AP1	AC005288.1	0.474681	2.05415e-22
DNAJB6	AC005288.1	0.390267	4.68873e-15
FANCD2	AC005288.1	0.420768	1.76582e-17
HELLS	AC005288.1	0.33687	2.23968e-11
SRC	AC005288.1	0.393968	2.45477e-15
PML	AC005288.1	0.418562	2.69598e-17
NF2	AC005288.1	0.309404	9.7019e-10
CAV1	AC005288.1	0.366105	2.63522e-13
NCF2	AC005288.1	0.314682	4.84274e-10
ZFP69B	AC005288.1	0.539609	1.20632e-29
MAFG	AC005288.1	0.462928	2.91224e-21
RRM2	AC005288.1	0.34225	1.02328e-11
NRAS	AC012313.1	0.375355	5.86215e-14
ALOX12	AC012313.1	0.374141	7.16009e-14
PRKAA2	AC012313.1	0.346851	5.17395e-12
FANCD2	AC012313.1	0.307283	1.2779e-09
ZFP69B	AC012313.1	0.320413	2.24201e-10
MAFG	AC012313.1	0.329463	6.4255e-11
NRAS	GASAL1	0.309707	9.32587e-10
FANCD2	GASAL1	0.310778	8.10751e-10
ZFP69B	GASAL1	0.329267	6.60489e-11
RRM2	GASAL1	0.333545	3.60746e-11
HSPB1	LINC02490	0.325105	1.17894e-10
G6PD	TMEM220-AS1	-0.308613	1.07544e-09
HRAS	TMEM220-AS1	-0.358888	8.2367e-13
SLC38A1	TMEM220-AS1	-0.383128	1.59663e-14
SLC1A5	TMEM220-AS1	-0.304733	1.77408e-09
GLS2	TMEM220-AS1	0.344123	7.76275e-12
MAPK3	TMEM220-AS1	-0.415883	4.48854e-17
ABCC1	TMEM220-AS1	-0.338319	1.8164e-11
HSF1	TMEM220-AS1	-0.34384	8.09509e-12
FANCD2	TMEM220-AS1	-0.324646	1.25609e-10
PML	TMEM220-AS1	-0.331689	4.69515e-11
NCF2	TMEM220-AS1	-0.307832	1.19021e-09
ASNS	TMEM220-AS1	-0.321411	1.95734e-10
MAFG	TMEM220-AS1	-0.358555	8.67521e-13
STMN1	TMEM220-AS1	-0.321913	1.82787e-10
RRM2	TMEM220-AS1	-0.307869	1.18452e-09
TFRC	AC027031.2	0.385093	1.14291e-14
SLC1A5	AC027031.2	0.612542	6.82635e-40
DNAJB6	AC027031.2	0.350434	3.01883e-12
PML	AC027031.2	0.4688	7.84232e-22
NF2	AC027031.2	0.418777	2.58745e-17
CAV1	AC027031.2	0.384148	1.34273e-14
ASNS	AC027031.2	0.457814	8.94549e-21
SLC7A5	AC027031.2	0.458952	6.98017e-21
SLC2A1	AC027031.2	0.302429	2.38026e-09
CS	AC007406.5	0.464808	1.91853e-21
DUOX1	AC007406.5	0.306222	1.4654e-09
NRAS	AC007406.5	0.401293	6.65773e-16
SLC38A1	AC007406.5	0.344106	7.78218e-12
ALOX12	AC007406.5	0.528345	2.81699e-28
MYB	AC007406.5	0.310429	8.48625e-10
PRKAA2	AC007406.5	0.331103	5.10056e-11
ABCC1	AC007406.5	0.37222	9.80887e-14
YY1AP1	AC007406.5	0.422663	1.22481e-17
DNAJB6	AC007406.5	0.302448	2.37448e-09
FANCD2	AC007406.5	0.382119	1.89396e-14
HELLS	AC007406.5	0.399575	9.06799e-16
SRC	AC007406.5	0.432336	1.82381e-18
CAV1	AC007406.5	0.34877	3.88051e-12
ZNF419	AC007406.5	0.405739	2.96817e-16
ZFP69B	AC007406.5	0.344588	7.2467e-12
CS	LINC02298	0.468755	7.9225e-22
SLC38A1	LINC02298	0.389812	5.07361e-15
ABCC1	LINC02298	0.350609	2.9396e-12
HSPB1	LINC02298	0.30927	9.87345e-10
HSF1	LINC02298	0.308106	1.14864e-09
AKR1C2	LINC00467	0.351181	2.69548e-12
GPX2	LINC00467	0.315909	4.11219e-10
NCF2	LINC02244	0.348773	3.87834e-12
CAPG	LINC02244	0.340804	1.2651e-11
CS	AP000695.2	0.366948	2.30236e-13
SLC38A1	AP000695.2	0.322796	1.61996e-10
NCF2	AC037198.1	0.338028	1.89477e-11
DUOX1	AL590560.1	0.304197	1.90014e-09
ABCC1	AL590560.1	0.3381	1.87504e-11
SRC	AL590560.1	0.309168	1.0005e-09
PML	AL590560.1	0.351753	2.47104e-12
ALOX12	AL928654.2	0.456404	1.21489e-20
HELLS	AL928654.2	0.302046	2.49861e-09
ZNF419	AL928654.2	0.30069	2.96609e-09
AKR1C2	AC007114.1	0.30352	2.07162e-09
CAPG	AC243960.1	0.32393	1.38644e-10
G6PD	LINC01184	0.331985	4.50259e-11
ABCC1	LINC01184	0.339851	1.4538e-11
CAV1	LINC01184	0.339873	1.44923e-11
DUOX1	AL355488.1	0.427636	4.63579e-18
NRAS	AL355488.1	0.390526	4.48203e-15
SLC38A1	AL355488.1	0.448354	6.78851e-20
ALOX12	AL355488.1	0.374198	7.09388e-14
CDKN2A	AL355488.1	0.311145	7.72613e-10
MYB	AL355488.1	0.402516	5.33702e-16
ABCC1	AL355488.1	0.369676	1.48361e-13
YY1AP1	AL355488.1	0.385089	1.14366e-14
FANCD2	AL355488.1	0.545333	2.3236e-30
HELLS	AL355488.1	0.506583	8.97332e-26
SRC	AL355488.1	0.332577	4.13964e-11
NF2	AL355488.1	0.33236	4.26937e-11
ASNS	AL355488.1	0.305343	1.64065e-09
ZNF419	AL355488.1	0.444636	1.48005e-19
SLC2A6	AL355488.1	0.360183	6.72757e-13
STMN1	AL355488.1	0.379221	3.08317e-14
RRM2	AL355488.1	0.308789	1.05112e-09
RPL8	AP003419.3	0.306709	1.37621e-09
HRAS	AP003419.3	0.504215	1.63925e-25
ABCC1	AP003419.3	0.300696	2.96386e-09
EGLN2	AP003419.3	0.432067	1.92458e-18
TAZ	AP003419.3	0.308984	1.02485e-09
HSPB1	AP003419.3	0.429024	3.52484e-18
NRAS	AL050341.2	0.386132	9.56851e-15
ALOX12	AL050341.2	0.390478	4.51997e-15
MAPK3	AL050341.2	0.314459	4.98826e-10
MYB	AL050341.2	0.306912	1.34061e-09
FANCD2	AL050341.2	0.512931	1.74311e-26
HELLS	AL050341.2	0.395716	1.80323e-15
ZNF419	AL050341.2	0.415518	4.80912e-17
ZFP69B	AL050341.2	0.390589	4.43323e-15
SLC2A1	AL050341.2	0.302773	2.27835e-09
STMN1	AL050341.2	0.52796	3.13133e-28
DUOX1	AC127024.5	0.392849	2.988e-15
SLC38A1	AC127024.5	0.372676	9.10509e-14
SLC1A5	AC127024.5	0.355038	1.49535e-12
MYB	AC127024.5	0.369899	1.43099e-13
ABCC1	AC127024.5	0.325351	1.13956e-10
YY1AP1	AC127024.5	0.473858	2.48139e-22
EGLN2	AC127024.5	0.306726	1.37319e-09
FANCD2	AC127024.5	0.510902	2.95383e-26
HELLS	AC127024.5	0.494754	1.73783e-24
SRC	AC127024.5	0.367344	2.16056e-13
NF2	AC127024.5	0.443476	1.88379e-19
ASNS	AC127024.5	0.325657	1.09241e-10
DDIT3	AC127024.5	0.302257	2.43279e-09
ZNF419	AC127024.5	0.52576	5.71141e-28
SLC2A6	AC127024.5	0.433949	1.31972e-18
STMN1	AC127024.5	0.40091	7.13301e-16
RPL8	GPRC5D-AS1	0.354414	1.64573e-12
CS	GPRC5D-AS1	0.416273	4.16832e-17
HRAS	GPRC5D-AS1	0.333523	3.61899e-11
MAPK3	GPRC5D-AS1	0.331284	4.97202e-11
ABCC1	GPRC5D-AS1	0.371581	1.08871e-13
HSF1	GPRC5D-AS1	0.341595	1.12671e-11
SRC	GPRC5D-AS1	0.36791	1.97276e-13
ALB	GPRC5D-AS1	-0.325353	1.13923e-10
ZNF419	GPRC5D-AS1	0.309204	9.95902e-10
RPL8	AC148476.1	0.329824	6.10766e-11
EGLN2	AC148476.1	0.328408	7.44904e-11
SLC2A14	AC148476.1	0.477266	1.13063e-22
CS	AC135050.6	0.318206	3.02191e-10
MAPK3	AC135050.6	0.372292	9.69411e-14
TAZ	AC135050.6	0.301577	2.65139e-09
SRC	AC135050.6	0.300091	3.19866e-09
RPL8	AL035461.2	0.325886	1.05828e-10
HRAS	AL035461.2	0.399237	9.63359e-16
SLC1A5	AL035461.2	0.538322	1.7396e-29
MAPK3	AL035461.2	0.344018	7.8847e-12
CDKN2A	AL035461.2	0.493816	2.18741e-24
MYB	AL035461.2	0.433114	1.56068e-18
EGLN2	AL035461.2	0.532516	8.8938e-29
FANCD2	AL035461.2	0.54009	1.05166e-29
HELLS	AL035461.2	0.482852	3.05748e-23
NF2	AL035461.2	0.525459	6.19845e-28
ASNS	AL035461.2	0.355981	1.293e-12
ZNF419	AL035461.2	0.309412	9.6923e-10
SLC2A6	AL035461.2	0.356432	1.206e-12
STMN1	AL035461.2	0.583747	1.54867e-35
RRM2	AL035461.2	0.426493	5.80478e-18
AURKA	AL035461.2	0.43003	2.88797e-18
MYB	TNFRSF14-AS1	0.316222	3.94409e-10
SLC2A6	TNFRSF14-AS1	0.32128	1.99253e-10
AKR1C1	AP003119.2	0.33769	1.98978e-11
AKR1C2	AP003119.2	0.385434	1.07824e-14
HRAS	AC106820.3	0.368021	1.93799e-13
ALOX15B	AC106820.3	0.311894	7.00216e-10
MAPK3	AC106820.3	0.363872	3.76123e-13
CDKN2A	AC106820.3	0.339419	1.54822e-11
FANCD2	AC106820.3	0.311509	7.36557e-10
STMN1	AC106820.3	0.469103	7.32396e-22
DUOX1	AC090589.3	0.303034	2.20403e-09
ALOX12	AC090589.3	0.413165	7.49252e-17
YY1AP1	AC090589.3	0.317986	3.11277e-10
FANCD2	AC090589.3	0.326525	9.68508e-11
HELLS	AC090589.3	0.40595	2.85525e-16
ZNF419	AC090589.3	0.336362	2.40982e-11
MAPK3	AC016710.1	0.32764	8.29294e-11
AKR1C3	AC016710.1	0.309639	9.40983e-10
FANCD2	AC016710.1	0.376593	4.77659e-14
STMN1	AC016710.1	0.345404	6.41957e-12
RRM2	AC016710.1	0.345558	6.27429e-12
RPL8	MAPKAPK5-AS1	0.492637	2.91796e-24
CS	MAPKAPK5-AS1	0.338683	1.72311e-11
G6PD	MAPKAPK5-AS1	0.325837	1.06547e-10
HRAS	MAPKAPK5-AS1	0.683528	8.31113e-53
SLC38A1	MAPKAPK5-AS1	0.369099	1.62865e-13
SLC1A5	MAPKAPK5-AS1	0.374382	6.88246e-14
MAPK3	MAPKAPK5-AS1	0.431828	2.01878e-18
ABCC1	MAPKAPK5-AS1	0.301102	2.81572e-09
EGLN2	MAPKAPK5-AS1	0.526693	4.42894e-28
HSPB1	MAPKAPK5-AS1	0.561265	1.99999e-32
HSF1	MAPKAPK5-AS1	0.443288	1.95881e-19
FANCD2	MAPKAPK5-AS1	0.353361	1.93392e-12
AIFM2	MAPKAPK5-AS1	0.339011	1.64288e-11
ALB	MAPKAPK5-AS1	-0.332333	4.28563e-11
ASNS	MAPKAPK5-AS1	0.334378	3.2033e-11
DDIT3	MAPKAPK5-AS1	0.510308	3.44447e-26
ZNF419	MAPKAPK5-AS1	0.324702	1.2464e-10
STEAP3	MAPKAPK5-AS1	-0.302371	2.39771e-09
SLC2A6	MAPKAPK5-AS1	0.34478	7.04301e-12
STMN1	MAPKAPK5-AS1	0.376163	5.12895e-14
ALOX12	LINC00106	0.412238	8.91404e-17
ALOX12	TMEM9B-AS1	0.399912	8.53536e-16
MAFG	TMEM9B-AS1	0.318341	2.96759e-10
DUOX1	PLBD1-AS1	0.341485	1.14496e-11
NRAS	PLBD1-AS1	0.34787	4.44179e-12
PRKAA2	AL356056.3	0.427143	5.10858e-18
STEAP3	LINC01738	0.319047	2.69771e-10
RPL8	AL450326.1	-0.340446	1.33304e-11
HRAS	AL450326.1	-0.404174	3.94959e-16
GLS2	AL450326.1	0.40497	3.41632e-16
ALOX12	AL450326.1	0.398634	1.07313e-15
EGLN2	AL450326.1	-0.375708	5.53032e-14
HSPB1	AL450326.1	-0.324081	1.35786e-10
GPX2	AL450326.1	-0.309048	1.01634e-09
FTL	AL450326.1	-0.365398	2.95045e-13
RPL8	AP003352.1	0.533105	7.54795e-29
HRAS	AP003352.1	0.405366	3.17744e-16
EGLN2	AP003352.1	0.402261	5.58993e-16
HSPB1	AP003352.1	0.444062	1.66807e-19
HSF1	AP003352.1	0.464857	1.89777e-21
ZNF419	AP003352.1	0.324322	1.31357e-10
CDKN2A	C10orf91	0.460505	4.96777e-21
RPL8	AL031665.2	0.415691	4.65423e-17
G6PD	AL031665.2	0.309435	9.66357e-10
HRAS	AL031665.2	0.492541	2.98738e-24
EGLN2	AL031665.2	0.380674	2.41637e-14
HSPB1	AL031665.2	0.45988	5.69786e-21
HSF1	AL031665.2	0.361888	5.1471e-13
FTL	AL031665.2	0.313188	5.90406e-10
AKR1C2	TAF1A-AS1	0.300134	3.18132e-09
CDKN2A	AC005726.3	0.379656	2.86673e-14
MYB	AC005726.3	0.302057	2.49498e-09
EGLN2	AC005726.3	0.317965	3.12146e-10
FANCD2	AC005726.3	0.383293	1.55258e-14
HELLS	AC005726.3	0.325155	1.17084e-10
SRC	AC005726.3	0.302653	2.31331e-09
NF2	AC005726.3	0.353554	1.8775e-12
ASNS	AC005726.3	0.308666	1.06804e-09
ZNF419	AC005726.3	0.458491	7.71941e-21
SLC2A6	AC005726.3	0.327141	8.89e-11
STMN1	AC005726.3	0.320542	2.20299e-10
DUOX1	AC007566.1	0.440671	3.36301e-19
RPL8	DHRS4-AS1	-0.362345	4.78874e-13
HRAS	DHRS4-AS1	-0.319802	2.43593e-10
GLS2	DHRS4-AS1	0.428871	3.63317e-18
HSF1	DHRS4-AS1	-0.360725	6.17922e-13
GPX2	DHRS4-AS1	-0.327962	7.92839e-11
TUBE1	DHRS4-AS1	0.305137	1.68454e-09
FTL	DHRS4-AS1	-0.368458	1.80603e-13
G6PD	AC098613.1	0.416151	4.26608e-17
MAPK3	AC098613.1	0.346967	5.08527e-12
AKR1C3	AC098613.1	0.411289	1.06439e-16
NQO1	AC098613.1	0.300275	3.12542e-09
SRC	AC098613.1	0.330842	5.29229e-11
PML	AC098613.1	0.391456	3.81148e-15
IL6	AC098613.1	0.314737	4.80787e-10
GLS2	LINC01558	0.394335	2.30121e-15
TUBE1	LINC01558	0.336129	2.49208e-11
DUOX1	AC078778.1	0.300532	3.02574e-09
HRAS	AC078778.1	0.347311	4.83035e-12
SLC38A1	AC078778.1	0.408719	1.7154e-16
SLC1A5	AC078778.1	0.302981	2.21896e-09
CDKN2A	AC078778.1	0.373142	8.43584e-14
MYB	AC078778.1	0.375127	6.0867e-14
YY1AP1	AC078778.1	0.306364	1.43872e-09
FANCD2	AC078778.1	0.512108	2.15998e-26
HELLS	AC078778.1	0.501089	3.60533e-25
ASNS	AC078778.1	0.319587	2.50781e-10
DDIT3	AC078778.1	0.470775	5.01496e-22
ZNF419	AC078778.1	0.392844	2.99023e-15
SLC2A6	AC078778.1	0.450137	4.65553e-20
STMN1	AC078778.1	0.437333	6.6569e-19
RRM2	AC078778.1	0.306526	1.40901e-09
RPL8	AL162413.1	0.3711	1.17745e-13
HRAS	AL162413.1	0.314661	4.85616e-10
EGLN2	AL162413.1	0.369501	1.52608e-13
STMN1	AC092803.2	0.327744	8.17326e-11
YY1AP1	AC006213.5	0.318526	2.89435e-10
HELLS	AC006213.5	0.557142	7.01689e-32
ZNF419	AC006213.5	0.477735	1.01386e-22
NRAS	AC011451.1	0.315417	4.39155e-10
SLC1A5	AC011451.1	0.343454	8.56985e-12
FANCD2	AC011451.1	0.404464	3.74667e-16
HELLS	AC011451.1	0.4205	1.85951e-17
PML	AC011451.1	0.366382	2.52117e-13
NF2	AC011451.1	0.319837	2.4242e-10
CAV1	AC011451.1	0.430168	2.80952e-18
ZNF419	AC011451.1	0.347273	4.85787e-12
ZFP69B	AC011451.1	0.33866	1.72879e-11
STMN1	AC011451.1	0.348622	3.9677e-12
RRM2	AC011451.1	0.309555	9.51256e-10
NRAS	LINC01748	0.3672	2.21112e-13
FANCD2	LINC01748	0.387102	8.10131e-15
HELLS	LINC01748	0.30149	2.68097e-09
ZNF419	LINC01748	0.429134	3.44899e-18
STMN1	LINC01748	0.32462	1.26069e-10
SLC1A5	AL161785.1	0.37447	6.78296e-14
SLC7A5	AL161785.1	0.304598	1.80506e-09
DRD4	AL161785.1	0.432038	1.93566e-18
NRAS	LINC01807	0.300151	3.17453e-09
FANCD2	LINC01807	0.362858	4.41587e-13
SLC2A1	LINC01807	0.320364	2.25718e-10
STMN1	LINC01807	0.391619	3.70503e-15
RRM2	LINC01807	0.358009	9.44467e-13
PML	PSMB8-AS1	0.378684	3.37264e-14
NRAS	AC104785.1	-0.309345	9.77689e-10
MAPK3	AC104785.1	-0.335793	2.61538e-11
YY1AP1	AC104785.1	-0.320114	2.33497e-10
SRC	AC104785.1	-0.328659	7.19271e-11
MAFG	AC104785.1	-0.335361	2.78266e-11
RPL8	AC113143.1	0.394325	2.30539e-15
HRAS	AC113143.1	0.543011	4.5491e-30
EGLN2	AC113143.1	0.429313	3.32898e-18
HSPB1	AC113143.1	0.644365	2.93884e-45
FANCD2	AL512598.1	0.319258	2.62195e-10
STMN1	AL512598.1	0.482334	3.4552e-23
IL6	RASSF8-AS1	0.487148	1.10005e-23
AKR1C1	MIR193BHG	0.305995	1.50875e-09
AKR1C2	MIR193BHG	0.340069	1.40828e-11
RPL8	FOXP4-AS1	0.648152	6.11776e-46
HRAS	FOXP4-AS1	0.476406	1.37986e-22
EGLN2	FOXP4-AS1	0.44528	1.29418e-19
HSPB1	FOXP4-AS1	0.475372	1.75178e-22
HSF1	FOXP4-AS1	0.487517	1.00709e-23
NRAS	RAB11B-AS1	-0.382054	1.91486e-14
TFRC	RAB11B-AS1	-0.369879	1.43565e-13
YY1AP1	RAB11B-AS1	-0.315038	4.61858e-10
FANCD2	RAB11B-AS1	-0.325315	1.14534e-10
PML	RAB11B-AS1	-0.323419	1.48723e-10
ZFP69B	RAB11B-AS1	-0.383396	1.52574e-14
CS	SNHG16	0.301972	2.52223e-09
NRAS	SNHG16	0.308891	1.03732e-09
PRKAA2	SNHG16	0.318082	3.07276e-10
ZFP69B	SNHG16	0.315089	4.58738e-10
MAFG	SNHG16	0.374342	6.92776e-14
RPL8	AC012462.3	0.440132	3.7569e-19
HRAS	AC012462.3	0.47122	4.53249e-22
EGLN2	AC012462.3	0.469936	6.0661e-22
HSPB1	AC012462.3	0.529604	1.99268e-28
MAPK3	AC083799.1	0.32403	1.36742e-10
YY1AP1	AC083799.1	0.356637	1.16836e-12
FANCD2	AC083799.1	0.430101	2.84724e-18
HELLS	AC083799.1	0.327507	8.44799e-11
ZNF419	AC083799.1	0.318069	3.0783e-10
SLC2A6	AC083799.1	0.313681	5.53089e-10
STMN1	AC083799.1	0.369069	1.63663e-13
RRM2	AC083799.1	0.307631	1.22155e-09
AURKA	AC083799.1	0.325396	1.13255e-10
ALOX15B	AC108134.2	0.317129	3.49289e-10
DUOX1	AC021078.1	0.318762	2.80378e-10
SLC38A1	AC021078.1	0.433969	1.31429e-18
ALOX12	AC021078.1	0.351004	2.76872e-12
ABCC1	AC021078.1	0.400508	7.66881e-16
DNAJB6	AC021078.1	0.327661	8.26882e-11
FANCD2	AC021078.1	0.321512	1.93073e-10
SRC	AC021078.1	0.312451	6.50691e-10
PML	AC021078.1	0.316835	3.63321e-10
PTGS2	AC021078.1	0.300759	2.94044e-09
ZNF419	AC021078.1	0.321143	2.03006e-10
MAFG	AC021078.1	0.346886	5.1473e-12
G6PD	AC010973.2	0.343026	9.12873e-12
HRAS	AC010973.2	0.392552	3.14753e-15
SLC38A1	AC010973.2	0.409394	1.51377e-16
SLC1A5	AC010973.2	0.330751	5.36061e-11
TAZ	AC010973.2	0.454493	1.8353e-20
DNAJB6	AC010973.2	0.322413	1.70705e-10
HSPB1	AC010973.2	0.401149	6.83214e-16
FANCD2	AC010973.2	0.359599	7.37143e-13
SRC	AC010973.2	0.310328	8.59986e-10
NF2	AC010973.2	0.339996	1.42348e-11
ASNS	AC010973.2	0.34601	5.86615e-12
DDIT3	AC010973.2	0.425686	6.7989e-18
SLC7A5	AC010973.2	0.473472	2.71107e-22
ZNF419	AC010973.2	0.313847	5.41022e-10
DRD4	AC010973.2	0.481482	4.22346e-23
SLC2A6	AC010973.2	0.433886	1.33665e-18
STMN1	AC010973.2	0.319783	2.44223e-10
CS	LINC01956	0.481642	4.06752e-23
SLC38A1	LINC01956	0.358767	8.3935e-13
NRAS	LINC01518	0.311461	7.41298e-10
CS	SPINT1-AS1	0.466723	1.25093e-21
SLC38A1	SPINT1-AS1	0.446684	9.64565e-20
ABCC1	SPINT1-AS1	0.359494	7.49322e-13
SRC	SPINT1-AS1	0.380165	2.63232e-14
ZNF419	SPINT1-AS1	0.359638	7.32646e-13
CAPG	SPINT1-AS1	0.325962	1.04714e-10
NQO1	TMEM92-AS1	0.315832	4.15488e-10
GPX2	TMEM92-AS1	0.372307	9.67056e-14
RPL8	AL355987.4	0.474176	2.30681e-22
G6PD	AL355987.4	0.312017	6.8896e-10
HRAS	AL355987.4	0.344053	7.84402e-12
EGLN2	AL355987.4	0.326395	9.86061e-11
HSF1	AL355987.4	0.435789	9.10407e-19
FANCD2	AL355987.4	0.336905	2.22866e-11
[truncated: 3,295 more rows]
