# Supplementary material for: Development and validation of ferroptosis-related lncRNAs signature for hepatocellular carcinoma
Source: PeerJ. 2021 Jun 11;9:e11627. doi: 10.7717/peerj.11627 (PMC8202323; doi:10.7717/peerj.11627)
Supplement: Supplemental Information 7 [file peerj-09-11627-s007.xlsx]

## Sheet: Sheet1
Training cohort
Univariate COX regression
FRlncRNAs	HR	HR.95L	HR.95H	Pvalue
RHPN1-AS1	3.30216	1.78736	6.10079	0.000136606
SNHG17	1.43778	1.01897	2.02871	0.0387383
DGCR11	1.78512	1.06279	2.9984	0.0285162
MAPKAPK5-AS1	1.92518	1.2974	2.85673	0.00114209
PVT1	1.51877	1.01914	2.26332	0.0400602
PART1	1.67876	1.01515	2.77617	0.043534
LINC00339	1.71431	1.09002	2.69617	0.0196464
HCG18	1.92944	1.04595	3.55919	0.0353985
Multivariate Cox regression
FRlncRNAs	HR	HR.95L	HR.95H	Pvalue
`RHPN1-AS1`	2.45402	1.2629	4.76853	0.0080821
`MAPKAPK5-AS1`	1.62512	1.06284	2.48487	0.0250102
PART1	1.74498	1.0476	2.90659	0.0324695
